# Supplementary material for: Genetic Diversity Relationship Between Grain Quality and Appearance in Rice
Source: Front Plant Sci. 2021 Aug 2;12:708996. doi: 10.3389/fpls.2021.708996 (PMC8365354; doi:10.3389/fpls.2021.708996)
Supplement: Supplementary Table 1 — The sample list and structure information of O. sativa accessions. [file Table_1.XLSX]

## Sheet: Table S1
Table S1 The sample list and structure information of O. sativa accessions.
NSFTV ID	GSOR ID	Name	Subgroup	Region
NSFTV1	301001	Agostano	TEJ	West_Europe
NSFTV2	301002	Aichi Asahi	TEJ	East_Asia
NSFTV3	301003	Ai-Chiao-Hong	IND	East_Asia
NSFTV4	301004	NSF-TV 4	AUS	Unknown
NSFTV5	301005	NSF-TV 5	ARO	Unknown
NSFTV6	301006	ARC 7229	AUS	South_Asia
NSFTV7	301007	Arias	TRJ	Southeast_Asia
NSFTV8	301008	Asse Y Pung	TRJ	Southeast_Asia
NSFTV9	301009	Baber	TEJ	South_Asia
NSFTV10	301010	Baghlani Nangarhar	TEJ	South_Asia
NSFTV11	301382	Baguamon 15	IND	South_Asia
NSFTV13	301012	NSF-TV 13	AUS	Unknown
NSFTV15	301383	Beonjo	TEJ	East_Asia
NSFTV16	301014	Bico Branco	ARO	South_America
NSFTV17	301015	Binulawan	IND	Southeast_Asia
NSFTV18	301016	BJ 1	AUS	South_Asia
NSFTV19	301017	Black Gora	AUS	South_Asia
NSFTV20	301018	Blue Rose	TRJ	North_America
NSFTV21	301019	Byakkoku Y 5006 Seln	IND	Oceania
NSFTV22	301020	Caawa/Fortuna 6-103-15	TRJ	East_Asia
NSFTV23	301021	Canella De Ferro	TRJ	South_America
NSFTV24	301022	Carolina Gold	TRJ	North_America
NSFTV25	301023	Carolina Gold	TRJ	North_America
NSFTV26	301024	Carolina Gold Sel	TRJ	North_America
NSFTV27	301025	NSF-TV 27	TRJ	Unknown
NSFTV28	301026	Champa Tong 54	AUS	Southeast_Asia
NSFTV29	301027	Chau	IND	Southeast_Asia
NSFTV30	301028	Chiem Chanh	IND	Southeast_Asia
NSFTV31	301029	Chinese	TEJ	East_Asia
NSFTV32	301030	Chodongji	TEJ	East_Asia
NSFTV33	301031	Chuan 4	AUS	East_Asia
NSFTV34	301032	NSF-TV 34	IND	Unknown
NSFTV35	301033	CO18	IND	South_Asia
NSFTV36	301034	CS-M3	TEJ	North_America
NSFTV37	301035	Cuba 65	TRJ	Caribbean
NSFTV39	301037	NSF-TV 39	AUS	Unknown
NSFTV40	301038	Dam	TRJ	Southeast_Asia
NSFTV41	301039	Darmali	ADM	South_Asia
NSFTV43	301040	Dee Geo Woo Gen	IND	East_Asia
NSFTV44	301041	Dhala Shaitta	AUS	South_Asia
NSFTV45	301042	Dom-sufid	ARO	West_Asia
NSFTV46	301043	Dourado Agulha	TRJ	South_America
NSFTV48	NA	NA	TRJ	Unknown
NSFTV49	301045	DV85	AUS	South_Asia
NSFTV51	301047	Early Wataribune	TEJ	East_Asia
NSFTV52	301048	Eh Ia Chiu	TEJ	East_Asia
NSFTV53	301049	Firooz	ARO	West_Asia
NSFTV54	301050	Fortuna	TRJ	North_America
NSFTV55	301051	Gerdeh	TEJ	West_Asia
NSFTV56	301052	Geumobyeo	TEJ	East_Asia
NSFTV57	301053	NSF-TV 57	IND	Unknown
NSFTV58	301054	Ghati Kamma Nangarhar	AUS	South_Asia
NSFTV59	301055	Gogo Lempuk	TRJ	Southeast_Asia
NSFTV60	301056	Gotak Gatik	TEJ	Southeast_Asia
NSFTV62	301386	Gyehwa 3	TEJ	East_Asia
NSFTV63	301387	Haginomae Mochi	TEJ	East_Asia
NSFTV64	301388	Heukgyeong	TEJ	East_Asia
NSFTV65	301058	Honduras	TRJ	Central_America
NSFTV66	301059	Hsia Chioh Keh Tu	IND	East_Asia
NSFTV67	301060	Hu Lo Tao	TEJ	East_Asia
NSFTV69	301062	IAC 25	TRJ	South_America
NSFTV70	301063	Iguape Cateto	TRJ	Caribbean
NSFTV71	301064	IR 36	IND	Southeast_Asia
NSFTV72	301065	IR 8	IND	Southeast_Asia
NSFTV73	301066	IRAT 177	TRJ	South_America
NSFTV74	301067	IRGA 409	IND	South_America
NSFTV75	301068	Jambu	TRJ	Southeast_Asia
NSFTV76	301069	Jaya	IND	South_Asia
NSFTV77	301070	JC149	IND	South_Asia
NSFTV78	301071	Jhona 349	AUS	South_Asia
NSFTV79	301072	Jouiku 393G	TEJ	East_Asia
NSFTV80	301073	K 65	ADM	South_America
NSFTV81	301074	Kalamkati	AUS	South_Asia
NSFTV83	301075	Kamenoo	TEJ	East_Asia
NSFTV84	301076	Kaniranga	TRJ	Southeast_Asia
NSFTV85	301077	Kasalath	AUS	South_Asia
NSFTV87	301079	Keriting Tingii	TRJ	Southeast_Asia
NSFTV89	301081	NSF-TV 89	TRJ	Unknown
NSFTV90	301082	Kiang-Chou-Chiu	IND	East_Asia
NSFTV91	301083	Kibi	TEJ	East_Asia
NSFTV92	301084	Kinastano	TRJ	Southeast_Asia
NSFTV93	301085	Kitrana 508	ARO	Unknown
NSFTV94	301086	Koshihikari	TEJ	East_Asia
NSFTV95	301087	NSF-TV 95	ADM	Unknown
NSFTV96	301088	KU115	TRJ	Southeast_Asia
NSFTV98	301090	L-202	TRJ	North_America
NSFTV99	301091	LAC 23	TRJ	Africa
NSFTV100	301092	Lacrosse	ADM	North_America
NSFTV101	301093	Lemont	TRJ	North_America
NSFTV102	301094	Leung Pratew	IND	Southeast_Asia
NSFTV103	301095	Luk Takhar	TEJ	South_Asia
NSFTV104	301096	Mansaku	TEJ	East_Asia
NSFTV105	301097	Mehr	AUS	West_Asia
NSFTV106	301098	Ming Hui	IND	East_Asia
NSFTV107	301099	NSF-TV 107	TRJ	Unknown
NSFTV108	301100	Moroberekan	TRJ	Africa
NSFTV110	301102	Mudgo	IND	South_Asia
NSFTV112	301104	N12	ARO	South_Asia
NSFTV113	301105	Norin 20	TEJ	East_Asia
NSFTV114	301106	Nova	TRJ	North_America
NSFTV115	301107	NPE 835	TEJ	South_Asia
NSFTV116	301108	NSF-TV 116	TRJ	Unknown
NSFTV117	301109	O-Luen-Cheung	IND	East_Asia
NSFTV118	301110	Oro	TEJ	South_America
NSFTV119	301111	Oryzica Llanos 5	IND	South_America
NSFTV120	301112	OS6	TRJ	Africa
NSFTV121	301113	Ostiglia	TEJ	West_Europe
NSFTV122	301114	Padi Kasalle	TRJ	Southeast_Asia
NSFTV123	301115	Pagaiyahan	IND	East_Asia
NSFTV124	301390	Pankhari 203	ARO	South_Asia
NSFTV125	301116	Pao-Tou-Hung	IND	East_Asia
NSFTV126	301117	Pappaku	IND	East_Asia
NSFTV127	NA	NA	TRJ	Unknown
NSFTV128	301119	Pato De Gallinazo	TEJ	Oceania
NSFTV129	301120	Peh-Kuh	IND	East_Asia
NSFTV130	301121	Peh-Kuh-Tsao-Tu	IND	East_Asia
NSFTV131	301122	Phudugey	AUS	South_Asia
NSFTV132	301123	Rathuwee	IND	South_Asia
NSFTV133	301124	Rikuto Kemochi	TEJ	East_Asia
NSFTV134	301125	Romeo	TEJ	West_Europe
NSFTV136	301127	RTS12	IND	Southeast_Asia
NSFTV137	301128	RTS14	IND	Southeast_Asia
NSFTV138	301129	RTS4	IND	Southeast_Asia
NSFTV139	301130	S4542A3-49B-2B12	TRJ	North_America
NSFTV140	301131	Saturn	TRJ	North_America
NSFTV141	301132	Seratoes Hari	IND	Southeast_Asia
NSFTV142	301133	Shai-Kuh	IND	East_Asia
NSFTV143	301134	Shinriki	TEJ	East_Asia
NSFTV144	301135	Shoemed	TEJ	North_America
NSFTV145	301136	Short Grain	IND	Southeast_Asia
NSFTV147	301138	Sinampaga Selection	TRJ	Southeast_Asia
NSFTV148	301139	Sintane Diofor	IND	Africa
NSFTV149	301140	Sinaguing	TRJ	Southeast_Asia
NSFTV150	301141	Sultani	TRJ	Africa
NSFTV151	301142	Suweon	TEJ	East_Asia
NSFTV152	301143	T 1	AUS	South_Asia
NSFTV153	301144	T26	AUS	South_Asia
NSFTV154	301145	Ta Hung Ku	TEJ	East_Asia
NSFTV155	301146	Ta Mao Tsao	TEJ	East_Asia
NSFTV156	301147	Taichung Native 1	IND	East_Asia
NSFTV157	301148	Tainan Iku 487	TEJ	East_Asia
NSFTV158	301149	Taipei 309	TEJ	East_Asia
NSFTV159	301150	Tam Cau 9A	IND	Southeast_Asia
NSFTV160	301151	NSF-TV 160	ARO	Unknown
NSFTV161	301152	TeQing	IND	East_Asia
NSFTV162	301153	TKM6	IND	South_Asia
NSFTV163	301154	Taducan	IND	Southeast_Asia
NSFTV164	301155	Tondok	TRJ	Southeast_Asia
NSFTV165	301156	Trembese	TRJ	Southeast_Asia
NSFTV166	301157	Tsipala 421	ADM	Africa
NSFTV167	301158	B6616A4-22-Bk-5-4	TRJ	North_America
NSFTV169	301160	WC 6	TEJ	East_Asia
NSFTV170	301161	Wells	TRJ	North_America
NSFTV171	301162	ZHE 733	IND	East_Asia
NSFTV172	301163	Zhenshan 2	IND	East_Asia
NSFTV173	301164	Nipponbare	TEJ	East_Asia
NSFTV174	301165	Azucena	TRJ	Southeast_Asia
NSFTV175	NA	NA	TRJ	Unknown
NSFTV176	301167	583	TRJ	South_America
NSFTV177	301168	68-2	TEJ	West_Europe
NSFTV178	301169	ARC 6578	AUS	South_Asia
NSFTV179	301170	Bellardone	TEJ	West_Europe
NSFTV180	301171	Benllok	TEJ	South_America
NSFTV181	301172	Bergreis	TEJ	West_Europe
NSFTV182	301173	Blue Rose Supreme	TRJ	North_America
NSFTV183	301174	Boa Vista	TRJ	Central_America
NSFTV184	301175	Bombon	TEJ	West_Europe
NSFTV185	301176	British Honduras Creole	TRJ	Central_America
NSFTV186	301177	Bul Zo	TEJ	East_Asia
NSFTV187	301178	C57-5043	TRJ	North_America
NSFTV188	301179	Coppocina	TRJ	East_Europe
NSFTV189	301180	Criollo La Fria	IND	South_America
NSFTV190	301181	Delrex	TRJ	North_America
NSFTV191	301182	Dom Zard	ARO	West_Asia
NSFTV192	301183	Erythroceros Hokkaido	TEJ	East_Europe
NSFTV193	301184	Fossa Av	TRJ	Africa
NSFTV194	NA	NA	ADM	Unknown
NSFTV195	301186	IRAT 13	TRJ	Africa
NSFTV196	301187	JM70	IND	Africa
NSFTV198	301189	Leah	TRJ	North_America
NSFTV199	301190	NSF-TV 199	TRJ	Unknown
NSFTV200	301191	P 737	AUS	South_Asia
NSFTV201	301192	Pate Blanc Mn 1	TRJ	Africa
NSFTV202	301193	Pratao	TRJ	South_America
NSFTV203	301194	Radin Ebos 33	IND	Southeast_Asia
NSFTV204	301195	Razza 77	TEJ	West_Europe
NSFTV205	301196	Rinaldo Bersani	TEJ	West_Europe
NSFTV206	301197	Rojofotsy 738	ADM	Africa
NSFTV207	301198	Sigadis	IND	Southeast_Asia
NSFTV208	301199	SLO 17	IND	South_Asia
NSFTV209	301200	Tchibanga	IND	Africa
NSFTV211	301202	Tokyo Shino Mochi	TRJ	East_Asia
NSFTV212	NA	NA	TRJ	Unknown
NSFTV213	301204	WC 3397	TRJ	Caribbean
NSFTV214	301205	WC 4419	TRJ	Central_America
NSFTV215	301206	WC 4443	TRJ	South_America
NSFTV216	301207	Yabani Montakhab 7	TEJ	Africa
NSFTV217	301208	YRL-1	TRJ	Oceania
NSFTV218	301209	PI 298967-1	TRJ	Oceania
NSFTV219	301210	Nucleoryza	TEJ	West_Europe
NSFTV220	301211	Azerbaidjanica	TEJ	West_Asia
NSFTV221	301212	Sadri Belyi	ARO	West_Asia
NSFTV222	301213	Paraiba Chines Nova	IND	South_America
NSFTV223	301214	Priano Guaira	TRJ	South_America
NSFTV224	301215	Karabaschak	TEJ	East_Europe
NSFTV225	301216	Biser 1	TEJ	East_Europe
NSFTV226	301217	IRAT 44	TRJ	Africa
NSFTV227	301218	Riz Local	ADM	Africa
NSFTV228	301219	CA 902/B/2/1	AUS	Africa
NSFTV230	NA	NA	TEJ	Unknown
NSFTV231	301221	Hunan Early Dwarf No. 3	IND	East_Asia
NSFTV232	301222	Shangyu 394	TEJ	East_Asia
NSFTV233	301223	Sung Liao 2	TEJ	East_Asia
NSFTV234	301224	Aijiaonante	IND	East_Asia
NSFTV235	301225	Sze Guen Zim	IND	East_Asia
NSFTV236	301226	WC 521	TEJ	East_Asia
NSFTV237	301227	Estrela	TRJ	South_America
NSFTV238	301228	WAB 56-104	TRJ	Africa
NSFTV239	301229	WAB 502-13-4-1	TRJ	Africa
NSFTV240	301230	WAB 501-11-5-1	TRJ	Africa
NSFTV241	301231	ECIA76-S89-1	IND	South_America
NSFTV242	301232	27	TRJ	Caribbean
NSFTV243	301233	Tropical Rice	TEJ	South_America
NSFTV244	301234	Arabi	ADM	Africa
NSFTV245	301235	Sab Ini	TEJ	Africa
NSFTV246	301236	Saraya	AUS	Oceania
NSFTV247	301237	Desvauxii	TEJ	East_Europe
NSFTV248	301238	Caucasica	TEJ	East_Europe
NSFTV249	301239	Pirinae 69	ADM	East_Europe
NSFTV250	301240	Bulgare	TEJ	West_Europe
NSFTV251	301241	H256-76-1-1-1	TRJ	South_America
NSFTV252	301242	Djimoron	IND	Africa
NSFTV253	301243	Guineandao	TRJ	Africa
NSFTV255	301245	Pai Hok Glutinous	IND	East_Asia
NSFTV256	301246	Romanica	TEJ	East_Europe
NSFTV257	301247	Agusita	TEJ	East_Europe
NSFTV258	301248	Tia Bura	TRJ	Southeast_Asia
NSFTV259	301249	Sadri Tor Misri	ADM	West_Asia
NSFTV260	301250	NSF-TV 260	ARO	Unknown
NSFTV261	301251	Shim Balte	AUS	West_Asia
NSFTV262	301252	Halwa Gose Red	AUS	West_Asia
NSFTV263	301253	Maratelli	TEJ	West_Europe
NSFTV264	301254	Baldo	TEJ	West_Europe
NSFTV265	301255	Vialone	TEJ	West_Europe
NSFTV266	301256	Hiderisirazu	TEJ	East_Asia
NSFTV267	301257	Hatsunishiki	TEJ	East_Asia
NSFTV268	301258	Vavilovi	TEJ	Central_Asia
NSFTV269	301259	Sundensis	IND	Central_Asia
NSFTV270	301260	Osogovka	TEJ	East_Europe
NSFTV271	301261	M. Blatec	TEJ	East_Europe
NSFTV272	301262	923	ADM	Africa
NSFTV273	301263	Varyla	TRJ	Africa
NSFTV274	301264	Padi Pagalong	TRJ	Southeast_Asia
NSFTV275	301265	Sri Malaysia Dua	TEJ	Southeast_Asia
NSFTV276	301266	Kaukau	AUS	Africa
NSFTV277	301267	Gambiaka Sebela	TEJ	Africa
NSFTV278	301268	C1-6-5-3	ADM	North_America
NSFTV279	301269	Kon Suito	ADM	East_Asia
NSFTV280	301270	Saku	TRJ	East_Asia
NSFTV281	301271	Patna	TEJ	Africa
NSFTV282	301272	Triomphe Du Maroc	TEJ	Africa
NSFTV283	301273	Chibica	TEJ	Africa
NSFTV284	301274	IR-44595	IND	South_Asia
NSFTV285	301275	Tox 782-20-1	TRJ	Africa
NSFTV286	301276	IITA 135	TRJ	Africa
NSFTV287	301277	Zerawchanica Karatalski	TEJ	East_Europe
NSFTV288	301278	Italica Carolina	TEJ	East_Europe
NSFTV289	301279	Lusitano	TEJ	West_Europe
NSFTV290	301280	Amposta	TEJ	Caribbean
NSFTV291	301281	Toploea 70/76	TEJ	East_Europe
NSFTV292	301282	Stegaru 65	TEJ	East_Europe
NSFTV293	301283	TOg 7178	ADM	Africa
NSFTV294	301284	SL 22-613	IND	Africa
NSFTV295	301285	Bombilla	TEJ	West_Europe
NSFTV296	301286	Dosel	TEJ	West_Europe
NSFTV297	301287	Bahia	TEJ	West_Europe
NSFTV299	301289	SML 242	IND	South_America
NSFTV300	301290	Sml Kapuri	TEJ	South_America
NSFTV301	301291	Melanotrix	TEJ	Central_Asia
NSFTV302	301292	WIR 3039	TEJ	Central_Asia
NSFTV303	301293	Kihogo	TEJ	Africa
NSFTV304	301294	519	IND	South_America
NSFTV305	301295	Doble Carolina Rinaldo Barsani	TEJ	South_America
NSFTV306	301296	WIR 3764	TEJ	Central_Asia
NSFTV307	301297	Uzbekskij 2	TEJ	Central_Asia
NSFTV308	301298	Llanero 501	TRJ	South_America
NSFTV309	301299	Manzano	TRJ	Africa
NSFTV310	301300	R 101	TRJ	Africa
NSFTV311	301301	56-122-23	TEJ	Southeast_Asia
NSFTV313	301303	BR24	IND	South_Asia
NSFTV314	301304	CTG 1516	AUS	South_Asia
NSFTV315	301305	Dawebyan	IND	Southeast_Asia
NSFTV316	301306	DD 62	AUS	South_Asia
NSFTV317	301307	DJ 123	AUS	South_Asia
NSFTV318	301308	DJ 24	AUS	South_Asia
NSFTV319	301309	DK 12	AUS	South_Asia
NSFTV320	301310	DM 43	AUS	South_Asia
NSFTV321	301311	DM 56	AUS	South_Asia
NSFTV322	301312	DM 59	AUS	South_Asia
NSFTV323	301313	DNJ 140	AUS	South_Asia
NSFTV324	301314	DV 123	AUS	South_Asia
NSFTV325	301315	EMATA A 16-34	IND	Southeast_Asia
NSFTV326	301316	Ghorbhai	AUS	South_Asia
NSFTV327	301317	Goria	AUS	South_Asia
NSFTV328	301318	Jamir	AUS	South_Asia
NSFTV329	301319	Kachilon	AUS	South_Asia
NSFTV330	301320	Khao Pahk Maw	AUS	Southeast_Asia
NSFTV331	301321	Khao Tot Long 227	AUS	Southeast_Asia
NSFTV332	301322	KPF-16	ADM	South_Asia
NSFTV333	301323	Leuang Hawn	TEJ	Southeast_Asia
NSFTV334	301324	Lomello	TEJ	West_Europe
NSFTV335	301325	Okshitmayin	TRJ	Southeast_Asia
NSFTV336	301326	Paung Malaung	AUS	Southeast_Asia
NSFTV337	301327	Sabharaj	IND	South_Asia
NSFTV338	301328	Sitpwa	TEJ	Southeast_Asia
NSFTV339	301329	Yodanya	IND	Southeast_Asia
NSFTV340	301330	Berenj	ADM	South_Asia
NSFTV341	301331	Shirkati	AUS	South_Asia
NSFTV342	301332	Cenit	TRJ	South_America
NSFTV343	301333	Victoria F.A.	TEJ	South_America
NSFTV344	301334	Habiganj Boro 6	ADM	South_Asia
NSFTV345	301335	DZ 193	AUS	South_Asia
NSFTV346	301336	Karkati 87	AUS	South_Asia
NSFTV347	301337	Creole	TRJ	Central_America
NSFTV348	301338	China 1039	IND	East_Asia
NSFTV349	301339	Chang Ch'Sang Hsu Tao	IND	East_Asia
NSFTV350	301340	Ligerito	TRJ	South_America
NSFTV351	NA	NA	TEJ	Unknown
NSFTV352	301393	Guatemala 1021	TRJ	Central_America
NSFTV353	301341	ARC 10376	AUS	South_Asia
NSFTV354	301342	BALA	IND	South_Asia
NSFTV355	301343	ASD 1	TEJ	South_Asia
NSFTV356	301344	JC 117	IND	South_Asia
NSFTV357	301345	9524	AUS	South_Asia
NSFTV358	301346	ARC 10086	TRJ	South_Asia
NSFTV359	301347	Surjamkuhi	AUS	South_Asia
NSFTV360	301348	PTB 30	AUS	South_Asia
NSFTV362	NA	NA	TRJ	Unknown
NSFTV363	301350	Edomen Scented	TEJ	East_Asia
NSFTV364	301351	Rikuto Norin 21	TRJ	East_Asia
NSFTV365	301352	Shirogane	TEJ	East_Asia
NSFTV366	301353	Kiuki No. 46	TEJ	East_Asia
NSFTV367	301354	Sanbyang-Daeme	TRJ	East_Asia
NSFTV368	301355	Deokjeokjodo	TEJ	East_Asia
NSFTV369	301356	Sathi	AUS	South_Asia
NSFTV370	301357	Coarse	AUS	South_Asia
NSFTV371	301358	Santhi Sufaid	AUS	South_Asia
NSFTV372	301359	Sufaid	AUS	South_Asia
NSFTV373	301360	Lambayeque 1	ARO	South_America
NSFTV374	NA	NA	TEJ	Unknown
NSFTV375	301396	Upland	TRJ	Oceania
NSFTV376	301361	Breviaristata	TEJ	West_Europe
NSFTV377	301362	PR 304	TRJ	Caribbean
NSFTV378	301363	Kalubala Vee	AUS	South_Asia
NSFTV379	301364	Wanica	TRJ	South_America
NSFTV380	301365	Tainan-Iku No. 512	TEJ	East_Asia
NSFTV381	301366	325	TRJ	East_Asia
NSFTV383	NA	NA	TEJ	Unknown
NSFTV384	301367	318	TRJ	West_Asia
NSFTV385	301368	Nira	IND	North_America
NSFTV386	301369	Palmyra	TRJ	North_America
NSFTV387	301370	M-202	TEJ	North_America
NSFTV388	301371	Nortai	TEJ	North_America
NSFTV389	301372	CI 11011	TRJ	North_America
NSFTV390	301373	CI 11026	ADM	North_America
NSFTV391	301374	Della	TRJ	North_America
NSFTV392	301375	Edith	TRJ	North_America
NSFTV394	301377	Lady Wright Seln	TRJ	North_America
NSFTV395	301378	OS 6 (WC 10296)	TRJ	Africa
NSFTV396	301379	Cocodrie	TRJ	North_America
NSFTV397	301380	Cybonnet	TRJ	North_America
NSFTV398	301399	93-11	IND	East_Asia
NSFTV399	301381	Spring	TRJ	North_America
NSFTV400	301400	Yang Dao 6	IND	East_Asia
NSFTV612	301401	IR64	IND	Southeast_Asia
NSFTV616	301416	RT0034	IND	North_America
NSFTV617	301417	MCR010277	ADM	North_America
NSFTV618	301404	Pecos	TRJ	North_America
NSFTV619	301405	Rosemont	TRJ	North_America
NSFTV620	301406	Jasmine85	IND	Southeast_Asia
NSFTV621	301402	LaGrue	TRJ	North_America
NSFTV622	301418	Bengal	TRJ	North_America
NSFTV624	301408	Kaybonnet	TRJ	North_America
NSFTV625	301419	Katy	TRJ	North_America
NSFTV626	301420	C101A51	IND	Southeast_Asia
NSFTV627	301421	Early	TRJ	North_America
NSFTV628	301409	Jefferson	TRJ	North_America
NSFTV629	301410	Panda	TRJ	West_Europe
NSFTV630	301411	Saber	TRJ	North_America
NSFTV631	301412	Dragon Eyeball 100	ADM	East_Asia
NSFTV632	301413	Francis	TRJ	North_America
NSFTV633	301414	Jing 185-7	IND	East_Asia
NSFTV634	301415	Rondo (4484-1693)	IND	East_Asia
NSFTV635	312001	Azucena	TRJ	Southeast_Asia
NSFTV636	312002	Sadu Cho	IND	East_Asia
NSFTV638	312004	Moroberekan	TRJ	Africa
NSFTV639	312005	Nipponbare	TEJ	East_Asia
NSFTV641	312007	Tainung 67	TEJ	East_Asia
NSFTV642	312008	Zhenshan 97B	IND	East_Asia
NSFTV643	312009	Minghui 63	IND	East_Asia
NSFTV644	312010	IR64	IND	Southeast_Asia
NSFTV646	312012	NA	IND	South_Asia
NSFTV647	312013	Cypress	TRJ	North_America
NSFTV651	312017	Dular	AUS	South_Asia
NSFTV652	312018	Li-Jiang-Xin-Tuan-Hei-Gu	TEJ	East_Asia
NSFTV770	301422	Mojito Colorado	TRJ	South_America
