# Supplementary material for: Genetic Diversity Relationship Between Grain Quality and Appearance in Rice
Source: Front Plant Sci. 2021 Aug 2;12:708996. doi: 10.3389/fpls.2021.708996 (PMC8365354; doi:10.3389/fpls.2021.708996)
Supplement: Supplementary Table 2 — Spearman's correlation among the traits. [file Table_2.XLSX]

## Sheet: Table S2
Table S2 Spearman correlation among the traits.
	AC (Amylose Content)	GT (Gelatinization Temperature )	GPC (Grain Protein Content )	PC (Pericarp Color )	GV (Grain Volume )	LWR (Length-Width Ratio )
AC	1	-0.171648	-0.22179	0.37181	-0.488166	0.334358
GT	-0.171648	1	-0.0512737	-0.0700064	0.0474117	-0.370289
GPC	-0.22179	-0.0512737	1	-0.105602	0.164369	0.0884048
PC	0.37181	-0.0700064	-0.105602	1	-0.143307	0.0444889
GV	-0.488167	0.0474117	0.164369	-0.143307	1	-0.42132
LWR	0.334358	-0.370289	0.0884048	0.0444889	-0.42132	1
