# Supplementary material for: Genetic Diversity Relationship Between Grain Quality and Appearance in Rice
Source: Front Plant Sci. 2021 Aug 2;12:708996. doi: 10.3389/fpls.2021.708996 (PMC8365354; doi:10.3389/fpls.2021.708996)
Supplement: Supplementary Table 3 — LD blocks information for each QTL. [file Table_3.XLSX]

## Sheet: Table S3
Table S3 LD blocks information for each QTL.
QTL	Chromosome	LD block
		Start	End
qAC1-1	1	3165487	3184457
qAC1-2	1	3226694	3367313
qAC12-1	12	16968981	17168981
qAC6-1	6	1665761	1865761
qAC6-2	6	20852981	20855898
qAC8-1	8	24785271	24794328
qGPC11-1	11	11666005	11668872
qGPC12-1	12	2573221	2773221
qGT2-1	2	20220207	20220308
qGT3-1	3	13197384	13310468
qGT3-3	3	16260428	16330178
qGT4-1	4	13868254	14068254
qGT4-2	4	24096718	24296718
qGT6-1	6	2147159	2207080
qGT6-2	6	6681600	6688314
qGT6-3	6	6815059	6830286
qGT6-4	6	7024152	7024507
qGT8-1	8	4684986	4838612
qGT8-2	8	20663355	20863355
qGV12-1	12	21757075	21775097
qGV3-1	3	8209577	8311836
qGV3-2	3	16726980	16733441
qGV5-1	5	5355339	5356107
qGV6-1	6	12486259	12504994
qGV7-1	7	24407872	24458011
qLWR3-1	3	5110399	5310399
qLWR3-2	3	16726980	16733441
qLWR3-3	3	16747632	16755906
qLWR4-1	4	19256048	19268801
qLWR4-2	4	24917480	24968667
qLWR5-1	5	5362752	5391199
qLWR5-2	5	28470845	28486235
qLWR5-3	5	28487739	28503344
qLWR7-1	7	117125	317125
qLWR7-2	7	22105291	22145533
qLWR7-3	7	25214515	25239012
qPC2-1	2	9639865	9660032
qPC4-1	4	20156116	20159602
qPC4-2	4	28606952	28610659
qPC7-1	7	5968017	6168017
qPC7-2	7	7197177	7241993
qPC7-3	7	10916744	10932506
qPC8-1	8	2366744	2373426
