# Supplementary material for: Genetic Diversity Relationship Between Grain Quality and Appearance in Rice
Source: Front Plant Sci. 2021 Aug 2;12:708996. doi: 10.3389/fpls.2021.708996 (PMC8365354; doi:10.3389/fpls.2021.708996)
Supplement: Supplementary Table 4 — List of candidate genes located in the LD blocks. [file Table_4.XLSX]

## Sheet: Table S4
Table S4 List of candidate genes located in the LD blocks.
Trait	Significant SNP	Distance	Chromosome	Start	End	Direction	Gene	Annotation
qAC1-2	S1_3329456	-85.408	1	3243674	3244422	-	Os01g0162001	Hypothetical gene. (Os01t0162001-00)
qAC1-2	S1_3329456	-84.262	1	3244945	3245443	-	Os01g0162101	Similar to MATE. (Os01t0162101-00)
qAC1-2	S1_3329456	-77.381	1	3251426	3252724	+	Os01g0162200	Leucine-rich repeat domain containing protein. (Os01t0162200-00)
qAC1-2	S1_3329456	-72.0945	1	3256822	3257901	+	Os01g0162300	Leucine-rich repeat, plant specific containing protein. (Os01t0162300-01)
qAC1-2	S1_3329456	-71.0395	1	3257944	3258889	+	Os01g0162400	Conserved hypothetical protein. (Os01t0162400-01)
qAC1-2	S1_3329456	-68.3675	1	3259516	3262661	+	Os01g0162500	Leucine-rich repeat-containing N-terminal, type 2 domain containing protein. (Os01t0162500-01)
qAC1-2	S1_3329456	-55.863	1	3272800	3274386	-	Os01g0162701	Hypothetical gene. (Os01t0162701-01)
qAC1-2	S1_3329456	-54.849	1	3272839	3276375	+	Os01g0162800	Hypothetical conserved gene. (Os01t0162800-00)
qAC1-2	S1_3329456	-45.469	1	3282977	3284997	-	Os01g0162900	Hypothetical protein. (Os01t0162900-01)
qAC1-2	S1_3329456	-44.6445	1	3283266	3286357	+	Os01g0163000	Leucine-rich repeat, N-terminal domain containing protein. (Os01t0163000-01)
qAC1-2	S1_3329456	-37.0885	1	3291241	3293494	+	Os01g0163450	Hypothetical gene. (Os01t0163450-01)
qAC1-2	S1_3329456	-35.4775	1	3293852	3294105	-	Os01g0163616	Conserved hypothetical protein. (Os01t0163616-00)
qAC1-2	S1_3329456	-16.518	1	3312670	3313206	-	Os01g0164075	Pollen Ole e 1 allergen/extensin domain containing protein. (Os01t0164075-00)
qAC1-2	S1_3329456	-8.713	1	3320451	3321035	-	Os01g0164300	Pollen Ole e 1 allergen/extensin domain containing protein. (Os01t0164300-00)
qAC1-2	S1_3329456	-3.7775	1	3324235	3327122	+	Os01g0164400	Similar to TAF15b (TBP-ASSOCIATED FACTOR 15b); binding / nucleic acid binding / nucleotide binding / zinc ion binding. (Os01t0164400-01)
qAC1-2	S1_3329456	0	1	3328572	3331963	-	Os01g0164500	Similar to ATP-dependent RNA helicase-like protein. (Os01t0164500-01)
qAC1-2	S1_3329456	5.0375	1	3332952	3336035	-	Os01g0164600	Protein phosphatase 2C-related domain containing protein. (Os01t0164600-01)
qAC1-2	S1_3329456	5.7185	1	3334870	3335479	+	Os01g0164650	Non-protein coding transcript. (Os01t0164650-00)
qAC1-2	S1_3329456	10.279	1	3336250	3343220	+	Os01g0164700	Uncharacterised protein family UPF0363 domain containing protein. (Os01t0164700-01)
qAC1-2	S1_3329456	15.662	1	3343531	3346705	-	Os01g0164800	Breast cancer type 2 susceptibility protein domain containing protein. (Os01t0164800-01)
qAC1-2	S1_3329456	24.04	1	3351926	3355066	-	Os01g0164900	BRCA2 repeat containing protein. (Os01t0164900-01)
qAC1-2	S1_3329456	29.3375	1	3356383	3361204	+	Os01g0165000	Transcription factor, Dehydration and salt stress tolerance (Os01t0165000-01);DRE binding protein 2. (Os01t0165000-02)
qAC1-2	S1_3329456	30.148	1	3358534	3360674	-	Os01g0165100	Conserved hypothetical protein. (Os01t0165100-02)
qAC1-2	S1_3329456	30.148	1	3362001	3367658	-	Os01g0165200	Kelch-type beta propeller domain containing protein. (Os01t0165200-01);Similar to KEAP1. (Os01t0165200-02)
qAC12-1	S12_17068981	-79.34	12	16988415	16990867	+	Os12g0472500	Homolog of the Arabidopsis TAPETUM DETERMINANT1 (TPD1) protein, Regulation of early anther cell differentiation (Os12t0472500-01)
qAC12-1	S12_17068981	-58.3175	12	17009383	17011944	-	Os12g0472800	B repeat unit of collagen binding surface protein (cna) containing protein. (Os12t0472800-01)
qAC12-1	S12_17068981	-59.1	12	17009697	17010065	+	Os12g0472900	Hypothetical protein. (Os12t0472900-00)
qAC12-1	S12_17068981	2.1755	12	17070764	17071549	+	Os12g0473900	Similar to Protease inhibitor/seed storage/LTP family protein. (Os12t0473900-00)
qAC6-1	S6_1765761	-89.879	6	1674358	1677406	-	Os06g0131300	Arginine decarboxylase, Chilling stress response (Os06t0131300-01)
qAC6-1	S6_1765761	-89.967	6	1674682	1676906	+	Os06g0131350	Hypothetical gene. (Os06t0131350-00)
qAC6-1	S6_1765761	-72.793	6	1691885	1694051	+	Os06g0131500	Glycoside hydrolase, family 17 protein. (Os06t0131500-01);Similar to glucan endo-1,3-beta-glucosidase 7. (Os06t0131500-02)
qAC6-1	S6_1765761	-64.695	6	1699521	1702611	-	Os06g0131700	Similar to NAM protein. (Os06t0131700-01);No apical meristem (NAM) protein domain containing protein. (Os06t0131700-02)
qAC6-1	S6_1765761	-63.5155	6	1701945	1702546	+	Os06g0131800	Hypothetical protein. (Os06t0131800-00)
qAC6-1	S6_1765761	-53.5575	6	1712173	1712234	+	Os06g0131900	Non-protein coding transcript. (Os06t0131900-00)
qAC6-1	S6_1765761	-48.954	6	1716393	1717221	+	Os06g0132000	Similar to H0315A08.1 protein. (Os06t0132000-00)
qAC6-1	S6_1765761	-36.695	6	1728136	1729996	-	Os06g0132100	Transmembrane receptor, eukaryota domain containing protein. (Os06t0132100-01);Transmembrane receptor, eukaryota domain containing protein. (Os06t0132100-03)
qAC6-1	S6_1765761	-34.6335	6	1730647	1731608	-	Os06g0132200	Non-protein coding transcript. (Os06t0132200-01)
qAC6-1	S6_1765761	-33.568	6	1731821	1732565	-	Os06g0132300	Conserved hypothetical protein. (Os06t0132300-01)
qAC6-1	S6_1765761	-31.539	6	1733988	1734456	-	Os06g0132400	Similar to Magnesium-protoporphyrin O-methyltransferase (EC 2.1.1.11) (Magnesium- protoporphyrin IX methyltransferase). (Os06t0132400-01)
qAC6-1	S6_1765761	-26.109	6	1736723	1742581	-	Os06g0132500	Control of wax biosynthesis (Os06t0132500-01)
qAC6-1	S6_1765761	-8.143	6	1754352	1760884	-	Os06g0132600	Repair protein Rad1/Rec1 domain containing protein. (Os06t0132600-01);Component of the 9-1-1 complex, Promotion of accurate meiotic double-strand break (DSB) repair (Os06t0132600-02)
qAC6-1	S6_1765761	-3.607	6	1761433	1762875	+	Os06g0132801	Hypothetical conserved gene. (Os06t0132801-01)
qAC6-1	S6_1765761	0	6	1765622	1770653	+	Os06g0133000	Granule-bound starch synthase, Synthesis of amylose in endosperm (Os06t0133000-01);Granule-bound starch synthase 1, Starch biosynthesis (Os06t0133000-02)
qAC6-1	S6_1765761	4.239	6	1769541	1770459	-	Os06g0133100	Hypothetical protein. (Os06t0133100-01)
qAC6-1	S6_1765761	11.2775	6	1776726	1777351	+	Os06g0133200	Conserved hypothetical protein. (Os06t0133200-01)
qAC6-1	S6_1765761	14.951	6	1780570	1780854	+	Os06g0133300	Hypothetical conserved gene. (Os06t0133300-00)
qAC6-1	S6_1765761	18.8075	6	1784324	1784813	+	Os06g0133400	Conserved hypothetical protein. (Os06t0133400-01)
qAC6-1	S6_1765761	19.8675	6	1785455	1785802	-	Os06g0133500	Conserved hypothetical protein. (Os06t0133500-00)
qAC6-1	S6_1765761	24.844	6	1789916	1791294	+	Os06g0133600	Phosphate-induced protein 1 conserved region family protein. (Os06t0133600-01);Phosphate-induced protein 1 conserved region family protein. (Os06t0133600-02)
qAC6-1	S6_1765761	44.765	6	1808969	1812083	-	Os06g0133800	Similar to Transferase. (Os06t0133800-01);Similar to Transketolase, chloroplastic. (Os06t0133800-02)
qAC6-1	S6_1765761	52.2455	6	1816266	1819747	+	Os06g0133900	5-enolpyruvylshikimate-3-phosphate synthase (Os06t0133900-01)
qAC6-1	S6_1765761	55.3095	6	1820113	1822028	-	Os06g0134000	Similar to 40S ribosomal protein S20. (Os06t0134000-01)
qAC6-1	S6_1765761	58.835	6	1822809	1826383	-	Os06g0134050	Similar to EMB1067 (EMBRYO DEFECTIVE 1067); tRNA 2'-phosphotransferase. (Os06t0134050-01)
qAC6-1	S6_1765761	68.13	6	1833279	1834503	+	Os06g0134200	Hypothetical conserved gene. (Os06t0134200-01)
qAC6-1	S6_1765761	74.9445	6	1838612	1842799	-	Os06g0134300	Protein of unknown function DUF3615 domain containing protein. (Os06t0134300-01)
qAC6-1	S6_1765761	81.002	6	1844991	1848535	-	Os06g0134400	Protein of unknown function DUF3615 domain containing protein. (Os06t0134400-01)
qAC6-1	S6_1765761	82.633	6	1848037	1848751	+	Os06g0134433	Non-protein coding transcript. (Os06t0134433-01)
qAC6-1	S6_1765761	86.0635	6	1849976	1853673	-	Os06g0134466	Hypothetical conserved gene. (Os06t0134466-01)
qAC6-1	S6_1765761	93.527	6	1857523	1861053	-	Os06g0134500	Protein of unknown function DUF3615 domain containing protein. (Os06t0134500-01)
qAC6-1	S6_1765761	93.527	6	1864573	1868211	+	Os06g0134700	Protein kinase, core domain containing protein. (Os06t0134700-01)
qAC6-2	S6_20854368	-1.966	6	20851191	20853613	-	Os06g0550000	Similar to 60S ribosomal protein L11. (Os06t0550000-00)
qAC6-2	S6_20854368	-1.9405	6	20851295	20853560	+	Os06g0550266	Non-protein coding transcript. (Os06t0550266-00)
qAC8-1	S8_24785382	0	8	24780310	24785986	+	Os08g0501700	Conserved hypothetical protein. (Os08t0501700-01)
qAC8-1	S8_24785382	6.2165	8	24791481	24791716	+	Os08g0501800	Non-protein coding transcript. (Os08t0501800-00)
qGPC11-1	S11_11666233	0.699	11	11666345	11667519	+	Os11g0307550	Conserved hypothetical protein. (Os11t0307550-00)
qGPC12-1	S12_2673221	-100.427	12	2571700	2573888	+	Os12g0152100	Alpha/beta hydrolase fold-1 domain containing protein. (Os12t0152100-01)
qGPC12-1	S12_2673221	-98.2665	12	2574325	2575584	-	Os12g0152200	Cyclin-like F-box domain containing protein. (Os12t0152200-00)
qGPC12-1	S12_2673221	-84.101	12	2588267	2589973	+	Os12g0152500	Hypothetical conserved gene. (Os12t0152500-00)
qGPC12-1	S12_2673221	-79.496	12	2592552	2594898	-	Os12g0152600	Pentatricopeptide repeat domain containing protein. (Os12t0152600-01)
qGPC12-1	S12_2673221	-75.415	12	2595556	2600056	-	Os12g0152700	Amino acid-binding ACT domain containing protein. (Os12t0152700-01);Similar to ACT domain containing protein. (Os12t0152700-02)
qGPC12-1	S12_2673221	-71.71	12	2600996	2602026	-	Os12g0152750	Hypothetical gene. (Os12t0152750-00)
qGPC12-1	S12_2673221	-68.184	12	2602352	2607722	+	Os12g0152800	Rhodanese-like domain containing protein. (Os12t0152800-01);Rhodanese-like domain containing protein. (Os12t0152800-02);Rhodanese-like domain containing protein. (Os12t0152800-03)
qGPC12-1	S12_2673221	-64.073	12	2605807	2612489	-	Os12g0152900	bZIP transcription factor, bZIP-1 domain containing protein. (Os12t0152900-01)
qGPC12-1	S12_2673221	-50.5885	12	2622160	2623105	-	Os12g0153200	Conserved hypothetical protein. (Os12t0153200-01)
qGPC12-1	S12_2673221	-36.9635	12	2635628	2636887	+	Os12g0153400	Cyclin-like F-box domain containing protein. (Os12t0153400-00)
qGPC12-1	S12_2673221	-35.281	12	2637608	2638272	+	Os12g0153433	Hypothetical gene. (Os12t0153433-00)
qGPC12-1	S12_2673221	-28.5765	12	2643975	2645314	+	Os12g0153500	Carbonic anhydrase, CAH1-like domain containing protein. (Os12t0153500-01)
qGPC12-1	S12_2673221	-24.043	12	2647994	2650362	+	Os12g0153600	Conserved hypothetical protein. (Os12t0153600-00)
qGPC12-1	S12_2673221	-22.011	12	2650651	2651769	-	Os12g0153700	Peptidase aspartic, catalytic domain containing protein. (Os12t0153700-00)
qGPC12-1	S12_2673221	-13.2285	12	2659495	2660490	+	Os12g0153900	Conserved hypothetical protein. (Os12t0153900-00)
qGPC12-1	S12_2673221	-8.873	12	2661957	2666739	-	Os12g0154000	Protein of unknown function DUF250 domain containing protein. (Os12t0154000-01);Similar to integral membrane protein like. (Os12t0154000-02)
qGPC12-1	S12_2673221	6.5815	12	2678088	2681517	+	Os12g0154400	t-snare domain containing protein. (Os12t0154400-00)
qGPC12-1	S12_2673221	13.2485	12	2684761	2688178	+	Os12g0154600	Protein of unknown function DUF250 domain containing protein. (Os12t0154600-01);Protein of unknown function DUF250 domain containing protein. (Os12t0154600-02)
qGPC12-1	S12_2673221	16.0715	12	2688759	2689826	-	Os12g0154700	Germin-like protein 12-1, Disease resistance (Os12t0154700-01)
qGPC12-1	S12_2673221	19.8175	12	2692634	2693443	-	Os12g0154800	Germin-like protein 12-2, Disease resistance (Os12t0154800-01)
qGPC12-1	S12_2673221	23.5895	12	2696407	2697214	-	Os12g0154900	Germin-like protein 12-3, Disease resistance (Os12t0154900-00)
qGPC12-1	S12_2673221	26.5025	12	2699175	2700272	-	Os12g0155000	Germin-like protein 12-4, Disease resistance (Os12t0155000-01)
qGPC12-1	S12_2673221	33.0565	12	2705806	2706749	-	Os12g0155100	Protein of unknown function DUF3049 domain containing protein. (Os12t0155100-01)
qGPC12-1	S12_2673221	37.4575	12	2708503	2712854	-	Os12g0155200	Similar to Rac GTPase activating protein. (Os12t0155200-01)
qGPC12-1	S12_2673221	37.7485	12	2708518	2713421	+	Os12g0155250	Hypothetical protein. (Os12t0155250-00)
qGPC12-1	S12_2673221	52.179	12	2724452	2726348	+	Os12g0155300	Conserved hypothetical protein. (Os12t0155300-01)
qGPC12-1	S12_2673221	59.251	12	2732249	2732695	-	Os12g0155400	Similar to Leucine Rich Repeat family protein, expressed. (Os12t0155400-00)
qGPC12-1	S12_2673221	62.414	12	2735598	2735672	+	Os12g0155600	Non-protein coding transcript. (Os12t0155600-00)
qGPC12-1	S12_2673221	79.008	12	2751805	2752653	+	Os12g0156000	A member of S40 gene family, Leaf senescence, Response to pathogen infection (Os12t0156000-01)
qGPC12-1	S12_2673221	89.7395	12	2762322	2763599	+	Os12g0156100	Similar to NAC-domain containing protein 90 (ANAC090). (Os12t0156100-01)
qGPC12-1	S12_2673221	89.7395	12	2768411	2776846	+	Os12g0156200	Similar to DNA-binding factor of bZIP class. (Os12t0156200-00)
qGT3-1	S3_13235693	-35.425	3	13199226	13201310	-	Os03g0351800	Zinc finger, RING/FYVE/PHD-type domain containing protein. (Os03t0351800-01)
qGT3-1	S3_13235693	-15.5845	3	13218051	13222166	+	Os03g0352200	Similar to SAC3/GANP family protein. (Os03t0352200-01)
qGT3-1	S3_13235693	-11.6835	3	13222543	13225476	-	Os03g0352300	Similar to Nucleolar protein. (Os03t0352300-01);Similar to nucleolar protein Nop56. (Os03t0352300-02);Similar to nucleolar protein Nop56. (Os03t0352300-03)
qGT3-1	S3_13235693	-5.997	3	13227322	13232070	+	Os03g0352400	Similar to Nucleolar GTP-binding protein 2 (Autoantigen NGP-1). (Os03t0352400-01)
qGT3-1	S3_13235693	6.5885	3	13236683	13247880	+	Os03g0352500	Chromatin-remodeling factor, Regulation of gibberellin biosynthesis, Plant growth and development (Os03t0352500-01)
qGT3-1	S3_13235693	21.9755	3	13256889	13258448	+	Os03g0352700	Hypothetical conserved gene. (Os03t0352700-00)
qGT3-1	S3_13235693	23.753	3	13258254	13260638	-	Os03g0352800	Similar to Acyl carrier protein 1 (EC 1.6.5.3) (EC 1.6.99.3). (Os03t0352800-01)
qGT3-1	S3_13235693	28.124	3	13263190	13264444	+	Os03g0353000	Conserved hypothetical protein. (Os03t0353000-01)
qGT3-1	S3_13235693	38.63	3	13273396	13275250	+	Os03g0353300	Similar to F-box domain containing protein, expressed. (Os03t0353300-01)
qGT3-1	S3_13235693	40.67	3	13276176	13276550	-	Os03g0353333	Similar to Acyl carrier protein. (Os03t0353333-00)
qGT3-1	S3_13235693	48.1595	3	13283192	13284513	+	Os03g0353400	Similar to Poly(A)-binding protein C-terminal interacting protein 6. (Os03t0353400-01);Similar to Early response to dehydration 15-like protein. (Os03t0353400-02)
qGT3-1	S3_13235693	54.7	3	13289325	13291461	+	Os03g0353500	Nucleolar protein 12 domain containing protein. (Os03t0353500-01)
qGT3-1	S3_13235693	68.103	3	13301955	13305637	+	Os03g0353600	Similar to Aberrant pollen transmission 1. (Os03t0353600-01)
qGT3-1	S3_13235693	73.307	3	13308292	13309708	+	Os03g0353701	Similar to aberrant pollen transmission 1. (Os03t0353701-01)
qGT3-3	S3_16312643	-48.591	3	16262868	16265236	-	Os03g0400800	Similar to Leucine Rich Repeat family protein, expressed. (Os03t0400800-00)
qGT3-3	S3_16312643	-52.1155	3	16259903	16261152	-	Os03g0400901	Hypothetical conserved gene. (Os03t0400901-00)
qGT3-3	S3_16312643	-26.013	3	16282782	16290478	+	Os03g0401100	Similar to Protein kinase domain containing protein, expressed. (Os03t0401100-01)
qGT3-3	S3_16312643	-17.191	3	16293784	16297120	-	Os03g0401200	Similar to DnaJ homolog subfamily B member 4 (Heat shock 40 kDa protein 1 homolog) (Heat shock protein 40 homolog) (HSP40 homolog). (Os03t0401200-01)
qGT3-3	S3_16312643	-8.959	3	16301279	16306089	-	Os03g0401300	Sucrose synthase 2 (EC 2.4.1.13) (Sucrose-UDP glucosyltransferase 2). (Os03t0401300-01);Similar to Sucrose synthase 1. (Os03t0401300-02);Similar to Sucrose synthase metabolism (Fragment). (Os03t0401300-03)
qGT3-3	S3_16312643	-8.7545	3	16301696	16306081	+	Os03g0401333	Hypothetical protein. (Os03t0401333-00)
qGT3-3	S3_16312643	-5.403	3	16306856	16307624	-	Os03g0401366	Non-protein coding transcript. (Os03t0401366-01)
qGT4-1	S4_13968254	-102.228	4	13862793	13869259	-	Os04g0307466	Conserved hypothetical protein. (Os04t0307466-01)
qGT4-1	S4_13968254	-102.513	4	13863222	13868260	+	Os04g0307500	Similar to OSIGBa0113B06.2 protein. (Os04t0307500-01)
qGT4-1	S4_13968254	-75.9385	4	13890220	13894411	-	Os04g0307800	Myb-related protein P, C-terminal domain containing protein. (Os04t0307800-00)
qGT4-1	S4_13968254	-53.7885	4	13913869	13915062	+	Os04g0307900	Similar to H0211A12.1 protein. (Os04t0307900-00)
qGT4-1	S4_13968254	-44.7925	4	13918556	13928367	-	Os04g0308000	Conserved hypothetical protein. (Os04t0308000-01);Non-protein coding transcript. (Os04t0308000-02);Non-protein coding transcript. (Os04t0308000-03)
qGT4-1	S4_13968254	-43.7525	4	13923888	13925115	+	Os04g0308100	Similar to Wall-associated kinase 4. (Os04t0308100-01)
qGT4-1	S4_13968254	-32.3915	4	13934207	13937518	-	Os04g0308400	Similar to H0211A12.13 protein. (Os04t0308400-00)
qGT4-1	S4_13968254	-29.7185	4	13937943	13939128	+	Os04g0308500	Similar to H0211A12.12 protein. (Os04t0308500-01)
qGT4-1	S4_13968254	-18.572	4	13949076	13950288	-	Os04g0308600	Similar to H0211A12.11 protein. (Os04t0308600-00)
qGT4-1	S4_13968254	27.433	4	13993817	13997557	-	Os04g0309100	Similar to NADH dehydrogenase subunit 2. (Os04t0309100-01)
qGT4-1	S4_13968254	36.6695	4	14003852	14005995	-	Os04g0309400	Conserved hypothetical protein. (Os04t0309400-01);Non-protein coding transcript. (Os04t0309400-02)
qGT4-1	S4_13968254	37.3755	4	14004989	14006270	+	Os04g0309500	Conserved hypothetical protein. (Os04t0309500-01)
qGT4-1	S4_13968254	42.59	4	14008245	14013443	+	Os04g0309600	Similar to Sucrose synthase. (Os04t0309600-01)
qGT4-1	S4_13968254	42.9755	4	14009966	14012493	-	Os04g0309751	Hypothetical protein. (Os04t0309751-00)
qGT4-1	S4_13968254	60.32	4	14027961	14029187	+	Os04g0309900	Similar to H0211A12.5 protein. (Os04t0309900-00)
qGT4-1	S4_13968254	71.2355	4	14038897	14040082	-	Os04g0310100	Similar to H0211A12.12 protein. (Os04t0310100-01)
qGT4-1	S4_13968254	72.73	4	14040507	14041461	+	Os04g0310200	Similar to H0211A12.13 protein. (Os04t0310200-00)
qGT4-1	S4_13968254	90.5265	4	14056535	14061026	+	Os04g0310400	Similar to H0211A12.15 protein. (Os04t0310400-00)
qGT4-1	S4_13968254	97.0855	4	14062656	14068023	-	Os04g0310500	NADH dehydrogenase [ubiquinone] (complex I), alpha subcomplex, subunit 2 domain containing protein. (Os04t0310500-01);NADH dehydrogenase [ubiquinone] (complex I), alpha subcomplex, subunit 2 domain containing protein. (Os04t0310500-02)
qGT4-2	S4_24196718	-99.522	4	24096146	24098246	+	Os04g0481700	Similar to MDR-like ABC transporter. (Os04t0481700-01)
qGT4-2	S4_24196718	-97.747	4	24098311	24099631	-	Os04g0481800	Membrane bound O-acyl transferase, MBOAT family protein. (Os04t0481800-01)
qGT4-2	S4_24196718	-94.7355	4	24101427	24102538	-	Os04g0481900	Similar to H0510A06.12 protein. (Os04t0481900-00)
qGT4-2	S4_24196718	-92.77	4	24103028	24104868	-	Os04g0482000	Similar to Peptide methionine sulfoxide reductase. (Os04t0482000-01)
qGT4-2	S4_24196718	-86.5675	4	24109091	24111210	-	Os04g0482100	Similar to H0510A06.16 protein. (Os04t0482100-00)
qGT4-2	S4_24196718	-79.6615	4	24115971	24118142	+	Os04g0482300	Kelch related domain containing protein. (Os04t0482300-01)
qGT4-2	S4_24196718	-70.7935	4	24125484	24126365	-	Os04g0482600	Hypothetical conserved gene. (Os04t0482600-01)
qGT4-2	S4_24196718	-65.307	4	24129561	24133261	-	Os04g0482700	Similar to H0525D09.10 protein. (Os04t0482700-01)
qGT4-2	S4_24196718	-60.516	4	24134006	24138398	-	Os04g0482800	Similar to Topoisomerase-like protein. (Os04t0482800-01)
qGT4-2	S4_24196718	-55.8295	4	24139367	24142410	-	Os04g0482900	Similar to H0525D09.12 protein. (Os04t0482900-01)
qGT4-2	S4_24196718	-53.324	4	24142868	24143920	+	Os04g0482950	Hypothetical gene. (Os04t0482950-00)
qGT4-2	S4_24196718	-49.902	4	24145933	24147699	+	Os04g0483000	Similar to H0525D09.13 protein. (Os04t0483000-01)
qGT4-2	S4_24196718	-37.9115	4	24156588	24161025	+	Os04g0483200	Steroid nuclear receptor, ligand-binding domain containing protein. (Os04t0483200-01);Similar to H0805A05.1 protein. (Os04t0483200-02)
qGT4-2	S4_24196718	-33.41	4	24161435	24165181	-	Os04g0483400	Similar to H0805A05.2 protein. (Os04t0483400-01)
qGT4-2	S4_24196718	-27.0055	4	24168477	24170948	+	Os04g0483450	Hypothetical conserved gene. (Os04t0483450-00)
qGT4-2	S4_24196718	-19.4175	4	24175649	24178952	-	Os04g0483500	Beta-ketoacyl-CoA reductase, Cuticular wax biosynthesis, Fatty acid elongation (Os04t0483500-01)
qGT4-2	S4_24196718	-19.476	4	24175898	24178586	+	Os04g0483550	Hypothetical gene. (Os04t0483550-00)
qGT4-2	S4_24196718	-12.6855	4	24180805	24187260	-	Os04g0483600	Kelch-type beta propeller domain containing protein. (Os04t0483600-01);Hypothetical conserved gene. (Os04t0483600-02)
qGT4-2	S4_24196718	19.0245	4	24213841	24217644	-	Os04g0484300	Conserved hypothetical protein. (Os04t0484300-01)
qGT4-2	S4_24196718	36.3585	4	24229248	24236905	+	Os04g0484800	Cullin family protein. (Os04t0484800-01)
qGT4-2	S4_24196718	36.157	4	24229260	24236490	-	Os04g0484850	Hypothetical protein. (Os04t0484850-00)
qGT4-2	S4_24196718	42.227	4	24237179	24240711	-	Os04g0484900	Similar to Kluyveromyces lactis strain NRRL Y-1140 omosome E of strain NRRL Y- 1140 of Kluyveromyces lactis. (Os04t0484900-01)
qGT4-2	S4_24196718	45.5935	4	24240921	24243702	+	Os04g0485000	Similar to 26S proteasome subunit RPN7. (Os04t0485000-01)
qGT4-2	S4_24196718	49.151	4	24243991	24247747	-	Os04g0485100	Similar to Protein phosphatase 2A B' regulatory subunit. (Os04t0485100-01);Similar to Protein phosphatase 2A B' regulatory subunit. (Os04t0485100-02)
qGT4-2	S4_24196718	58.6785	4	24253332	24257461	+	Os04g0485200	UBX domain containing protein. (Os04t0485200-01)
qGT4-2	S4_24196718	67.8995	4	24261434	24267801	+	Os04g0485300	Glucose-6-phosphate dehydrogenase. (Os04t0485300-01);Glucose-6-phosphate dehydrogenase. (Os04t0485300-02);Similar to Glucose-6-phosphate 1-dehydrogenase. (Os04t0485300-03);Similar to Glucose-6-phosphate 1-dehydrogenase. (Os04t0485300-04)
qGT4-2	S4_24196718	72.309	4	24267885	24270169	-	Os04g0485400	Similar to Nucleotide-binding protein. (Os04t0485400-01);Similar to nucleotide-binding protein 1. (Os04t0485400-02)
qGT4-2	S4_24196718	76.1835	4	24272538	24273265	+	Os04g0485500	Similar to Mitochondrial GTPase. (Os04t0485500-00)
qGT4-2	S4_24196718	76.7095	4	24272874	24273981	-	Os04g0485601	Hypothetical gene. (Os04t0485601-00)
qGT4-2	S4_24196718	81.545	4	24278127	24278399	+	Os04g0485700	Similar to Exonuclease. (Os04t0485700-01)
qGT4-2	S4_24196718	84.715	4	24279601	24283265	-	Os04g0485800	Cyclin-like F-box domain containing protein. (Os04t0485800-01);Cyclin-like F-box domain containing protein. (Os04t0485800-02)
qGT4-2	S4_24196718	98.1715	4	24294058	24295721	+	Os04g0486300	Protein of unknown function DUF295 family protein. (Os04t0486300-01)
qGT4-2	S4_24196718	98.1715	4	24296430	24300623	-	Os04g0486350	Hypothetical protein. (Os04t0486350-00)
qGT4-2	S4_24196718	98.1715	4	24296458	24301208	+	Os04g0486400	RML1 protein. (Os04t0486400-01)
qGT6-1	S6_2195964	-43.6975	6	2151949	2152584	-	Os06g0140900	Sigma factor, regions 3 and 4 domain containing protein. (Os06t0140900-01)
qGT6-1	S6_2195964	-42.4685	6	2152827	2154164	+	Os06g0140950	Non-protein coding transcript. (Os06t0140950-01)
qGT6-1	S6_2195964	-40.0675	6	2155077	2156716	-	Os06g0141100	Monosaccharide transporter. (Os06t0141100-00)
qGT6-1	S6_2195964	-40.15	6	2155115	2156513	+	Os06g0141133	Hypothetical protein. (Os06t0141133-00)
qGT6-1	S6_2195964	-36.7245	6	2157903	2160576	-	Os06g0141166	Similar to hydrolase, NUDIX family protein. (Os06t0141166-00)
qGT6-1	S6_2195964	-32.02	6	2162738	2165150	-	Os06g0141200	Similar to RNA-binding protein EWS. (Os06t0141200-01)
qGT6-1	S6_2195964	-23.7825	6	2170963	2173400	-	Os06g0141400	Similar to Early nodulin. (Os06t0141400-01)
qGT6-1	S6_2195964	-19.547	6	2175908	2176926	-	Os06g0141600	Early nodulin 93 ENOD93 protein family protein. (Os06t0141600-01)
qGT6-1	S6_2195964	-15.282	6	2180250	2181114	-	Os06g0141700	Similar to Early nodulin. (Os06t0141700-01)
qGT6-1	S6_2195964	-10.622	6	2184690	2185994	+	Os06g0141800	Similar to fasciclin-like arabinogalactan protein 8. (Os06t0141800-01)
qGT6-1	S6_2195964	-8.2015	6	2187658	2187867	-	Os06g0141950	Similar to MYB transcription factor. (Os06t0141950-00)
qGT6-1	S6_2195964	-5.9995	6	2188410	2191519	+	Os06g0142000	Hypothetical conserved gene. (Os06t0142000-00)
qGT6-1	S6_2195964	-1.764	6	2193618	2194782	+	Os06g0142050	Similar to H0913C04.9 protein. (Os06t0142050-00)
qGT6-1	S6_2195964	0	6	2195353	2198373	+	Os06g0142100	Cyclin-like F-box domain containing protein. (Os06t0142100-00)
qGT6-1	S6_2195964	3.9495	6	2199361	2200466	-	Os06g0142200	Early nodulin. (Os06t0142200-01);Similar to cDNA clone:J033147G13, full insert sequence. (Os06t0142200-02)
qGT6-1	S6_2195964	10.1655	6	2205750	2206509	-	Os06g0142300	Early nodulin 93 ENOD93 protein family protein. (Os06t0142300-00)
qGT6-2	S6_6687883	-3.691	6	6682437	6685947	-	Os06g0228600	Similar to Amino acid carrier. (Os06t0228600-01)
qGT6-2	S6_6687883	-4.231	6	6682637	6684667	+	Os06g0228666	Hypothetical protein. (Os06t0228666-00)
qGT6-2	S6_6687883	0.1065	6	6687892	6688087	-	Os06g0228732	Non-protein coding transcript. (Os06t0228732-00)
qGT6-3	S6_6830286	-12.181	6	6816406	6819804	-	Os06g0232000	Similar to Pro-resilin. (Os06t0232000-01);Hypothetical conserved gene. (Os06t0232000-02);Similar to Pro-resilin. (Os06t0232000-03)
qGT6-3	S6_6830286	0	6	6823036	6832862	-	Os06g0232100	Hypothetical conserved gene. (Os06t0232100-01);Protein kinase, core domain containing protein. (Os06t0232100-02);Hypothetical conserved gene. (Os06t0232100-03);Similar to predicted protein. (Os06t0232100-04)
qGT8-1	S8_4750713	-56.0695	8	4692655	4696632	+	Os08g0180100	Similar to SET domain-containing protein. (Os08t0180100-01);Similar to SET domain protein. (Os08t0180100-02)
qGT8-1	S8_4750713	-46.202	8	4700668	4708354	+	Os08g0180300	DEAD-like helicase, N-terminal domain containing protein. (Os08t0180300-01);Hypothetical conserved gene. (Os08t0180300-02);DEAD-like helicase, N-terminal domain containing protein. (Os08t0180300-03)
qGT8-1	S8_4750713	-40.731	8	4709755	4710209	+	Os08g0180400	Similar to Kinesin-like protein. (Os08t0180400-00)
qGT8-1	S8_4750713	-35.0135	8	4713705	4717694	+	Os08g0180500	Zinc finger, BED-type predicted domain containing protein. (Os08t0180500-00)
qGT8-1	S8_4750713	-31.8605	8	4718736	4718969	-	Os08g0180950	Hypothetical conserved gene. (Os08t0180950-00)
qGT8-1	S8_4750713	25.695	8	4774914	4777902	+	Os08g0181750	Conserved hypothetical protein. (Os08t0181750-01)
qGT8-1	S8_4750713	28.592	8	4779112	4779498	-	Os08g0181925	Conserved hypothetical protein. (Os08t0181925-00)
qGT8-1	S8_4750713	68.617	8	4817967	4820693	+	Os08g0182400	Conserved hypothetical protein. (Os08t0182400-01)
qGT8-2	S8_20763355	-93.4565	8	20666240	20673557	-	Os08g0428900	Chaperonin Cpn60/TCP-1 family protein. (Os08t0428900-01)
qGT8-2	S8_20763355	-64.6405	8	20698420	20699009	-	Os08g0429200	Non-protein coding transcript. (Os08t0429200-01)
qGT8-2	S8_20763355	-60.555	8	20702501	20703099	+	Os08g0429225	Hypothetical protein. (Os08t0429225-00)
qGT8-2	S8_20763355	0	8	20761382	20764018	-	Os08g0429800	Hypothetical conserved gene. (Os08t0429800-00)
qGT8-2	S8_20763355	2.714	8	20765701	20766437	-	Os08g0429901	Non-protein coding transcript. (Os08t0429901-00)
qGT8-2	S8_20763355	15.889	8	20776099	20782389	-	Os08g0430000	Conserved hypothetical protein. (Os08t0430000-01);Hypothetical conserved gene. (Os08t0430000-02)
qGT8-2	S8_20763355	21.2345	8	20781931	20787248	+	Os08g0430050	Conserved hypothetical protein. (Os08t0430050-01)
qGT8-2	S8_20763355	29.1655	8	20790427	20794614	+	Os08g0430100	Similar to Myosin-like protein. (Os08t0430100-01)
qGT8-2	S8_20763355	36.0095	8	20797021	20801708	+	Os08g0430200	UV excision repair protein Rad23 family protein. (Os08t0430200-01);Similar to DNA repair protein RAD23. (Os08t0430200-02)
qGT8-2	S8_20763355	40.459	8	20802532	20805096	-	Os08g0430300	Conserved hypothetical protein. (Os08t0430300-01)
qGT8-2	S8_20763355	50.71	8	20812503	20815627	-	Os08g0430500	14-3-3 protein, Florigen receptor, Flowering (Os08t0430500-01);Similar to 14-3-3-like protein S94. (Os08t0430500-02);Similar to 14-3-3-like protein GF14-C. (Os08t0430500-03)
qGT8-2	S8_20763355	50.4255	8	20813065	20814496	+	Os08g0430550	Non-protein coding transcript. (Os08t0430550-00)
qGT8-2	S8_20763355	55.484	8	20817234	20820444	-	Os08g0430600	Similar to Threonine endopeptidase. (Os08t0430600-01);Similar to Threonine endopeptidase. (Os08t0430600-02)
qGT8-2	S8_20763355	59.558	8	20820938	20824888	-	Os08g0430700	Similar to UVB-resistance protein-like. (Os08t0430700-01);Similar to UVB-resistance protein-like. (Os08t0430700-02)
qGT8-2	S8_20763355	66.4365	8	20828249	20831334	+	Os08g0430800	Conserved hypothetical protein. (Os08t0430800-01);Conserved hypothetical protein. (Os08t0430800-02)
qGT8-2	S8_20763355	87.1615	8	20848026	20853007	+	Os08g0431100	Bromo adjacent region domain containing protein. (Os08t0431100-01);Bromo adjacent region domain containing protein. (Os08t0431100-02);Hypothetical conserved gene. (Os08t0431100-03);Hypothetical conserved gene. (Os08t0431100-04)
qGT8-2	S8_20763355	93.4315	8	20855158	20858415	+	Os08g0431200	Similar to Formin-like protein 9. (Os08t0431200-00)
qGT8-2	S8_20763355	97.189	8	20858831	20862257	-	Os08g0431300	Similar to Dihydrolipoamide S-acetyltransferase. (Os08t0431300-01)
qGV12-1	S12_21773741	-6.671	12	21766760	21767380	+	Os12g0542300	Conserved hypothetical protein. (Os12t0542300-00)
qGV3-1	S3_8210958	0	3	8207583	8211913	-	Os03g0255200	Heat shock protein DnaJ, N-terminal domain containing protein. (Os03t0255200-01);Heat shock protein DnaJ, N-terminal domain containing protein. (Os03t0255200-02)
qGV3-1	S3_8210958	4.12	3	8212498	8217658	+	Os03g0255400	FAR1 domain containing protein. (Os03t0255400-01)
qGV3-1	S3_8210958	10.5545	3	8218898	8224127	-	Os03g0255500	Similar to Phosphoenolpyruvate carboxykinase 4 (EC 4.1.1.49) (Fragment). (Os03t0255500-01);Similar to Phosphoenolpyruvate carboxykinase. (Os03t0255500-02)
qGV3-1	S3_8210958	30.8645	3	8241532	8242113	-	Os03g0255900	Conserved hypothetical protein. (Os03t0255900-01)
qGV3-1	S3_8210958	47.231	3	8255582	8260796	-	Os03g0256400	Similar to Imidazole glycerol phosphate synthase hisHF, chloroplast precursor (IGP synthase) (ImGP synthase) (IGPS) [Includes: Glutamine amidotransferase (EC 2.4.2.-); Cyclase (EC 4.1.3.-)]. (Os03t0256400-01)
qGV3-1	S3_8210958	89.5255	3	8294652	8306315	-	Os03g0256800	Similar to RhoGAP domain containing protein, expressed. (Os03t0256800-00)
qGV3-1	S3_8210958	98.426	3	8307296	8311472	-	Os03g0257000	Conserved hypothetical protein. (Os03t0257000-01)
qGV3-2	S3_16733441	0	3	16729501	16735109	-	Os03g0407400	Protein with plant-specific organ size regulation (OSR) domain, transmembrane region, TNFR/NGFR family cysteine-rich domain and VWFC module, Regulator of grain size and organ size (Os03t0407400-01)
qGV7-1	S7_24413754	0	7	24403350	24416683	+	Os07g0598300	Hypothetical conserved gene. (Os07t0598300-01);Hypothetical conserved gene. (Os07t0598300-02);DEAD-like helicase, N-terminal domain containing protein. (Os07t0598300-03)
qGV7-1	S7_24413754	4.658	7	24417383	24419441	-	Os07g0598400	Glycoside hydrolase family 79, N-terminal protein. (Os07t0598400-01)
qGV7-1	S7_24413754	4.968	7	24418124	24419320	+	Os07g0598450	Hypothetical protein. (Os07t0598450-00)
qGV7-1	S7_24413754	7.347	7	24419887	24422315	-	Os07g0598500	Pentatricopeptide repeat domain containing protein. (Os07t0598500-01)
qGV7-1	S7_24413754	17.011	7	24429316	24432214	-	Os07g0598700	Hypothetical conserved gene. (Os07t0598700-00)
qGV7-1	S7_24413754	25.779	7	24438591	24440475	+	Os07g0598800	Hypothetical conserved gene. (Os07t0598800-00)
qGV7-1	S7_24413754	35.063	7	24446289	24451345	+	Os07g0598900	Similar to T1K7.11 protein. (Os07t0598900-01);Hypothetical conserved gene. (Os07t0598900-02)
qGV7-1	S7_24413754	39.85	7	24451634	24455574	+	Os07g0599000	Pentatricopeptide repeat domain containing protein. (Os07t0599000-01)
qGV7-1	S7_24413754	39.85	7	24456130	24459917	-	Os07g0599100	Hypothetical conserved gene. (Os07t0599100-00)
qGV7-1	S7_24413754	39.85	7	24457010	24459903	+	Os07g0599150	Hypothetical protein. (Os07t0599150-00)
qLWR3-1	S3_5210399	-97.2155	3	5112590	5113777	-	Os03g0197175	Hypothetical gene. (Os03t0197175-00)
qLWR3-1	S3_5210399	-96.898	3	5112964	5114038	+	Os03g0197200	Similar to Sorbitol transporter. (Os03t0197200-01)
qLWR3-1	S3_5210399	-92.6575	3	5116435	5119048	+	Os03g0197300	Similar to Cupin family protein, expressed. (Os03t0197300-01)
qLWR3-1	S3_5210399	-88.44	3	5119305	5124613	-	Os03g0197400	Similar to COP9 signalosome complex subunit 4 (Signalosome subunit 4) (Constitutive photomorphogenesis protein 8) (FUSCA protein 4) (FUSCA4) (AtS4). (Os03t0197400-01);Similar to COP9 signalosome complex subunit 4 (Signalosome subunit 4) (Constitutive photomorphogenesis protein 8) (FUSCA protein 4) (FUSCA4) (AtS4). (Os03t0197400-02)
qLWR3-1	S3_5210399	-74.474	3	5134409	5137441	+	Os03g0197800	Similar to Zinc finger, C2H2 type family protein, expressed. (Os03t0197800-00)
qLWR3-1	S3_5210399	-75.4405	3	5134811	5135106	-	Os03g0197825	Hypothetical protein. (Os03t0197825-00)
qLWR3-1	S3_5210399	-73.7365	3	5135959	5137366	-	Os03g0197850	Hypothetical gene. (Os03t0197850-00)
qLWR3-1	S3_5210399	-66.8245	3	5143551	5143598	+	Os03g0197875	Non-protein coding transcript. (Os03t0197875-00)
qLWR3-1	S3_5210399	-58.897	3	5150966	5152038	-	Os03g0197900	Protein of unknown function DUF623, plant domain containing protein. (Os03t0197900-01)
qLWR3-1	S3_5210399	-50.4495	3	5159637	5160262	-	Os03g0198200	Hypothetical protein. (Os03t0198200-01)
qLWR3-1	S3_5210399	-46.274	3	5161642	5166608	+	Os03g0198300	Heat shock protein DnaJ, N-terminal domain containing protein. (Os03t0198300-01);Heat shock protein DnaJ, N-terminal domain containing protein. (Os03t0198300-02)
qLWR3-1	S3_5210399	-41.3985	3	5167307	5170694	+	Os03g0198400	Similar to Seryl-tRNA synthetase (EC 6.1.1.11) (Serine--tRNA ligase) (SerRS) (Fragment). (Os03t0198400-01)
qLWR3-1	S3_5210399	-41.593	3	5167339	5170273	-	Os03g0198433	Non-protein coding transcript. (Os03t0198433-00)
qLWR3-1	S3_5210399	-33.2195	3	5175138	5179221	+	Os03g0198500	Protein of unknown function DUF862, eukaryotic domain containing protein. (Os03t0198500-01);Protein of unknown function DUF862, eukaryotic domain containing protein. (Os03t0198500-02);Protein of unknown function DUF862, eukaryotic domain containing protein. (Os03t0198500-03)
qLWR3-1	S3_5210399	-28.917	3	5180779	5182185	-	Os03g0198600	Homeodomain-leucine zipper transcription factor, Regulation of panicle exsertion (Os03t0198600-01)
qLWR3-1	S3_5210399	-7.076	3	5200218	5206428	-	Os03g0198900	Hypothetical conserved gene. (Os03t0198900-01);Methyladenine glycosylase domain containing protein. (Os03t0198900-02)
qLWR3-1	S3_5210399	0	3	5206265	5211363	+	Os03g0199000	UAA transporter domain containing protein. (Os03t0199000-01)
qLWR3-1	S3_5210399	0	3	5206587	5211073	-	Os03g0199050	Hypothetical protein. (Os03t0199050-00)
qLWR3-1	S3_5210399	5.4855	3	5214115	5217654	+	Os03g0199100	Protein of unknown function DUF677 family protein. (Os03t0199100-01)
qLWR3-1	S3_5210399	8.5195	3	5218194	5219643	-	Os03g0199200	Conserved hypothetical protein. (Os03t0199200-01)
qLWR3-1	S3_5210399	8.765	3	5218609	5219719	+	Os03g0199300	Conserved hypothetical protein. (Os03t0199300-01)
qLWR3-1	S3_5210399	15.3875	3	5225077	5226496	-	Os03g0199500	Conserved hypothetical protein. (Os03t0199500-01)
qLWR3-1	S3_5210399	22.906	3	5232956	5233654	+	Os03g0199800	Similar to H0315A08.1 protein. (Os03t0199800-00)
qLWR3-1	S3_5210399	43.7395	3	5253519	5254758	+	Os03g0200000	Similar to Haemolysin-III related family protein, expressed. (Os03t0200000-00)
qLWR3-1	S3_5210399	43.8195	3	5253727	5254710	-	Os03g0200100	Hypothetical protein. (Os03t0200100-00)
qLWR3-1	S3_5210399	52.2905	3	5261710	5263669	+	Os03g0200200	Conserved hypothetical protein. (Os03t0200200-01)
qLWR3-1	S3_5210399	61.3885	3	5271246	5272329	+	Os03g0200400	Conserved hypothetical protein. (Os03t0200400-01)
qLWR3-1	S3_5210399	65.6335	3	5274929	5277136	+	Os03g0200500	40S ribosomal protein S3a (CYC07 protein). (Os03t0200500-01);Similar to 40S ribosomal protein S3a. (Os03t0200500-02)
qLWR3-1	S3_5210399	68.86	3	5277687	5280831	-	Os03g0200600	Similar to predicted protein. (Os03t0200600-00)
qLWR3-1	S3_5210399	74.7525	3	5283459	5286844	-	Os03g0200700	Similar to Surfeit 1 homolog. (Os03t0200700-01);Similar to SURF1. (Os03t0200700-02)
qLWR3-1	S3_5210399	78.682	3	5287681	5290481	-	Os03g0200800	ARF/SAR superfamily domain containing protein. (Os03t0200800-01)
qLWR3-1	S3_5210399	85.371	3	5294523	5297017	+	Os03g0201000	Conserved hypothetical protein. (Os03t0201000-01)
qLWR3-1	S3_5210399	88.943	3	5297336	5301348	-	Os03g0201100	Similar to Cyclophilin-like protein PPIL3b. (Os03t0201100-01)
qLWR3-1	S3_5210399	93.1965	3	5302428	5304763	+	Os03g0201200	Conserved hypothetical protein. (Os03t0201200-01);Hypothetical conserved gene. (Os03t0201200-02)
qLWR3-1	S3_5210399	93.1965	3	5304942	5314273	+	Os03g0201400	Pentatricopeptide repeat domain containing protein. (Os03t0201400-01);Pentatricopeptide repeat domain containing protein. (Os03t0201400-02)
qLWR3-2	S3_16733441	0	3	16729501	16735109	-	Os03g0407400	Protein with plant-specific organ size regulation (OSR) domain, transmembrane region, TNFR/NGFR family cysteine-rich domain and VWFC module, Regulator of grain size and organ size (Os03t0407400-01)
qLWR3-3	S3_16749510	0	3	16749318	16754223	-	Os03g0407900	Similar to Serine/threonine protein kinase-like. (Os03t0407900-01)
qLWR3-3	S3_16749510	2.099	3	16749739	16753479	+	Os03g0408101	Hypothetical protein. (Os03t0408101-00)
qLWR4-2	S4_24917693	0	4	24915054	24918786	+	Os04g0498600	S-adenosylmethionine decarboxylase, Polyamine biosynthesis, Salt and drought stresses, Abiotic stress (Os04t0498600-01);Similar to cDNA clone:J013002M21, full insert sequence. (Os04t0498600-02)
qLWR4-2	S4_24917693	0	4	24916227	24918098	-	Os04g0498650	Hypothetical gene. (Os04t0498650-00)
qLWR4-2	S4_24917693	4.8755	4	24920483	24924654	-	Os04g0498700	Haem peroxidase family protein. (Os04t0498700-01);Haem peroxidase family protein. (Os04t0498700-02)
qLWR4-2	S4_24917693	4.7315	4	24920581	24924268	+	Os04g0498725	Hypothetical protein. (Os04t0498725-00)
qLWR4-2	S4_24917693	16.321	4	24932120	24935908	+	Os04g0498800	Similar to Cell division control protein 48 homolog B (AtCDC48b). (Os04t0498800-01)
qLWR4-2	S4_24917693	19.728	4	24936060	24938782	-	Os04g0498900	Similar to N-acetyltransferase ESCO1. (Os04t0498900-01)
qLWR4-2	S4_24917693	24.1135	4	24940515	24943098	+	Os04g0499100	Biopterin transport-related protein BT1 family protein. (Os04t0499100-01)
qLWR4-2	S4_24917693	23.259	4	24940204	24941700	-	Os04g0499150	Non-protein coding transcript. (Os04t0499150-00)
qLWR4-2	S4_24917693	26.4785	4	24943121	24945222	-	Os04g0499200	Enhancer of rudimentary family protein. (Os04t0499200-01)
qLWR4-2	S4_24917693	31.5315	4	24946171	24952278	-	Os04g0499300	MIF4-like, type 1/2/3 domain containing protein. (Os04t0499300-01);Similar to Eukaryotic initiation factor-like protein. (Os04t0499300-02)
qLWR4-2	S4_24917693	31.5535	4	24946269	24952224	+	Os04g0499500	Hypothetical protein. (Os04t0499500-00)
qLWR4-2	S4_24917693	47.122	4	24963088	24966542	+	Os04g0499800	Hypothetical protein. (Os04t0499800-01)
qLWR5-1	S5_5371772	-5.8605	5	5365122	5366701	+	Os05g0187500	IQ calmodulin-binding motif family protein, Positive regulator of brassinosteroid signalling, Regulation of grain width and weight (Os05t0187500-01)
qLWR5-2	S5_28480050	-7.624	5	28471802	28473050	+	Os05g0571200	Similar to WRKY transcription factor 19. (Os05t0571200-01)
qLWR5-2	S5_28480050	-4.6975	5	28473568	28477137	-	Os05g0571300	Conserved hypothetical protein. (Os05t0571300-01);Protein of unknown function DUF3615 domain containing protein. (Os05t0571300-02);Hypothetical conserved gene. (Os05t0571300-03)
qLWR5-2	S5_28480050	0	5	28478301	28482901	-	Os05g0571400	Protein of unknown function DUF3593 domain containing protein. (Os05t0571400-01);Hypothetical conserved gene. (Os05t0571400-02)
qLWR5-3	S5_28487739	0	5	28487243	28488200	+	Os05g0571600	Conserved hypothetical protein. (Os05t0571600-01)
qLWR5-3	S5_28487739	4.0295	5	28489736	28493801	-	Os05g0571700	Cyclin-like F-box domain containing protein. (Os05t0571700-01)
qLWR5-3	S5_28487739	6.8105	5	28494216	28494883	+	Os05g0571800	Similar to H0402C08.3 protein. (Os05t0571800-01)
qLWR5-3	S5_28487739	12.21	5	28499327	28500571	-	Os05g0572000	Pathogenesis-related transcriptional factor and ERF domain containing protein. (Os05t0572000-00)
qLWR7-1	S7_217125	-100.532	7	115444	117742	-	Os07g0102000	Tetraacyldisaccharide 4'-kinase domain containing protein. (Os07t0102000-01)
qLWR7-1	S7_217125	-92.0305	7	122255	127934	+	Os07g0102100	Similar to Potassium transporter 22. (Os07t0102100-01);Similar to Potassium transporter 1 (OsHAK1). Splice isoform 2. (Os07t0102100-02)
qLWR7-1	S7_217125	-90.2385	7	126296	127477	-	Os07g0102150	Hypothetical protein. (Os07t0102150-00)
qLWR7-1	S7_217125	-87.083	7	128713	131371	-	Os07g0102200	Conserved hypothetical protein. (Os07t0102200-01)
qLWR7-1	S7_217125	-78.2495	7	134173	143578	-	Os07g0102300	Glycophosphatidylinositol (GPI)-anchored membrane protein, Regulation of leaf rolling, Maintenance of cell wall formation, epidermal integrity and water homeostasis (Os07t0102300-01)
qLWR7-1	S7_217125	-68.459	7	147148	150184	-	Os07g0102400	Protein of unknown function DUF1084 family protein. (Os07t0102400-01)
qLWR7-1	S7_217125	-60.3715	7	154906	158601	-	Os07g0102500	Lupus La protein family protein. (Os07t0102500-01)
qLWR7-1	S7_217125	-34.246	7	182515	183243	-	Os07g0103000	Similar to GRF zinc finger family protein, expressed. (Os07t0103000-01)
qLWR7-1	S7_217125	-23.384	7	191053	196429	+	Os07g0103100	Similar to Glutamate receptor 3.4 precursor (Ligand-gated ion channel 3.4) (AtGLR4). Splice isoform 2. (Os07t0103100-01)
qLWR7-1	S7_217125	-18.9665	7	196515	199802	-	Os07g0103200	Similar to DDRGK domain-containing protein 1. (Os07t0103200-01)
qLWR7-1	S7_217125	0	7	213778	219543	+	Os07g0103500	2OG-Fe(II) oxygenase domain containing protein. (Os07t0103500-01)
qLWR7-1	S7_217125	1.589	7	218176	219252	-	Os07g0103600	Armadillo-like helical domain containing protein. (Os07t0103600-01)
qLWR7-1	S7_217125	19.8365	7	236594	237329	+	Os07g0104100	Similar to Class III peroxidase 97. (Os07t0104100-01)
qLWR7-1	S7_217125	23.5805	7	240466	240945	+	Os07g0104233	Similar to peroxidase 1. (Os07t0104233-00)
qLWR7-1	S7_217125	36.114	7	252925	253553	-	Os07g0104366	Hypothetical protein. (Os07t0104366-00)
qLWR7-1	S7_217125	44.102	7	259712	262742	+	Os07g0104500	Haem peroxidase, plant/fungal/bacterial family protein. (Os07t0104500-01)
qLWR7-1	S7_217125	50.151	7	264528	270024	-	Os07g0104750	Similar to H0502G05.13 protein. (Os07t0104750-00)
qLWR7-1	S7_217125	74.3105	7	291076	291795	+	Os07g0105000	Cupredoxin domain containing protein. (Os07t0105000-00)
qLWR7-1	S7_217125	76.475	7	292708	294492	-	Os07g0105100	Similar to DNA-directed RNA polymerases I, II, and III 7.3 kDa polypeptide. (Os07t0105100-00)
qLWR7-1	S7_217125	83.4395	7	299704	301425	+	Os07g0105200	Conserved hypothetical protein. (Os07t0105200-01)
qLWR7-1	S7_217125	85.8185	7	302259	303628	-	Os07g0105300	Conserved hypothetical protein. (Os07t0105300-01);Conserved hypothetical protein. (Os07t0105300-02)
qLWR7-1	S7_217125	89.386	7	306054	306968	+	Os07g0105600	Photosystem II oxygen evolving complex protein PsbQ family protein. (Os07t0105600-01)
qLWR7-1	S7_217125	92.3655	7	307038	311943	-	Os07g0105700	Class-XIV kinesin (Os07t0105700-01)
qLWR7-1	S7_217125	92.587	7	307382	312042	+	Os07g0105750	Non-protein coding transcript. (Os07t0105750-00)
qLWR7-2	S7_22113010	-4.1005	7	22107689	22110130	+	Os07g0555000	F-box domain, Skp2-like domain containing protein.
qLWR7-2	S7_22113010	-4.798	7	22107715	22108709	-	Os07g0555050	Hypothetical protein. (Os07t0555050-00)
qLWR7-2	S7_22113010	0	7	22110826	22113674	+	Os07g0555100	Conserved hypothetical protein. (Os07t0555100-01)
qLWR7-2	S7_22113010	6.035	7	22114961	22123129	+	Os07g0555200	Translation initiation factor 4G, Resistance to Rice tungro spherical virus (Os07t0555200-01); Similar to predicted protein. (Os07t0555200-03);Transcript variants=Os07t0555200-01,Os07t0555200-03;
qLWR7-2	S7_22113010	14.5205	7	22125123	22129938	-	Os07g0555250	Non-protein coding transcript. (Os07t0555250-00)
qLWR7-2	S7_22113010	13.5605	7	22125218	22127923	+	Os07g0555300	Conserved hypothetical protein. (Os07t0555300-01);Conserved hypothetical protein. (Os07t0555300-02)
qLWR7-2	S7_22113010	16.44	7	22128502	22130398	+	Os07g0555400	Conserved hypothetical protein. (Os07t0555400-01)
qLWR7-2	S7_22113010	28.4815	7	22141246	22141737	+	Os07g0555850	Non-protein coding transcript. (Os07t0555850-00)
qLWR7-3	S7_25214651	0	7	25214544	25216620	-	Os07g0612400	Alpha/beta hydrolase family protein. (Os07t0612400-01)
qLWR7-3	S7_25214651	6.63	7	25219509	25223053	-	Os07g0612500	Transcription factor TAFII-31 domain containing protein. (Os07t0612500-00)
qLWR7-3	S7_25214651	11.658	7	25225862	25226756	-	Os07g0613000	RelA/SpoT protein domain containing protein. (Os07t0613000-01)
qLWR7-3	S7_25214651	22.432	7	25236713	25237453	-	Os07g0613200	Similar to 60S ribosomal protein L27a-3. (Os07t0613200-00)
qPC2-1	S2_9655892	-13.853	2	9641620	9642458	+	Os02g0269200	Dynein light chain, type 1 family protein. (Os02t0269200-01)
qPC2-1	S2_9655892	0	2	9650745	9656251	+	Os02g0269400	Hypothetical protein. (Os02t0269400-00)
qPC2-1	S2_9655892	0	2	9650760	9656236	-	Os02g0269600	Similar to Subtilase. (Os02t0269600-00)
qPC4-1	S4_20157178	1.529	4	20158243	20159171	-	Os04g0406300	Similar to Integral membrane protein. (Os04t0406300-01);Hypothetical protein. (Os04t0406300-02)
qPC4-2	S4_28610659	-6.7905	4	28600699	28607038	-	Os04g0569100	Similar to OCL1 homeobox protein. (Os04t0569100-01);Homeodomain-leucine zipper IV protein, GL2-type homeobox protein, Transcription factor, Promotion of flowering time preferentially under long days, Positive regulation of cuticular wax biosynthesis, Drought stress response (Os04t0569100-02)
qPC7-1	S7_6068017	-93.6565	7	5972103	5976618	+	Os07g0210000	Hypothetical conserved gene. (Os07t0210000-01);Exo70 exocyst complex subunit domain containing protein. (Os07t0210000-02)
qPC7-1	S7_6068017	-90.042	7	5976882	5979068	-	Os07g0210100	Exo70 exocyst complex subunit domain containing protein. (Os07t0210100-01)
qPC7-1	S7_6068017	-66.697	7	6000383	6002257	-	Os07g0210800	Hypothetical conserved gene. (Os07t0210800-00)
qPC7-1	S7_6068017	-48.8495	7	6017683	6020652	-	Os07g0211000	Hypothetical conserved gene. (Os07t0211000-00)
qPC7-1	S7_6068017	-31.436	7	6035953	6037209	+	Os07g0211101	Hypothetical conserved gene. (Os07t0211101-00)
qPC7-1	S7_6068017	-24.3755	7	6042977	6044306	+	Os07g0211200	Similar to REF4 (REDUCED EPIDERMAL FLUORESCENCE 4). (Os07t0211200-01)
qPC7-1	S7_6068017	-11.6905	7	6052570	6060083	+	Os07g0211400	Similar to Kinase associated protein phosphatase. (Os07t0211400-01)
qPC7-1	S7_6068017	0	7	6062889	6069317	+	Os07g0211500	Basic helix-loop-helix (bHLH) protein, Proanthocyanidin synthesis, Regulation of proanthocyanidin pigmentation, (Nipponbare: loss-of-function mutation of Rc) (Os07t0211500-01)
qPC7-1	S7_6068017	22.939	7	6088484	6093428	-	Os07g0211601	Hypothetical gene. (Os07t0211601-01)
qPC7-1	S7_6068017	22.4965	7	6089992	6091035	+	Os07g0211700	Similar to isopentenyl transferase IPT4. (Os07t0211700-00)
qPC7-1	S7_6068017	43.753	7	6108059	6115481	-	Os07g0211800	Protein of unknown function DUF1749 family protein. (Os07t0211800-01);Similar to predicted protein. (Os07t0211800-02)
qPC7-1	S7_6068017	51.814	7	6117890	6121772	-	Os07g0211900	Protein of unknown function DUF632 domain containing protein. (Os07t0211900-01)
qPC7-1	S7_6068017	67.361	7	6134016	6136740	+	Os07g0212200	Similar to MRNA-binding protein (Fragment). (Os07t0212200-01)
qPC7-1	S7_6068017	71.0225	7	6137057	6141022	-	Os07g0212300	Similar to Nudix hydrolase 16, mitochondrial precursor (EC 3.6.1.-) (AtNUDT16). (Os07t0212300-01)
qPC7-1	S7_6068017	81.7425	7	6146970	6152549	-	Os07g0212400	Transposase, Ptta/En/Spm, plant domain containing protein. (Os07t0212400-01)
qPC7-2	S7_7239363	-39.114	7	7198586	7201912	-	Os07g0229100	Cyclin-like F-box domain containing protein. (Os07t0229100-01)
qPC7-2	S7_7239363	-31.2795	7	7206630	7209537	-	Os07g0229200	Cyclin-like F-box domain containing protein. (Os07t0229200-01)
qPC7-2	S7_7239363	-12.945	7	7224593	7228243	-	Os07g0229700	Similar to DNA-directed RNA polymerase I subunit 12 (EC 2.7.7.6) (Nuclear RNA polymerase I small specific subunit Rpa12) (Zinc ribbon domain containing protein 1). (Os07t0229700-01)
qPC7-2	S7_7239363	-8.631	7	7229170	7232294	-	Os07g0229800	Similar to GLY1; glycerol-3-phosphate dehydrogenase (NAD+). (Os07t0229800-01)
qPC7-2	S7_7239363	-5.1855	7	7233158	7235197	-	Os07g0229900	Ribosomal protein S12e domain containing protein. (Os07t0229900-01);Similar to 40S ribosomal protein S12. (Os07t0229900-02)
qPC7-3	S7_10922526	2.012	7	10924115	10924961	+	Os07g0284700	Conserved hypothetical protein. (Os07t0284700-00)
