# Supplementary material for: Genetic Diversity Relationship Between Grain Quality and Appearance in Rice
Source: Front Plant Sci. 2021 Aug 2;12:708996. doi: 10.3389/fpls.2021.708996 (PMC8365354; doi:10.3389/fpls.2021.708996)
Supplement: Supplementary Table 5 — Annotation of all missense SNPs located in candidate genes using SnpEff software. [file Table_5.XLSX]

## Sheet: Table S5
Table S5 Annotation of all missense SNPs located in candidate genes using SnpEff software.
Chromosome	Position	Ref	Alt	Annotation
1	3243842	T	C	ANN=C|missense_variant|MODERATE|Os01g0162001|Os01g0162001|transcript|Os01t0162001-00|protein_coding|2/2|c.247A>G|p.Asn83Asp|564/732|247/306|83/101||,C|downstream_gene_variant|MODIFIER|Os01g0162101|Os01g0162101|transcript|Os01t0162101-00|protein_coding||c.*1287A>G|||||1103|WARNING_TRANSCRIPT_NO_START_CODON
1	3244070	G	C	ANN=C|missense_variant|MODERATE|Os01g0162001|Os01g0162001|transcript|Os01t0162001-00|protein_coding|2/2|c.19C>G|p.Gln7Glu|336/732|19/306|7/101||,C|downstream_gene_variant|MODIFIER|Os01g0162101|Os01g0162101|transcript|Os01t0162101-00|protein_coding||c.*1059C>G|||||875|WARNING_TRANSCRIPT_NO_START_CODON
1	3251463	A	G	ANN=G|missense_variant|MODERATE|Os01g0162200|Os01g0162200|transcript|Os01t0162200-00|protein_coding|1/1|c.38A>G|p.Glu13Gly|38/1299|38/1299|13/432||
1	3251538	C	A	ANN=A|missense_variant|MODERATE|Os01g0162200|Os01g0162200|transcript|Os01t0162200-00|protein_coding|1/1|c.113C>A|p.Ser38Tyr|113/1299|113/1299|38/432||
1	3251646	G	A	ANN=A|missense_variant|MODERATE|Os01g0162200|Os01g0162200|transcript|Os01t0162200-00|protein_coding|1/1|c.221G>A|p.Gly74Glu|221/1299|221/1299|74/432||
1	3251648	C	G	ANN=G|missense_variant|MODERATE|Os01g0162200|Os01g0162200|transcript|Os01t0162200-00|protein_coding|1/1|c.223C>G|p.Leu75Val|223/1299|223/1299|75/432||
1	3251727	C	T	ANN=T|missense_variant|MODERATE|Os01g0162200|Os01g0162200|transcript|Os01t0162200-00|protein_coding|1/1|c.302C>T|p.Thr101Ile|302/1299|302/1299|101/432||
1	3251802	T	C	ANN=C|missense_variant|MODERATE|Os01g0162200|Os01g0162200|transcript|Os01t0162200-00|protein_coding|1/1|c.377T>C|p.Val126Ala|377/1299|377/1299|126/432||
1	3252132	G	C	ANN=C|missense_variant|MODERATE|Os01g0162200|Os01g0162200|transcript|Os01t0162200-00|protein_coding|1/1|c.707G>C|p.Gly236Ala|707/1299|707/1299|236/432||,C|upstream_gene_variant|MODIFIER|Os01g0162300|Os01g0162300|transcript|Os01t0162300-01|protein_coding||c.-4690G>C|||||4690|WARNING_TRANSCRIPT_NO_START_CODON
1	3252222	C	T	ANN=T|missense_variant|MODERATE|Os01g0162200|Os01g0162200|transcript|Os01t0162200-00|protein_coding|1/1|c.797C>T|p.Thr266Ile|797/1299|797/1299|266/432||,T|upstream_gene_variant|MODIFIER|Os01g0162300|Os01g0162300|transcript|Os01t0162300-01|protein_coding||c.-4600C>T|||||4600|WARNING_TRANSCRIPT_NO_START_CODON
1	3252240	C	G	ANN=G|missense_variant|MODERATE|Os01g0162200|Os01g0162200|transcript|Os01t0162200-00|protein_coding|1/1|c.815C>G|p.Ser272Cys|815/1299|815/1299|272/432||,G|upstream_gene_variant|MODIFIER|Os01g0162300|Os01g0162300|transcript|Os01t0162300-01|protein_coding||c.-4582C>G|||||4582|WARNING_TRANSCRIPT_NO_START_CODON
1	3252249	A	G	ANN=G|missense_variant|MODERATE|Os01g0162200|Os01g0162200|transcript|Os01t0162200-00|protein_coding|1/1|c.824A>G|p.Asp275Gly|824/1299|824/1299|275/432||,G|upstream_gene_variant|MODIFIER|Os01g0162300|Os01g0162300|transcript|Os01t0162300-01|protein_coding||c.-4573A>G|||||4573|WARNING_TRANSCRIPT_NO_START_CODON
1	3252390	C	T	ANN=T|missense_variant|MODERATE|Os01g0162200|Os01g0162200|transcript|Os01t0162200-00|protein_coding|1/1|c.965C>T|p.Ser322Phe|965/1299|965/1299|322/432||,T|upstream_gene_variant|MODIFIER|Os01g0162300|Os01g0162300|transcript|Os01t0162300-01|protein_coding||c.-4432C>T|||||4432|WARNING_TRANSCRIPT_NO_START_CODON
1	3252431	T	C	ANN=C|missense_variant|MODERATE|Os01g0162200|Os01g0162200|transcript|Os01t0162200-00|protein_coding|1/1|c.1006T>C|p.Trp336Arg|1006/1299|1006/1299|336/432||,C|upstream_gene_variant|MODIFIER|Os01g0162300|Os01g0162300|transcript|Os01t0162300-01|protein_coding||c.-4391T>C|||||4391|WARNING_TRANSCRIPT_NO_START_CODON
1	3252639	A	G	ANN=G|missense_variant|MODERATE|Os01g0162200|Os01g0162200|transcript|Os01t0162200-00|protein_coding|1/1|c.1214A>G|p.Glu405Gly|1214/1299|1214/1299|405/432||,G|upstream_gene_variant|MODIFIER|Os01g0162300|Os01g0162300|transcript|Os01t0162300-01|protein_coding||c.-4183A>G|||||4183|WARNING_TRANSCRIPT_NO_START_CODON
1	3257338	C	T	ANN=T|missense_variant|MODERATE|Os01g0162300|Os01g0162300|transcript|Os01t0162300-01|protein_coding|1/1|c.517C>T|p.Arg173Cys|517/1080|517/975|173/324||WARNING_TRANSCRIPT_NO_START_CODON,T|upstream_gene_variant|MODIFIER|Os01g0162400|Os01g0162400|transcript|Os01t0162400-01|protein_coding||c.-607C>T|||||606|WARNING_TRANSCRIPT_NO_START_CODON,T|upstream_gene_variant|MODIFIER|Os01g0162500|Os01g0162500|t…
1	3257576	T	C	ANN=C|missense_variant|MODERATE|Os01g0162300|Os01g0162300|transcript|Os01t0162300-01|protein_coding|1/1|c.755T>C|p.Val252Ala|755/1080|755/975|252/324||WARNING_TRANSCRIPT_NO_START_CODON,C|upstream_gene_variant|MODIFIER|Os01g0162400|Os01g0162400|transcript|Os01t0162400-01|protein_coding||c.-369T>C|||||368|WARNING_TRANSCRIPT_NO_START_CODON,C|upstream_gene_variant|MODIFIER|Os01g0162500|Os01g0162500|t…
1	3257639	C	A	ANN=A|missense_variant|MODERATE|Os01g0162300|Os01g0162300|transcript|Os01t0162300-01|protein_coding|1/1|c.818C>A|p.Ala273Glu|818/1080|818/975|273/324||WARNING_TRANSCRIPT_NO_START_CODON,A|upstream_gene_variant|MODIFIER|Os01g0162400|Os01g0162400|transcript|Os01t0162400-01|protein_coding||c.-306C>A|||||305|WARNING_TRANSCRIPT_NO_START_CODON,A|upstream_gene_variant|MODIFIER|Os01g0162500|Os01g0162500|t…
1	3260075	A	G	ANN=G|missense_variant|MODERATE|Os01g0162500|Os01g0162500|transcript|Os01t0162500-01|protein_coding|1/1|c.560A>G|p.Asp187Gly|560/3146|560/732|187/243||WARNING_TRANSCRIPT_NO_START_CODON,G|downstream_gene_variant|MODIFIER|Os01g0162300|Os01g0162300|transcript|Os01t0162300-01|protein_coding||c.*2279A>G|||||2174|WARNING_TRANSCRIPT_NO_START_CODON,G|downstream_gene_variant|MODIFIER|Os01g0162400|Os01g016…
1	3276313	A	G	ANN=G|missense_variant|MODERATE|Os01g0162800|Os01g0162800|transcript|Os01t0162800-00|protein_coding|3/3|c.3037A>G|p.Met1013Val|3037/3099|3037/3099|1013/1032||,G|upstream_gene_variant|MODIFIER|Os01g0162701|Os01g0162701|transcript|Os01t0162701-01|protein_coding||c.-2959T>C|||||1927|
1	3283254	A	C	ANN=C|missense_variant|MODERATE|Os01g0162900|Os01g0162900|transcript|Os01t0162900-01|protein_coding|2/2|c.426T>G|p.Ser142Arg|1652/1929|426/504|142/167||,C|upstream_gene_variant|MODIFIER|Os01g0163000|Os01g0163000|transcript|Os01t0163000-01|protein_coding||c.-13A>C|||||12|WARNING_TRANSCRIPT_NO_START_CODON
1	3283507	T	C	ANN=C|missense_variant|MODERATE|Os01g0162900|Os01g0162900|transcript|Os01t0162900-01|protein_coding|2/2|c.173A>G|p.Tyr58Cys|1399/1929|173/504|58/167||,C|missense_variant|MODERATE|Os01g0163000|Os01g0163000|transcript|Os01t0163000-01|protein_coding|1/1|c.241T>C|p.Tyr81His|242/3092|241/2919|81/972||WARNING_TRANSCRIPT_NO_START_CODON
1	3283538	C	G	ANN=G|missense_variant|MODERATE|Os01g0162900|Os01g0162900|transcript|Os01t0162900-01|protein_coding|2/2|c.142G>C|p.Ala48Pro|1368/1929|142/504|48/167||,G|missense_variant|MODERATE|Os01g0163000|Os01g0163000|transcript|Os01t0163000-01|protein_coding|1/1|c.272C>G|p.Ala91Gly|273/3092|272/2919|91/972||WARNING_TRANSCRIPT_NO_START_CODON
1	3284231	A	G	ANN=G|missense_variant|MODERATE|Os01g0163000|Os01g0163000|transcript|Os01t0163000-01|protein_coding|1/1|c.965A>G|p.Asp322Gly|966/3092|965/2919|322/972||WARNING_TRANSCRIPT_NO_START_CODON,G|5_prime_UTR_variant|MODIFIER|Os01g0162900|Os01g0162900|transcript|Os01t0162900-01|protein_coding|2/2|c.-552T>C|||||552|
1	3284285	C	T	ANN=T|missense_variant|MODERATE|Os01g0163000|Os01g0163000|transcript|Os01t0163000-01|protein_coding|1/1|c.1019C>T|p.Ser340Phe|1020/3092|1019/2919|340/972||WARNING_TRANSCRIPT_NO_START_CODON,T|5_prime_UTR_variant|MODIFIER|Os01g0162900|Os01g0162900|transcript|Os01t0162900-01|protein_coding|2/2|c.-606G>A|||||606|
1	3284309	A	G	ANN=G|missense_variant|MODERATE|Os01g0163000|Os01g0163000|transcript|Os01t0163000-01|protein_coding|1/1|c.1043A>G|p.Asn348Ser|1044/3092|1043/2919|348/972||WARNING_TRANSCRIPT_NO_START_CODON,G|5_prime_UTR_variant|MODIFIER|Os01g0162900|Os01g0162900|transcript|Os01t0162900-01|protein_coding|2/2|c.-630T>C|||||630|
1	3284561	C	T	ANN=T|missense_variant|MODERATE|Os01g0163000|Os01g0163000|transcript|Os01t0163000-01|protein_coding|1/1|c.1295C>T|p.Thr432Ile|1296/3092|1295/2919|432/972||WARNING_TRANSCRIPT_NO_START_CODON,T|5_prime_UTR_variant|MODIFIER|Os01g0162900|Os01g0162900|transcript|Os01t0162900-01|protein_coding|2/2|c.-882G>A|||||882|
1	3284681	A	C	ANN=C|missense_variant|MODERATE|Os01g0163000|Os01g0163000|transcript|Os01t0163000-01|protein_coding|1/1|c.1415A>C|p.Lys472Thr|1416/3092|1415/2919|472/972||WARNING_TRANSCRIPT_NO_START_CODON,C|5_prime_UTR_premature_start_codon_gain_variant|LOW|Os01g0162900|Os01g0162900|transcript|Os01t0162900-01|protein_coding|2/2|c.-1002T>G||||||,C|5_prime_UTR_variant|MODIFIER|Os01g0162900|Os01g0162900|transcript|…
1	3284711	C	T	ANN=T|missense_variant|MODERATE|Os01g0163000|Os01g0163000|transcript|Os01t0163000-01|protein_coding|1/1|c.1445C>T|p.Ser482Leu|1446/3092|1445/2919|482/972||WARNING_TRANSCRIPT_NO_START_CODON,T|intron_variant|MODIFIER|Os01g0162900|Os01g0162900|transcript|Os01t0162900-01|protein_coding|1/1|c.-1020-12G>A||||||
1	3285242	G	C	ANN=C|missense_variant|MODERATE|Os01g0163000|Os01g0163000|transcript|Os01t0163000-01|protein_coding|1/1|c.1976G>C|p.Cys659Ser|1977/3092|1976/2919|659/972||WARNING_TRANSCRIPT_NO_START_CODON,C|upstream_gene_variant|MODIFIER|Os01g0162900|Os01g0162900|transcript|Os01t0162900-01|protein_coding||c.-1471C>G|||||245|
1	3285338	C	G	ANN=G|missense_variant|MODERATE|Os01g0163000|Os01g0163000|transcript|Os01t0163000-01|protein_coding|1/1|c.2072C>G|p.Ala691Gly|2073/3092|2072/2919|691/972||WARNING_TRANSCRIPT_NO_START_CODON,G|upstream_gene_variant|MODIFIER|Os01g0162900|Os01g0162900|transcript|Os01t0162900-01|protein_coding||c.-1567G>C|||||341|
1	3285569	T	G	ANN=G|missense_variant|MODERATE|Os01g0163000|Os01g0163000|transcript|Os01t0163000-01|protein_coding|1/1|c.2303T>G|p.Ile768Ser|2304/3092|2303/2919|768/972||WARNING_TRANSCRIPT_NO_START_CODON,G|upstream_gene_variant|MODIFIER|Os01g0162900|Os01g0162900|transcript|Os01t0162900-01|protein_coding||c.-1798A>C|||||572|
1	3285950	G	T	ANN=T|missense_variant|MODERATE|Os01g0163000|Os01g0163000|transcript|Os01t0163000-01|protein_coding|1/1|c.2684G>T|p.Arg895Ile|2685/3092|2684/2919|895/972||WARNING_TRANSCRIPT_NO_START_CODON,T|upstream_gene_variant|MODIFIER|Os01g0162900|Os01g0162900|transcript|Os01t0162900-01|protein_coding||c.-2179C>A|||||953|
1	3285982	C	T	ANN=T|missense_variant|MODERATE|Os01g0163000|Os01g0163000|transcript|Os01t0163000-01|protein_coding|1/1|c.2716C>T|p.Pro906Ser|2717/3092|2716/2919|906/972||WARNING_TRANSCRIPT_NO_START_CODON,T|upstream_gene_variant|MODIFIER|Os01g0162900|Os01g0162900|transcript|Os01t0162900-01|protein_coding||c.-2211G>A|||||985|
1	3294081	A	G	ANN=G|missense_variant|MODERATE|Os01g0163616|Os01g0163616|transcript|Os01t0163616-00|protein_coding|1/1|c.25T>C|p.Phe9Leu|25/254|25/150|9/49||WARNING_TRANSCRIPT_NO_START_CODON,G|downstream_gene_variant|MODIFIER|Os01g0163450|Os01g0163450|transcript|Os01t0163450-01|protein_coding||c.*2627A>G|||||587|WARNING_TRANSCRIPT_NO_START_CODON
1	3313202	A	G	ANN=G|missense_variant|MODERATE|Os01g0164075|Os01g0164075|transcript|Os01t0164075-00|protein_coding|1/1|c.5T>C|p.Val2Ala|5/537|5/537|2/178||
1	3329456	A	G	ANN=G|missense_variant|MODERATE|BIP115|Os01g0164500|transcript|Os01t0164500-01|protein_coding|9/10|c.1508T>C|p.Val503Ala|1549/2140|1508/1944|503/647||,G|downstream_gene_variant|MODIFIER|Os01g0164400|Os01g0164400|transcript|Os01t0164400-01|protein_coding||c.*2522A>G|||||2334|,G|downstream_gene_variant|MODIFIER|OsPP2C01|Os01g0164600|transcript|Os01t0164600-01|protein_coding||c.*3782T>C|||||3496|
1	3330485	A	G	ANN=G|missense_variant|MODERATE|BIP115|Os01g0164500|transcript|Os01t0164500-01|protein_coding|5/10|c.937T>C|p.Ser313Pro|978/2140|937/1944|313/647||,G|upstream_gene_variant|MODIFIER|Os01g0164650|Os01g0164650|transcript|Os01t0164650-00|pseudogene||n.-4385A>G|||||4385|,G|downstream_gene_variant|MODIFIER|Os01g0164400|Os01g0164400|transcript|Os01t0164400-01|protein_coding||c.*3551A>G|||||3363|,G|downs…
1	3353365	C	T	ANN=T|missense_variant|MODERATE|OsBRCA2|Os01g0164900|transcript|Os01t0164900-01|protein_coding|6/12|c.649G>A|p.Val217Ile|732/1528|649/1445|217/480||WARNING_TRANSCRIPT_INCOMPLETE,T|upstream_gene_variant|MODIFIER|DREB2A|Os01g0165000|transcript|Os01t0165000-01|protein_coding||c.-3417C>T|||||3018|,T|upstream_gene_variant|MODIFIER|DREB2A|Os01g0165000|transcript|Os01t0165000-02|protein_coding||c.-3417C…
1	3354477	C	G	ANN=G|missense_variant|MODERATE|OsBRCA2|Os01g0164900|transcript|Os01t0164900-01|protein_coding|3/12|c.262G>C|p.Gly88Arg|345/1528|262/1445|88/480||WARNING_TRANSCRIPT_INCOMPLETE,G|upstream_gene_variant|MODIFIER|DREB2A|Os01g0165000|transcript|Os01t0165000-01|protein_coding||c.-2305C>G|||||1906|,G|upstream_gene_variant|MODIFIER|DREB2A|Os01g0165000|transcript|Os01t0165000-02|protein_coding||c.-2305C>G…
1	3364843	C	A	ANN=A|missense_variant|MODERATE|Os01g0165200|Os01g0165200|transcript|Os01t0165200-01|protein_coding|5/11|c.1098G>T|p.Lys366Asn|1257/2660|1098/2103|366/700||,A|missense_variant|MODERATE|Os01g0165200|Os01g0165200|transcript|Os01t0165200-02|protein_coding|1/7|c.51G>T|p.Lys17Asn|100/1454|51/513|17/170||,A|upstream_gene_variant|MODIFIER|Os01g0165100|Os01g0165100|transcript|Os01t0165100-02|protein_codi…
2	9651518	T	C	ANN=C|missense_variant|MODERATE|OsSub13|Os02g0269600|transcript|Os02t0269600-00|protein_coding|7/8|c.1330A>G|p.Lys444Glu|1330/1995|1330/1995|444/664||,C|5_prime_UTR_variant|MODIFIER|Os02g0269400|Os02g0269400|transcript|Os02t0269400-00|protein_coding|2/7|c.-562T>C|||||2454|
2	9656187	G	A	ANN=A|missense_variant|MODERATE|OsSub13|Os02g0269600|transcript|Os02t0269600-00|protein_coding|1/8|c.50C>T|p.Ala17Val|50/1995|50/1995|17/664||,A|3_prime_UTR_variant|MODIFIER|Os02g0269400|Os02g0269400|transcript|Os02t0269400-00|protein_coding|7/7|c.*174G>A|||||174|,A|upstream_gene_variant|MODIFIER|Os02g0269650|Os02g0269650|transcript|Os02t0269650-01|protein_coding||c.-4050G>A|||||4050|WARNING_TRAN…
2	9660672	C	G	ANN=G|missense_variant|MODERATE|Os02g0269650|Os02g0269650|transcript|Os02t0269650-01|protein_coding|1/1|c.436C>G|p.Pro146Ala|436/524|436/453|146/150||WARNING_TRANSCRIPT_NO_START_CODON,G|upstream_gene_variant|MODIFIER|OsSub13|Os02g0269600|transcript|Os02t0269600-00|protein_coding||c.-4436G>C|||||4436|,G|downstream_gene_variant|MODIFIER|Os02g0269400|Os02g0269400|transcript|Os02t0269400-00|protein_c…
3	5136200	C	T	ANN=T|missense_variant|MODERATE|Os03g0197850|Os03g0197850|transcript|Os03t0197850-00|protein_coding|1/1|c.202G>A|p.Gly68Ser|1167/1408|202/276|68/91||,T|synonymous_variant|LOW|OsIDD1|Os03g0197800|transcript|Os03t0197800-00|protein_coding|4/4|c.780C>T|p.Ala260Ala|945/2186|780/1659|260/552||,T|upstream_gene_variant|MODIFIER|Os03g0197825|Os03g0197825|transcript|Os03t0197825-00|protein_coding||c.-1094…
3	5136266	T	C	ANN=C|missense_variant|MODERATE|Os03g0197850|Os03g0197850|transcript|Os03t0197850-00|protein_coding|1/1|c.136A>G|p.Arg46Gly|1101/1408|136/276|46/91||,C|synonymous_variant|LOW|OsIDD1|Os03g0197800|transcript|Os03t0197800-00|protein_coding|4/4|c.846T>C|p.Pro282Pro|1011/2186|846/1659|282/552||,C|upstream_gene_variant|MODIFIER|Os03g0197825|Os03g0197825|transcript|Os03t0197825-00|protein_coding||c.-116…
3	5159893	T	C	ANN=C|missense_variant|MODERATE|Os03g0198200|Os03g0198200|transcript|Os03t0198200-01|protein_coding|1/1|c.149A>G|p.Tyr50Cys|370/626|149/270|50/89||,C|upstream_gene_variant|MODIFIER|OsDjC25|Os03g0198300|transcript|Os03t0198300-01|protein_coding||c.-1843T>C|||||1749|,C|upstream_gene_variant|MODIFIER|OsDjC25|Os03g0198300|transcript|Os03t0198300-02|protein_coding||c.-1843T>C|||||1776|
3	5205642	T	C	ANN=C|missense_variant|MODERATE|TagI|Os03g0198900|transcript|Os03t0198900-01|protein_coding|2/10|c.403A>G|p.Met135Val|418/1864|403/1284|135/427||,C|upstream_gene_variant|MODIFIER|Os03g0199000|Os03g0199000|transcript|Os03t0199000-01|protein_coding||c.-948T>C|||||623|,C|upstream_gene_variant|MODIFIER|TagI|Os03g0198900|transcript|Os03t0198900-02|protein_coding||c.-3085A>G|||||2790|,C|downstream_gene…
3	5209413	A	T	ANN=T|missense_variant&splice_region_variant|MODERATE|Os03g0199000|Os03g0199000|transcript|Os03t0199000-01|protein_coding|6/10|c.835A>T|p.Arg279Trp|1160/2030|835/930|279/309||,T|upstream_gene_variant|MODIFIER|TagI|Os03g0198900|transcript|Os03t0198900-01|protein_coding||c.-3000T>A|||||2985|,T|upstream_gene_variant|MODIFIER|Os03g0199100|Os03g0199100|transcript|Os03t0199100-01|protein_coding||c.-543…
3	5218852	T	C	ANN=C|start_lost|HIGH|Os03g0199300|Os03g0199300|transcript|Os03t0199300-01|protein_coding|1/1|c.2T>C|p.Met1?|244/1111|2/726|1/241||,C|5_prime_UTR_variant|MODIFIER|Os03g0199200|Os03g0199200|transcript|Os03t0199200-01|protein_coding|1/1|c.-50A>G|||||50|WARNING_TRANSCRIPT_NO_START_CODON,C|downstream_gene_variant|MODIFIER|Os03g0199100|Os03g0199100|transcript|Os03t0199100-01|protein_coding||c.*1421T>C…
3	5279699	T	A	ANN=A|missense_variant|MODERATE|Os03g0200600|Os03g0200600|transcript|Os03t0200600-00|protein_coding|3/5|c.679A>T|p.Asn227Tyr|713/2230|679/2175|227/724||,A|downstream_gene_variant|MODIFIER|cyc07|Os03g0200500|transcript|Os03t0200500-01|protein_coding||c.*2735T>A|||||2563|,A|downstream_gene_variant|MODIFIER|Os03g0200700|Os03g0200700|transcript|Os03t0200700-01|protein_coding||c.*4155A>T|||||3760|,A|d…
3	5295572	C	A	ANN=A|missense_variant&splice_region_variant|MODERATE|Os03g0201000|Os03g0201000|transcript|Os03t0201000-01|protein_coding|2/4|c.266C>A|p.Ala89Asp|345/1311|266/984|89/327||,A|downstream_gene_variant|MODIFIER|OsCYP65|Os03g0201100|transcript|Os03t0201100-01|protein_coding||c.*3580G>T|||||1764|
3	5306001	A	G	ANN=G|missense_variant|MODERATE|Os03g0201400|Os03g0201400|transcript|Os03t0201400-01|protein_coding|1/1|c.1027A>G|p.Ser343Gly|1060/2671|1027/2391|343/796||,G|missense_variant|MODERATE|Os03g0201400|Os03g0201400|transcript|Os03t0201400-02|protein_coding|1/9|c.1027A>G|p.Ser343Gly|1055/6852|1027/2391|343/796||,G|upstream_gene_variant|MODIFIER|OsCYP65|Os03g0201100|transcript|Os03t0201100-01|protein_co…
3	5311124	G	A	ANN=A|splice_donor_variant&intron_variant|HIGH|Os03g0201400|Os03g0201400|transcript|Os03t0201400-02|protein_coding|5/8|c.*2505+1G>A||||||,A|downstream_gene_variant|MODIFIER|Os03g0201400|Os03g0201400|transcript|Os03t0201400-01|protein_coding||c.*3759G>A|||||3512|;LOF=(Os03g0201400|Os03g0201400|2|0.50)
3	8211220	C	T	ANN=T|missense_variant|MODERATE|Os03g0255200|Os03g0255200|transcript|Os03t0255200-01|protein_coding|2/5|c.44G>A|p.Arg15Gln|247/1351|44/849|15/282||,T|missense_variant|MODERATE|Os03g0255200|Os03g0255200|transcript|Os03t0255200-02|protein_coding|2/5|c.44G>A|p.Arg15Gln|191/1426|44/849|15/282||,T|upstream_gene_variant|MODIFIER|Os03g0255400|Os03g0255400|transcript|Os03t0255400-01|protein_coding||c.-17…
3	8215136	T	C	ANN=C|missense_variant|MODERATE|Os03g0255400|Os03g0255400|transcript|Os03t0255400-01|protein_coding|2/5|c.1037T>C|p.Leu346Pro|1526/2797|1037/2097|346/698||,C|upstream_gene_variant|MODIFIER|Os03g0255200|Os03g0255200|transcript|Os03t0255200-01|protein_coding||c.-3426A>G|||||3223|,C|upstream_gene_variant|MODIFIER|Os03g0255200|Os03g0255200|transcript|Os03t0255200-02|protein_coding||c.-3426A>G|||||327…
3	8215614	G	A	ANN=A|missense_variant|MODERATE|Os03g0255400|Os03g0255400|transcript|Os03t0255400-01|protein_coding|3/5|c.1402G>A|p.Val468Ile|1891/2797|1402/2097|468/698||,A|upstream_gene_variant|MODIFIER|Os03g0255200|Os03g0255200|transcript|Os03t0255200-01|protein_coding||c.-3904C>T|||||3701|,A|upstream_gene_variant|MODIFIER|Os03g0255200|Os03g0255200|transcript|Os03t0255200-02|protein_coding||c.-3904C>T|||||375…
3	8217291	C	A	ANN=A|missense_variant|MODERATE|Os03g0255400|Os03g0255400|transcript|Os03t0255400-01|protein_coding|5/5|c.1941C>A|p.His647Gln|2430/2797|1941/2097|647/698||,A|downstream_gene_variant|MODIFIER|Os03g0255500|Os03g0255500|transcript|Os03t0255500-01|protein_coding||c.*1895G>T|||||1607|,A|downstream_gene_variant|MODIFIER|Os03g0255500|Os03g0255500|transcript|Os03t0255500-02|protein_coding||c.*1895G>T||||…
3	8220910	G	A	ANN=A|missense_variant|MODERATE|Os03g0255500|Os03g0255500|transcript|Os03t0255500-01|protein_coding|7/13|c.1003C>T|p.Leu335Phe|1099/2376|1003/1992|335/663||,A|upstream_gene_variant|MODIFIER|Os03g0255500|Os03g0255500|transcript|Os03t0255500-02|protein_coding||c.-1127C>T|||||1125|,A|downstream_gene_variant|MODIFIER|Os03g0255400|Os03g0255400|transcript|Os03t0255400-01|protein_coding||c.*3463G>A|||||…
3	8220988	C	A	ANN=A|missense_variant|MODERATE|Os03g0255500|Os03g0255500|transcript|Os03t0255500-01|protein_coding|7/13|c.925G>T|p.Ala309Ser|1021/2376|925/1992|309/663||,A|upstream_gene_variant|MODIFIER|Os03g0255500|Os03g0255500|transcript|Os03t0255500-02|protein_coding||c.-1205G>T|||||1203|,A|downstream_gene_variant|MODIFIER|Os03g0255400|Os03g0255400|transcript|Os03t0255400-01|protein_coding||c.*3541C>A|||||33…
3	8298848	T	C	ANN=C|missense_variant|MODERATE|Os03g0256800|Os03g0256800|transcript|Os03t0256800-00|protein_coding|16/23|c.1346A>G|p.Asp449Gly|1728/2891|1346/1491|449/496||
3	13199530	C	T	ANN=T|missense_variant|MODERATE|OsRFP|Os03g0351800|transcript|Os03t0351800-01|protein_coding|2/2|c.728G>A|p.Arg243His|925/1229|728/852|243/283||
3	13200139	A	G	ANN=G|missense_variant|MODERATE|OsRFP|Os03g0351800|transcript|Os03t0351800-01|protein_coding|2/2|c.119T>C|p.Val40Ala|316/1229|119/852|40/283||
3	13223017	C	A	ANN=A|missense_variant|MODERATE|Os03g0352300|Os03g0352300|transcript|Os03t0352300-01|protein_coding|8/8|c.1420G>T|p.Val474Leu|1506/1835|1420/1659|474/552||,A|missense_variant|MODERATE|Os03g0352300|Os03g0352300|transcript|Os03t0352300-02|protein_coding|4/4|c.433G>T|p.Val145Leu|435/909|433/672|145/223||WARNING_TRANSCRIPT_NO_START_CODON,A|missense_variant|MODERATE|Os03g0352300|Os03g0352300|transcrip…
3	13223050	C	G	ANN=G|missense_variant|MODERATE|Os03g0352300|Os03g0352300|transcript|Os03t0352300-01|protein_coding|8/8|c.1387G>C|p.Gly463Arg|1473/1835|1387/1659|463/552||,G|missense_variant|MODERATE|Os03g0352300|Os03g0352300|transcript|Os03t0352300-02|protein_coding|4/4|c.400G>C|p.Gly134Arg|402/909|400/672|134/223||WARNING_TRANSCRIPT_NO_START_CODON,G|missense_variant|MODERATE|Os03g0352300|Os03g0352300|transcrip…
3	13231563	G	T	ANN=T|missense_variant|MODERATE|OsNug2|Os03g0352400|transcript|Os03t0352400-01|protein_coding|11/11|c.1452G>T|p.Glu484Asp|1547/2054|1452/1608|484/535||,T|upstream_gene_variant|MODIFIER|OsINO80|Os03g0352450|transcript|Os03t0352450-00|protein_coding||c.-5120G>T|||||4945|
3	13264119	C	T	ANN=T|missense_variant|MODERATE|Os03g0353000|Os03g0353000|transcript|Os03t0353000-01|protein_coding|2/2|c.337C>T|p.His113Tyr|359/684|337/417|113/138||,T|upstream_gene_variant|MODIFIER|Os03g0352800|Os03g0352800|transcript|Os03t0352800-01|protein_coding||c.-3595G>A|||||3481|
3	13274689	A	G	ANN=G|missense_variant|MODERATE|Os_F0699|Os03g0353300|transcript|Os03t0353300-01|protein_coding|3/3|c.871A>G|p.Lys291Glu|872/1433|871/1089|291/362||WARNING_TRANSCRIPT_NO_START_CODON,G|downstream_gene_variant|MODIFIER|Os03g0353333|Os03g0353333|transcript|Os03t0353333-00|protein_coding||c.*1487T>C|||||1487|
3	13303666	T	G	ANN=G|missense_variant|MODERATE|OsSTA99|Os03g0353600|transcript|Os03t0353600-01|protein_coding|3/6|c.967T>G|p.Ser323Ala|969/1761|967/1759|323/585||WARNING_TRANSCRIPT_INCOMPLETE,G|upstream_gene_variant|MODIFIER|Os03g0353701|Os03g0353701|transcript|Os03t0353701-01|protein_coding||c.-4626T>G|||||4626|WARNING_TRANSCRIPT_NO_START_CODON
3	13309329	G	T	ANN=T|missense_variant|MODERATE|Os03g0353701|Os03g0353701|transcript|Os03t0353701-01|protein_coding|2/2|c.499G>T|p.Asp167Tyr|499/878|499/504|167/167||WARNING_TRANSCRIPT_NO_START_CODON,T|downstream_gene_variant|MODIFIER|OsSTA99|Os03g0353600|transcript|Os03t0353600-01|protein_coding||c.*3692G>T|||||3692|WARNING_TRANSCRIPT_INCOMPLETE
3	16260428	T	C	ANN=C|missense_variant|MODERATE|Os03g0400901|Os03g0400901|transcript|Os03t0400901-00|protein_coding|1/1|c.725A>G|p.Tyr242Cys|725/1250|725/1245|242/414||WARNING_TRANSCRIPT_NO_START_CODON,C|downstream_gene_variant|MODIFIER|Os03g0400800|Os03g0400800|transcript|Os03t0400800-00|protein_coding||c.*2440A>G|||||2440|
3	16260660	C	T	ANN=T|missense_variant|MODERATE|Os03g0400901|Os03g0400901|transcript|Os03t0400901-00|protein_coding|1/1|c.493G>A|p.Ala165Thr|493/1250|493/1245|165/414||WARNING_TRANSCRIPT_NO_START_CODON,T|downstream_gene_variant|MODIFIER|Os03g0400800|Os03g0400800|transcript|Os03t0400800-00|protein_coding||c.*2208G>A|||||2208|
3	16263079	C	T	ANN=T|missense_variant|MODERATE|Os03g0400800|Os03g0400800|transcript|Os03t0400800-00|protein_coding|2/2|c.2051G>A|p.Arg684His|2051/2262|2051/2262|684/753||,T|upstream_gene_variant|MODIFIER|Os03g0400901|Os03g0400901|transcript|Os03t0400901-00|protein_coding||c.-1927G>A|||||1927|WARNING_TRANSCRIPT_NO_START_CODON
3	16263362	G	T	ANN=T|missense_variant|MODERATE|Os03g0400800|Os03g0400800|transcript|Os03t0400800-00|protein_coding|2/2|c.1768C>A|p.Pro590Thr|1768/2262|1768/2262|590/753||,T|upstream_gene_variant|MODIFIER|Os03g0400901|Os03g0400901|transcript|Os03t0400901-00|protein_coding||c.-2210C>A|||||2210|WARNING_TRANSCRIPT_NO_START_CODON
3	16264069	T	C	ANN=C|missense_variant|MODERATE|Os03g0400800|Os03g0400800|transcript|Os03t0400800-00|protein_coding|2/2|c.1061A>G|p.Glu354Gly|1061/2262|1061/2262|354/753||,C|upstream_gene_variant|MODIFIER|Os03g0400901|Os03g0400901|transcript|Os03t0400901-00|protein_coding||c.-2917A>G|||||2917|WARNING_TRANSCRIPT_NO_START_CODON
3	16283872	T	C	ANN=C|missense_variant|MODERATE|Os03g0401100|Os03g0401100|transcript|Os03t0401100-01|protein_coding|1/6|c.574T>C|p.Ser192Pro|1091/3802|574/1908|192/635||
3	16283978	T	C	ANN=C|missense_variant|MODERATE|Os03g0401100|Os03g0401100|transcript|Os03t0401100-01|protein_coding|1/6|c.680T>C|p.Ile227Thr|1197/3802|680/1908|227/635||
3	16284368	A	G	ANN=G|missense_variant|MODERATE|Os03g0401100|Os03g0401100|transcript|Os03t0401100-01|protein_coding|1/6|c.1070A>G|p.His357Arg|1587/3802|1070/1908|357/635||
3	16294316	G	A	ANN=A|missense_variant|MODERATE|OsDjC30|Os03g0401200|transcript|Os03t0401200-01|protein_coding|2/2|c.2015C>T|p.Ala672Val|2393/2925|2015/2247|672/748||,A|downstream_gene_variant|MODIFIER|Os03g0401100|Os03g0401100|transcript|Os03t0401100-01|protein_coding||c.*5215G>A|||||3838|
3	16295783	C	T	ANN=T|missense_variant|MODERATE|OsDjC30|Os03g0401200|transcript|Os03t0401200-01|protein_coding|2/2|c.548G>A|p.Arg183His|926/2925|548/2247|183/748||
3	16296108	A	T	ANN=T|missense_variant|MODERATE|OsDjC30|Os03g0401200|transcript|Os03t0401200-01|protein_coding|2/2|c.223T>A|p.Ser75Thr|601/2925|223/2247|75/748||
3	16306048	C	A	ANN=A|missense_variant|MODERATE|SUS1|Os03g0401300|transcript|Os03t0401300-01|protein_coding|1/14|c.10G>T|p.Ala4Ser|42/2907|10/2451|4/816||,A|3_prime_UTR_variant|MODIFIER|Os03g0401333|Os03g0401333|transcript|Os03t0401333-00|protein_coding|14/14|c.*1398C>A|||||2905|,A|upstream_gene_variant|MODIFIER|SUS1|Os03g0401300|transcript|Os03t0401300-02|protein_coding||c.-3120G>T|||||3118|WARNING_TRANSCRIPT_N…
3	16729992	G	C	ANN=C|missense_variant|MODERATE|GS3|Os03g0407400|transcript|Os03t0407400-01|protein_coding|5/5|c.422C>G|p.Ser141Cys|454/945|422/699|141/232||
3	16733441	G	T	ANN=T|stop_gained|HIGH|GS3|Os03g0407400|transcript|Os03t0407400-01|protein_coding|2/5|c.165C>A|p.Cys55*|197/945|165/699|55/232||;LOF=(GS3|Os03g0407400|1|1.00);NMD=(GS3|Os03g0407400|1|1.00)
3	16749510	C	G	ANN=G|missense_variant|MODERATE|OsRLCK110|Os03g0407900|transcript|Os03t0407900-01|protein_coding|5/5|c.1499G>C|p.Cys500Ser|1667/1859|1499/1503|500/500||,G|upstream_gene_variant|MODIFIER|Os03g0408101|Os03g0408101|transcript|Os03t0408101-00|protein_coding||c.-1316C>G|||||229|
3	16753383	A	G	ANN=G|missense_variant|MODERATE|Os03g0408101|Os03g0408101|transcript|Os03t0408101-00|protein_coding|4/4|c.248A>G|p.Tyr83Cys|1335/1431|248/255|83/84||,G|intron_variant|MODIFIER|OsRLCK110|Os03g0407900|transcript|Os03t0407900-01|protein_coding|1/4|c.583-20T>C||||||
4	13863464	A	G	ANN=G|missense_variant|MODERATE|Os04g0307466|Os04g0307466|transcript|Os04t0307466-01|protein_coding|3/3|c.14T>C|p.Leu5Pro|422/1093|14/261|5/86||,G|5_prime_UTR_variant|MODIFIER|OsWAK32|Os04g0307500|transcript|Os04t0307500-01|protein_coding|2/5|c.-165A>G|||||658|
4	13864513	G	T	ANN=T|missense_variant|MODERATE|OsWAK32|Os04g0307500|transcript|Os04t0307500-01|protein_coding|3/5|c.392G>T|p.Arg131Ile|677/3221|392/1110|131/369||,T|intron_variant|MODIFIER|Os04g0307466|Os04g0307466|transcript|Os04t0307466-01|protein_coding|2/2|c.-60-976C>A||||||
4	13865874	G	A	ANN=A|missense_variant|MODERATE|OsWAK32|Os04g0307500|transcript|Os04t0307500-01|protein_coding|4/5|c.628G>A|p.Val210Ile|913/3221|628/1110|210/369||,A|intron_variant|MODIFIER|Os04g0307466|Os04g0307466|transcript|Os04t0307466-01|protein_coding|2/2|c.-60-2337C>T||||||
4	13894132	C	T	ANN=T|splice_donor_variant&intron_variant|HIGH|Os04g0307800|Os04g0307800|transcript|Os04t0307800-00|protein_coding|1/4|c.279+1G>A||||||WARNING_TRANSCRIPT_NO_START_CODON;LOF=(Os04g0307800|Os04g0307800|1|1.00)
4	13914139	A	C	ANN=C|missense_variant|MODERATE|Os04g0307900|Os04g0307900|transcript|Os04t0307900-00|protein_coding|1/1|c.271A>C|p.Lys91Gln|271/1194|271/1194|91/397||,C|downstream_gene_variant|MODIFIER|OsWAK35|Os04g0308000|transcript|Os04t0308000-02|pseudogene||n.*4417T>G|||||4417|,C|downstream_gene_variant|MODIFIER|OsWAK35|Os04g0308000|transcript|Os04t0308000-03|pseudogene||n.*4418T>G|||||4418|
4	13924310	A	C	ANN=C|missense_variant|MODERATE|OsWAK35|Os04g0308100|transcript|Os04t0308100-01|protein_coding|1/1|c.421A>C|p.Ile141Leu|423/1228|421/855|141/284||WARNING_TRANSCRIPT_NO_START_CODON,C|downstream_gene_variant|MODIFIER|OsWAK35|Os04g0308000|transcript|Os04t0308000-01|protein_coding||c.*2617T>G|||||1999|WARNING_TRANSCRIPT_NO_START_CODON,C|intron_variant|MODIFIER|OsWAK35|Os04g0308000|transcript|Os04t030…
4	13924658	A	C	ANN=C|missense_variant|MODERATE|OsWAK35|Os04g0308100|transcript|Os04t0308100-01|protein_coding|1/1|c.769A>C|p.Asn257His|771/1228|769/855|257/284||WARNING_TRANSCRIPT_NO_START_CODON,C|downstream_gene_variant|MODIFIER|OsWAK35|Os04g0308000|transcript|Os04t0308000-01|protein_coding||c.*2269T>G|||||1651|WARNING_TRANSCRIPT_NO_START_CODON,C|intron_variant|MODIFIER|OsWAK35|Os04g0308000|transcript|Os04t030…
4	14056548	T	A	ANN=A|missense_variant|MODERATE|OsWAK36|Os04g0310400|transcript|Os04t0310400-00|protein_coding|1/3|c.14T>A|p.Val5Asp|14/1882|14/1071|5/356||
4	14058045	A	T	ANN=T|missense_variant|MODERATE|OsWAK36|Os04g0310400|transcript|Os04t0310400-00|protein_coding|2/3|c.757A>T|p.Ser253Cys|757/1882|757/1071|253/356||,T|downstream_gene_variant|MODIFIER|Os04g0310500|Os04g0310500|transcript|Os04t0310500-01|protein_coding||c.*9346T>A|||||4611|,T|downstream_gene_variant|MODIFIER|Os04g0310500|Os04g0310500|transcript|Os04t0310500-02|protein_coding||c.*4890T>A|||||4611|
4	14062943	G	A	ANN=A|missense_variant|MODERATE|Os04g0310500|Os04g0310500|transcript|Os04t0310500-02|protein_coding|3/3|c.292C>T|p.Pro98Ser|379/666|292/300|98/99||,A|3_prime_UTR_variant|MODIFIER|Os04g0310500|Os04g0310500|transcript|Os04t0310500-01|protein_coding|2/2|c.*4448C>T|||||4448|,A|downstream_gene_variant|MODIFIER|OsWAK36|Os04g0310400|transcript|Os04t0310400-00|protein_coding||c.*2728G>A|||||1917|
4	14072919	G	C	ANN=C|missense_variant|MODERATE|OsACS9|Os04g0310800|transcript|Os04t0310800-01|protein_coding|2/2|c.1575C>G|p.His525Gln|1575/1853|1575/1668|525/555||,C|missense_variant|MODERATE|Os04g0310900|Os04g0310900|transcript|Os04t0310900-00|protein_coding|1/2|c.15G>C|p.Met5Ile|52/1554|15/1517|5/504||WARNING_TRANSCRIPT_INCOMPLETE,C|upstream_gene_variant|MODIFIER|Os04g0310500|Os04g0310500|transcript|Os04t031…
4	24109239	T	A	ANN=A|missense_variant|MODERATE|OsMSRA2.2|Os04g0482100|transcript|Os04t0482100-00|protein_coding|3/3|c.425A>T|p.Lys142Met|629/777|425/573|142/190||,A|upstream_gene_variant|MODIFIER|OsMSRA2.1|Os04g0482000|transcript|Os04t0482000-01|protein_coding||c.-4449A>T|||||4371|
4	24135222	C	G	ANN=G|missense_variant|MODERATE|Os04g0482800|Os04g0482800|transcript|Os04t0482800-01|protein_coding|4/4|c.1119G>C|p.Met373Ile|1268/2484|1119/1986|373/661||,G|upstream_gene_variant|MODIFIER|Os04g0482700|Os04g0482700|transcript|Os04t0482700-01|protein_coding||c.-2027G>C|||||1961|,G|downstream_gene_variant|MODIFIER|Os04g0482900|Os04g0482900|transcript|Os04t0482900-01|protein_coding||c.*4365G>C|||||4…
4	24160056	C	G	ANN=G|missense_variant|MODERATE|Os04g0483200|Os04g0483200|transcript|Os04t0483200-01|protein_coding|8/10|c.1111C>G|p.Gln371Glu|1882/2663|1111/1767|371/588||,G|downstream_gene_variant|MODIFIER|Os04g0483400|Os04g0483400|transcript|Os04t0483400-01|protein_coding||c.*1572G>C|||||1379|WARNING_TRANSCRIPT_NO_START_CODON,G|downstream_gene_variant|MODIFIER|Os04g0483200|Os04g0483200|transcript|Os04t0483200…
4	24160700	C	T	ANN=T|missense_variant|MODERATE|Os04g0483200|Os04g0483200|transcript|Os04t0483200-01|protein_coding|10/10|c.1567C>T|p.Arg523Cys|2338/2663|1567/1767|523/588||,T|downstream_gene_variant|MODIFIER|Os04g0483400|Os04g0483400|transcript|Os04t0483400-01|protein_coding||c.*928G>A|||||735|WARNING_TRANSCRIPT_NO_START_CODON,T|downstream_gene_variant|MODIFIER|Os04g0483200|Os04g0483200|transcript|Os04t0483200-…
4	24164559	A	T	ANN=T|missense_variant|MODERATE|Os04g0483400|Os04g0483400|transcript|Os04t0483400-01|protein_coding|1/3|c.621T>A|p.Asp207Glu|623/2664|621/2469|207/822||WARNING_TRANSCRIPT_NO_START_CODON,T|upstream_gene_variant|MODIFIER|Os04g0483450|Os04g0483450|transcript|Os04t0483450-00|protein_coding||c.-4582A>T|||||3918|WARNING_TRANSCRIPT_NO_START_CODON,T|downstream_gene_variant|MODIFIER|Os04g0483200|Os04g0483…
4	24239492	T	C	ANN=C|missense_variant|MODERATE|OsHAG703|Os04g0484900|transcript|Os04t0484900-01|protein_coding|3/9|c.641A>G|p.Asn214Ser|689/1880|641/1722|214/573||,C|upstream_gene_variant|MODIFIER|Os04g0484850|Os04g0484850|transcript|Os04t0484850-00|protein_coding||c.-5508A>G|||||3002|WARNING_TRANSCRIPT_INCOMPLETE,C|upstream_gene_variant|MODIFIER|OsRpn7|Os04g0485000|transcript|Os04t0485000-01|protein_coding||c.…
4	24294945	T	C	ANN=C|missense_variant|MODERATE|Os_F0726|Os04g0486300|transcript|Os04t0486300-01|protein_coding|1/1|c.716T>C|p.Ile239Thr|888/1664|716/1275|239/424||,C|upstream_gene_variant|MODIFIER|rml1|Os04g0486400|transcript|Os04t0486400-01|protein_coding||c.-1608T>C|||||1513|,C|downstream_gene_variant|MODIFIER|Os04g0486350|Os04g0486350|transcript|Os04t0486350-00|protein_coding||c.*1535A>G|||||1485|
4	24295056	C	T	ANN=T|missense_variant|MODERATE|Os_F0726|Os04g0486300|transcript|Os04t0486300-01|protein_coding|1/1|c.827C>T|p.Ala276Val|999/1664|827/1275|276/424||,T|upstream_gene_variant|MODIFIER|rml1|Os04g0486400|transcript|Os04t0486400-01|protein_coding||c.-1497C>T|||||1402|,T|downstream_gene_variant|MODIFIER|Os04g0486350|Os04g0486350|transcript|Os04t0486350-00|protein_coding||c.*1424G>A|||||1374|
4	24295272	G	A	ANN=A|missense_variant|MODERATE|Os_F0726|Os04g0486300|transcript|Os04t0486300-01|protein_coding|1/1|c.1043G>A|p.Gly348Glu|1215/1664|1043/1275|348/424||,A|upstream_gene_variant|MODIFIER|rml1|Os04g0486400|transcript|Os04t0486400-01|protein_coding||c.-1281G>A|||||1186|,A|downstream_gene_variant|MODIFIER|Os04g0486350|Os04g0486350|transcript|Os04t0486350-00|protein_coding||c.*1208C>T|||||1158|
4	24295434	G	A	ANN=A|missense_variant|MODERATE|Os_F0726|Os04g0486300|transcript|Os04t0486300-01|protein_coding|1/1|c.1205G>A|p.Gly402Asp|1377/1664|1205/1275|402/424||,A|upstream_gene_variant|MODIFIER|rml1|Os04g0486400|transcript|Os04t0486400-01|protein_coding||c.-1119G>A|||||1024|,A|downstream_gene_variant|MODIFIER|Os04g0486350|Os04g0486350|transcript|Os04t0486350-00|protein_coding||c.*1046C>T|||||996|
4	24299370	C	G	ANN=G|missense_variant|MODERATE|rml1|Os04g0486400|transcript|Os04t0486400-01|protein_coding|4/5|c.816C>G|p.Asp272Glu|911/1872|816/1158|272/385||,G|5_prime_UTR_variant|MODIFIER|Os04g0486350|Os04g0486350|transcript|Os04t0486350-00|protein_coding|2/4|c.-484G>C|||||2531|,G|downstream_gene_variant|MODIFIER|Os_F0726|Os04g0486300|transcript|Os04t0486300-01|protein_coding||c.*3866C>G|||||3649|,G|downstre…
4	24917453	C	T	ANN=T|missense_variant|MODERATE|Os04g0498650|Os04g0498650|transcript|Os04t0498650-00|protein_coding|1/2|c.442G>A|p.Val148Ile|646/1789|442/489|148/162||,T|synonymous_variant|LOW|SAMDC|Os04g0498600|transcript|Os04t0498600-01|protein_coding|3/3|c.795C>T|p.Tyr265Tyr|1377/2710|795/1197|265/398||,T|synonymous_variant|LOW|SAMDC|Os04g0498600|transcript|Os04t0498600-02|protein_coding|1/1|c.534C>T|p.Tyr178…
4	24917480	C	T	ANN=T|missense_variant|MODERATE|Os04g0498650|Os04g0498650|transcript|Os04t0498650-00|protein_coding|1/2|c.415G>A|p.Val139Ile|619/1789|415/489|139/162||,T|synonymous_variant|LOW|SAMDC|Os04g0498600|transcript|Os04t0498600-01|protein_coding|3/3|c.822C>T|p.Asp274Asp|1404/2710|822/1197|274/398||,T|synonymous_variant|LOW|SAMDC|Os04g0498600|transcript|Os04t0498600-02|protein_coding|1/1|c.561C>T|p.Asp187…
4	24917510	G	A	ANN=A|missense_variant|MODERATE|Os04g0498650|Os04g0498650|transcript|Os04t0498650-00|protein_coding|1/2|c.385C>T|p.His129Tyr|589/1789|385/489|129/162||,A|synonymous_variant|LOW|SAMDC|Os04g0498600|transcript|Os04t0498600-01|protein_coding|3/3|c.852G>A|p.Val284Val|1434/2710|852/1197|284/398||,A|synonymous_variant|LOW|SAMDC|Os04g0498600|transcript|Os04t0498600-02|protein_coding|1/1|c.591G>A|p.Val197…
4	24917528	C	T	ANN=T|missense_variant|MODERATE|Os04g0498650|Os04g0498650|transcript|Os04t0498650-00|protein_coding|1/2|c.367G>A|p.Ala123Thr|571/1789|367/489|123/162||,T|synonymous_variant|LOW|SAMDC|Os04g0498600|transcript|Os04t0498600-01|protein_coding|3/3|c.870C>T|p.Cys290Cys|1452/2710|870/1197|290/398||,T|synonymous_variant|LOW|SAMDC|Os04g0498600|transcript|Os04t0498600-02|protein_coding|1/1|c.609C>T|p.Cys203…
4	24917570	T	C	ANN=C|missense_variant|MODERATE|Os04g0498650|Os04g0498650|transcript|Os04t0498650-00|protein_coding|1/2|c.325A>G|p.Thr109Ala|529/1789|325/489|109/162||,C|synonymous_variant|LOW|SAMDC|Os04g0498600|transcript|Os04t0498600-01|protein_coding|3/3|c.912T>C|p.Gly304Gly|1494/2710|912/1197|304/398||,C|synonymous_variant|LOW|SAMDC|Os04g0498600|transcript|Os04t0498600-02|protein_coding|1/1|c.651T>C|p.Gly217…
4	24917597	A	G	ANN=G|missense_variant|MODERATE|Os04g0498650|Os04g0498650|transcript|Os04t0498650-00|protein_coding|1/2|c.298T>C|p.Cys100Arg|502/1789|298/489|100/162||,G|synonymous_variant|LOW|SAMDC|Os04g0498600|transcript|Os04t0498600-01|protein_coding|3/3|c.939A>G|p.Ala313Ala|1521/2710|939/1197|313/398||,G|synonymous_variant|LOW|SAMDC|Os04g0498600|transcript|Os04t0498600-02|protein_coding|1/1|c.678A>G|p.Ala226…
4	24917660	T	C	ANN=C|missense_variant|MODERATE|Os04g0498650|Os04g0498650|transcript|Os04t0498650-00|protein_coding|1/2|c.235A>G|p.Thr79Ala|439/1789|235/489|79/162||,C|synonymous_variant|LOW|SAMDC|Os04g0498600|transcript|Os04t0498600-01|protein_coding|3/3|c.1002T>C|p.Gly334Gly|1584/2710|1002/1197|334/398||,C|synonymous_variant|LOW|SAMDC|Os04g0498600|transcript|Os04t0498600-02|protein_coding|1/1|c.741T>C|p.Gly247…
4	24917693	T	C	ANN=C|missense_variant|MODERATE|Os04g0498650|Os04g0498650|transcript|Os04t0498650-00|protein_coding|1/2|c.202A>G|p.Ser68Gly|406/1789|202/489|68/162||,C|synonymous_variant|LOW|SAMDC|Os04g0498600|transcript|Os04t0498600-01|protein_coding|3/3|c.1035T>C|p.Thr345Thr|1617/2710|1035/1197|345/398||,C|synonymous_variant|LOW|SAMDC|Os04g0498600|transcript|Os04t0498600-02|protein_coding|1/1|c.774T>C|p.Thr258…
4	24933969	G	A	ANN=A|missense_variant|MODERATE|Os04g0498800|Os04g0498800|transcript|Os04t0498800-01|protein_coding|7/12|c.898G>A|p.Ala300Thr|1063/2030|898/1737|300/578||,A|downstream_gene_variant|MODIFIER|Os04g0498900|Os04g0498900|transcript|Os04t0498900-01|protein_coding||c.*2293C>T|||||2091|
4	24935614	C	T	ANN=T|missense_variant|MODERATE|Os04g0498800|Os04g0498800|transcript|Os04t0498800-01|protein_coding|12/12|c.1571C>T|p.Ala524Val|1736/2030|1571/1737|524/578||,T|upstream_gene_variant|MODIFIER|Os04g0499100|Os04g0499100|transcript|Os04t0499100-01|protein_coding||c.-5029C>T|||||4901|,T|downstream_gene_variant|MODIFIER|Os04g0498900|Os04g0498900|transcript|Os04t0498900-01|protein_coding||c.*648G>A|||||…
4	24937594	T	C	ANN=C|missense_variant|MODERATE|Os04g0498900|Os04g0498900|transcript|Os04t0498900-01|protein_coding|4/7|c.385A>G|p.Thr129Ala|536/1334|385/981|129/326||,C|upstream_gene_variant|MODIFIER|Os04g0499100|Os04g0499100|transcript|Os04t0499100-01|protein_coding||c.-3049T>C|||||2921|,C|downstream_gene_variant|MODIFIER|Os04g0498800|Os04g0498800|transcript|Os04t0498800-01|protein_coding||c.*1814T>C|||||1686|…
4	24963273	A	G	ANN=G|missense_variant|MODERATE|Os04g0499800|Os04g0499800|transcript|Os04t0499800-01|protein_coding|1/3|c.73A>G|p.Ser25Gly|186/3248|73/303|25/100||WARNING_TRANSCRIPT_NO_START_CODON
4	28605249	T	A	ANN=A|missense_variant|MODERATE|ROC4|Os04g0569100|transcript|Os04t0569100-02|protein_coding|5/9|c.1234A>T|p.Thr412Ser|1370/3109|1234/2442|412/813||,A|missense_variant|MODERATE|ROC4|Os04g0569100|transcript|Os04t0569100-01|protein_coding|5/9|c.1234A>T|p.Thr412Ser|1370/3088|1234/2421|412/806||,A|downstream_gene_variant|MODIFIER|RFC4|Os04g0569000|transcript|Os04t0569000-01|protein_coding||c.*5224T>A|…
5	28480050	G	A	ANN=A|missense_variant|MODERATE|Os05g0571400|Os05g0571400|transcript|Os05t0571400-02|protein_coding|1/3|c.374C>T|p.Thr125Ile|1167/2753|374/1041|125/346||,A|upstream_gene_variant|MODIFIER|Os05g0571300|Os05g0571300|transcript|Os05t0571300-02|protein_coding||c.-3855C>T|||||3581|,A|upstream_gene_variant|MODIFIER|Os05g0571300|Os05g0571300|transcript|Os05t0571300-03|protein_coding||c.-3894C>T|||||3894|…
5	28480128	C	T	ANN=T|missense_variant|MODERATE|Os05g0571400|Os05g0571400|transcript|Os05t0571400-02|protein_coding|1/3|c.296G>A|p.Arg99Gln|1089/2753|296/1041|99/346||,T|upstream_gene_variant|MODIFIER|Os05g0571300|Os05g0571300|transcript|Os05t0571300-02|protein_coding||c.-3933G>A|||||3659|,T|upstream_gene_variant|MODIFIER|Os05g0571300|Os05g0571300|transcript|Os05t0571300-03|protein_coding||c.-3972G>A|||||3972|,T…
5	28487452	G	C	ANN=C|missense_variant|MODERATE|Os05g0571600|Os05g0571600|transcript|Os05t0571600-01|protein_coding|1/1|c.105G>C|p.Glu35Asp|210/958|105/507|35/168||,C|upstream_gene_variant|MODIFIER|Os05g0571400|Os05g0571400|transcript|Os05t0571400-01|protein_coding||c.-4572C>G|||||4551|,C|downstream_gene_variant|MODIFIER|OsFbox282|Os05g0571700|transcript|Os05t0571700-01|protein_coding||c.*2531C>G|||||2284|
5	28487739	C	G	ANN=G|missense_variant|MODERATE|Os05g0571600|Os05g0571600|transcript|Os05t0571600-01|protein_coding|1/1|c.392C>G|p.Ala131Gly|497/958|392/507|131/168||,G|upstream_gene_variant|MODIFIER|Os05g0571400|Os05g0571400|transcript|Os05t0571400-01|protein_coding||c.-4859G>C|||||4838|,G|downstream_gene_variant|MODIFIER|OsFbox282|Os05g0571700|transcript|Os05t0571700-01|protein_coding||c.*2244G>C|||||1997|
6	1765761	T	G	ANN=G|splice_donor_variant&intron_variant|HIGH|WX1|Os06g0133000|transcript|Os06t0133000-01|protein_coding|1/13|c.-33+2T>G||||||,G|upstream_gene_variant|MODIFIER|OsRAD1|Os06g0132600|transcript|Os06t0132600-02|protein_coding||c.-4952A>C|||||4877|,G|upstream_gene_variant|MODIFIER|OsRAD1|Os06g0132600|transcript|Os06t0132600-01|protein_coding||c.-4952A>C|||||4877|,G|upstream_gene_variant|MODIFIER|WX1|…
6	1768006	A	C	ANN=C|missense_variant&splice_region_variant|MODERATE|WX1|Os06g0133000|transcript|Os06t0133000-01|protein_coding|6/14|c.671A>C|p.Tyr224Ser|841/2174|671/1830|224/609||,C|missense_variant&splice_region_variant|MODERATE|WX1|Os06g0133000|transcript|Os06t0133000-02|protein_coding|5/13|c.671A>C|p.Tyr224Ser|1122/2534|671/1830|224/609||,C|downstream_gene_variant|MODIFIER|Os06g0133100|Os06g0133100|transcr…
6	1768998	C	T	ANN=T|missense_variant|MODERATE|WX1|Os06g0133000|transcript|Os06t0133000-01|protein_coding|10/14|c.1243C>T|p.Pro415Ser|1413/2174|1243/1830|415/609||,T|missense_variant|MODERATE|WX1|Os06g0133000|transcript|Os06t0133000-02|protein_coding|9/13|c.1243C>T|p.Pro415Ser|1694/2534|1243/1830|415/609||,T|downstream_gene_variant|MODIFIER|Os06g0133100|Os06g0133100|transcript|Os06t0133100-01|protein_coding||c.…
6	1858522	A	T	ANN=T|missense_variant|MODERATE|Os06g0134500|Os06g0134500|transcript|Os06t0134500-01|protein_coding|4/7|c.680T>A|p.Leu227His|881/1398|680/1095|227/364||,T|upstream_gene_variant|MODIFIER|Os06g0134466|Os06g0134466|transcript|Os06t0134466-01|protein_coding||c.-4849T>A|||||4849|WARNING_TRANSCRIPT_NO_START_CODON
6	1860759	A	G	ANN=G|missense_variant|MODERATE|Os06g0134500|Os06g0134500|transcript|Os06t0134500-01|protein_coding|1/7|c.94T>C|p.Phe32Leu|295/1398|94/1095|32/364||,G|upstream_gene_variant|MODIFIER|Os06g0134700|Os06g0134700|transcript|Os06t0134700-01|protein_coding||c.-3816A>G|||||3814|WARNING_TRANSCRIPT_NO_START_CODON
6	1864975	A	G	ANN=G|missense_variant|MODERATE|Os06g0134700|Os06g0134700|transcript|Os06t0134700-01|protein_coding|1/4|c.401A>G|p.Glu134Gly|403/2411|401/2019|134/672||WARNING_TRANSCRIPT_NO_START_CODON,G|upstream_gene_variant|MODIFIER|Os06g0134500|Os06g0134500|transcript|Os06t0134500-01|protein_coding||c.-4123T>C|||||3922|,G|downstream_gene_variant|MODIFIER|Os06g0134750|Os06g0134750|transcript|Os06t0134750-00|pr…
6	1866035	A	G	ANN=G|missense_variant|MODERATE|Os06g0134700|Os06g0134700|transcript|Os06t0134700-01|protein_coding|2/4|c.439A>G|p.Thr147Ala|441/2411|439/2019|147/672||WARNING_TRANSCRIPT_NO_START_CODON,G|3_prime_UTR_variant|MODIFIER|Os06g0134750|Os06g0134750|transcript|Os06t0134750-00|protein_coding|2/2|c.*1123T>C|||||1123|,G|upstream_gene_variant|MODIFIER|Os06g0134500|Os06g0134500|transcript|Os06t0134500-01|pro…
6	1866173	A	G	ANN=G|missense_variant|MODERATE|Os06g0134700|Os06g0134700|transcript|Os06t0134700-01|protein_coding|2/4|c.577A>G|p.Ser193Gly|579/2411|577/2019|193/672||WARNING_TRANSCRIPT_NO_START_CODON,G|3_prime_UTR_variant|MODIFIER|Os06g0134750|Os06g0134750|transcript|Os06t0134750-00|protein_coding|2/2|c.*985T>C|||||985|
6	1867425	C	A	ANN=A|missense_variant|MODERATE|Os06g0134750|Os06g0134750|transcript|Os06t0134750-00|protein_coding|1/2|c.315G>T|p.Arg105Ser|378/1702|315/414|105/137||,A|synonymous_variant|LOW|Os06g0134700|Os06g0134700|transcript|Os06t0134700-01|protein_coding|4/4|c.1623C>A|p.Ile541Ile|1625/2411|1623/2019|541/672||WARNING_TRANSCRIPT_NO_START_CODON
6	2155533	T	C	ANN=C|missense_variant|MODERATE|Os06g0141133|Os06g0141133|transcript|Os06t0141133-00|protein_coding|1/1|c.418T>C|p.Cys140Arg|419/1399|418/1398|140/465||WARNING_TRANSCRIPT_NO_START_CODON,C|synonymous_variant|LOW|Os06g0141100|Os06g0141100|transcript|Os06t0141100-00|protein_coding|2/2|c.1107A>G|p.Ala369Ala|1107/1563|1107/1563|369/520||,C|upstream_gene_variant|MODIFIER|Os06g0140900|Os06g0140900|trans…
6	2159725	C	A	ANN=A|missense_variant|MODERATE|Os06g0141166|Os06g0141166|transcript|Os06t0141166-00|protein_coding|3/6|c.676G>T|p.Asp226Tyr|676/1218|676/1218|226/405||,A|upstream_gene_variant|MODIFIER|Os06g0141100|Os06g0141100|transcript|Os06t0141100-00|protein_coding||c.-3009G>T|||||3009|,A|downstream_gene_variant|MODIFIER|Os06g0141133|Os06g0141133|transcript|Os06t0141133-00|protein_coding||c.*3212C>A|||||3212…
6	2180438	C	G	ANN=G|missense_variant|MODERATE|OsENOD93|Os06g0141700|transcript|Os06t0141700-01|protein_coding|3/3|c.331G>C|p.Ala111Pro|467/655|331/348|111/115||,G|upstream_gene_variant|MODIFIER|OsENOD93|Os06g0141600|transcript|Os06t0141600-01|protein_coding||c.-3816G>C|||||3512|,G|upstream_gene_variant|MODIFIER|Os06g0141800|Os06g0141800|transcript|Os06t0141800-01|protein_coding||c.-4855C>G|||||4252|
6	2185308	G	A	ANN=A|missense_variant|MODERATE|Os06g0141800|Os06g0141800|transcript|Os06t0141800-01|protein_coding|1/1|c.16G>A|p.Ala6Thr|619/1305|16/363|6/120||,A|upstream_gene_variant|MODIFIER|OsENOD93|Os06g0141700|transcript|Os06t0141700-01|protein_coding||c.-4330C>T|||||4194|,A|upstream_gene_variant|MODIFIER|OsTP1|Os06g0142000|transcript|Os06t0142000-00|protein_coding||c.-3209G>A|||||3102|,A|downstream_gene_…
6	2185335	G	T	ANN=T|missense_variant|MODERATE|Os06g0141800|Os06g0141800|transcript|Os06t0141800-01|protein_coding|1/1|c.43G>T|p.Ala15Ser|646/1305|43/363|15/120||,T|upstream_gene_variant|MODIFIER|OsENOD93|Os06g0141700|transcript|Os06t0141700-01|protein_coding||c.-4357C>A|||||4221|,T|upstream_gene_variant|MODIFIER|OsTP1|Os06g0142000|transcript|Os06t0142000-00|protein_coding||c.-3182G>T|||||3075|,T|downstream_gen…
6	2185596	C	T	ANN=T|missense_variant|MODERATE|Os06g0141800|Os06g0141800|transcript|Os06t0141800-01|protein_coding|1/1|c.304C>T|p.Pro102Ser|907/1305|304/363|102/120||,T|upstream_gene_variant|MODIFIER|OsENOD93|Os06g0141700|transcript|Os06t0141700-01|protein_coding||c.-4618G>A|||||4482|,T|upstream_gene_variant|MODIFIER|OsTP1|Os06g0142000|transcript|Os06t0142000-00|protein_coding||c.-2921C>T|||||2814|,T|downstream…
6	2190753	A	G	ANN=G|missense_variant|MODERATE|OsTP1|Os06g0142000|transcript|Os06t0142000-00|protein_coding|5/7|c.571A>G|p.Ile191Val|678/1141|571/732|191/243||,G|upstream_gene_variant|MODIFIER|MIR2907|ENSRNA049468085|transcript|ENSRNA049468085-T1|pseudogene||n.-4425T>C|||||4425|,G|upstream_gene_variant|MODIFIER|Os06g0141950|Os06g0141950|transcript|Os06t0141950-00|protein_coding||c.-2886T>C|||||2886|WARNING_TRAN…
6	2197821	A	T	ANN=T|missense_variant|MODERATE|OsFbox291|Os06g0142100|transcript|Os06t0142100-00|protein_coding|4/5|c.1082A>T|p.Tyr361Phe|1082/1539|1082/1539|361/512||,T|downstream_gene_variant|MODIFIER|Os06g0142050|Os06g0142050|transcript|Os06t0142050-00|protein_coding||c.*3376A>T|||||3039|WARNING_TRANSCRIPT_NO_START_CODON,T|downstream_gene_variant|MODIFIER|OSENOD93A|Os06g0142200|transcript|Os06t0142200-01|pro…
6	2197896	C	A	ANN=A|missense_variant&splice_region_variant|MODERATE|OsFbox291|Os06g0142100|transcript|Os06t0142100-00|protein_coding|4/5|c.1157C>A|p.Thr386Asn|1157/1539|1157/1539|386/512||,A|downstream_gene_variant|MODIFIER|Os06g0142050|Os06g0142050|transcript|Os06t0142050-00|protein_coding||c.*3451C>A|||||3114|WARNING_TRANSCRIPT_NO_START_CODON,A|downstream_gene_variant|MODIFIER|OSENOD93A|Os06g0142200|transcri…
6	6679068	G	A	ANN=A|missense_variant|MODERATE|OsATL12|Os06g0228500|transcript|Os06t0228500-01|protein_coding|2/3|c.340G>A|p.Glu114Lys|369/1433|340/1242|114/413||,A|upstream_gene_variant|MODIFIER|Os06g0228666|Os06g0228666|transcript|Os06t0228666-00|protein_coding||c.-3669G>A|||||3569|,A|downstream_gene_variant|MODIFIER|OsAAP12C|Os06g0228600|transcript|Os06t0228600-01|protein_coding||c.*3512C>T|||||3369|
6	6683128	C	T	ANN=T|missense_variant|MODERATE|OsAAP12C|Os06g0228600|transcript|Os06t0228600-01|protein_coding|6/6|c.907G>A|p.Gly303Ser|1035/1726|907/1455|303/484||,T|3_prime_UTR_variant|MODIFIER|Os06g0228666|Os06g0228666|transcript|Os06t0228666-00|protein_coding|1/5|c.*128C>T|||||128|,T|downstream_gene_variant|MODIFIER|OsATL12|Os06g0228500|transcript|Os06t0228500-01|protein_coding||c.*2467C>T|||||2305|,T|downs…
6	6691832	G	T	ANN=T|missense_variant|MODERATE|OsAAP10A|Os06g0228800|transcript|Os06t0228800-01|protein_coding|4/4|c.934C>A|p.Leu312Ile|981/1749|934/1524|312/507||,T|5_prime_UTR_premature_start_codon_gain_variant|LOW|Os06g0228825|Os06g0228825|transcript|Os06t0228825-00|protein_coding|1/4|c.-489G>T||||||,T|5_prime_UTR_variant|MODIFIER|Os06g0228825|Os06g0228825|transcript|Os06t0228825-00|protein_coding|1/4|c.-489…
6	6818770	C	T	ANN=T|missense_variant|MODERATE|Os06g0232000|Os06g0232000|transcript|Os06t0232000-01|protein_coding|1/2|c.826G>A|p.Glu276Lys|1035/1642|826/1146|276/381||,T|missense_variant|MODERATE|Os06g0232000|Os06g0232000|transcript|Os06t0232000-02|protein_coding|1/1|c.40G>A|p.Glu14Lys|40/2404|40/342|14/113||WARNING_TRANSCRIPT_NO_START_CODON,T|missense_variant|MODERATE|Os06g0232000|Os06g0232000|transcript|Os06…
6	6819261	G	A	ANN=A|missense_variant|MODERATE|Os06g0232000|Os06g0232000|transcript|Os06t0232000-01|protein_coding|1/2|c.335C>T|p.Ser112Phe|544/1642|335/1146|112/381||,A|missense_variant|MODERATE|Os06g0232000|Os06g0232000|transcript|Os06t0232000-03|protein_coding|1/2|c.335C>T|p.Ser112Phe|394/1492|335/1146|112/381||,A|upstream_gene_variant|MODIFIER|Os06g0232000|Os06g0232000|transcript|Os06t0232000-02|protein_cod…
6	6823579	A	G	ANN=G|missense_variant|MODERATE|Os06g0232100|Os06g0232100|transcript|Os06t0232100-02|protein_coding|10/10|c.1751T>C|p.Leu584Pro|1797/2340|1751/1797|584/598||,G|missense_variant|MODERATE|Os06g0232100|Os06g0232100|transcript|Os06t0232100-04|protein_coding|3/3|c.296T>C|p.Leu99Pro|296/838|296/342|99/113||WARNING_TRANSCRIPT_NO_START_CODON,G|upstream_gene_variant|MODIFIER|Os06g0232000|Os06g0232000|tran…
6	6832610	A	C	ANN=C|missense_variant|MODERATE|Os06g0232100|Os06g0232100|transcript|Os06t0232100-01|protein_coding|1/6|c.141T>G|p.His47Gln|253/2664|141/1113|47/370||,C|upstream_gene_variant|MODIFIER|Os06g0232100|Os06g0232100|transcript|Os06t0232100-02|protein_coding||c.-2638T>G|||||2592|,C|upstream_gene_variant|MODIFIER|Os06g0232100|Os06g0232100|transcript|Os06t0232100-03|protein_coding||c.-2824T>G|||||2822|WAR…
6	6832717	C	T	ANN=T|missense_variant|MODERATE|Os06g0232100|Os06g0232100|transcript|Os06t0232100-01|protein_coding|1/6|c.34G>A|p.Asp12Asn|146/2664|34/1113|12/370||,T|upstream_gene_variant|MODIFIER|Os06g0232100|Os06g0232100|transcript|Os06t0232100-02|protein_coding||c.-2745G>A|||||2699|,T|upstream_gene_variant|MODIFIER|Os06g0232100|Os06g0232100|transcript|Os06t0232100-03|protein_coding||c.-2931G>A|||||2929|WARNI…
7	117506	C	A	ANN=A|missense_variant|MODERATE|Os07g0102000|Os07g0102000|transcript|Os07t0102000-01|protein_coding|1/3|c.233G>T|p.Trp78Leu|237/2026|233/636|78/211||WARNING_TRANSCRIPT_NO_START_CODON,A|upstream_gene_variant|MODIFIER|OsHAK22|Os07g0102100|transcript|Os07t0102100-02|protein_coding||c.-4872C>A|||||4786|,A|upstream_gene_variant|MODIFIER|OsHAK22|Os07g0102100|transcript|Os07t0102100-01|protein_coding||c…
7	125680	A	T	ANN=T|stop_gained|HIGH|OsHAK22|Os07g0102100|transcript|Os07t0102100-01|protein_coding|2/2|c.781A>T|p.Arg261*|904/3152|781/2034|261/677||,T|synonymous_variant|LOW|OsHAK22|Os07g0102100|transcript|Os07t0102100-02|protein_coding|2/3|c.786A>T|p.Thr262Thr|872/2916|786/2373|262/790||,T|downstream_gene_variant|MODIFIER|Os07g0102150|Os07g0102150|transcript|Os07t0102150-00|protein_coding||c.*616T>A|||||616…
7	126880	A	G	ANN=G|missense_variant|MODERATE|OsHAK22|Os07g0102100|transcript|Os07t0102100-01|protein_coding|2/2|c.1981A>G|p.Lys661Glu|2104/3152|1981/2034|661/677||,G|synonymous_variant|LOW|OsHAK22|Os07g0102100|transcript|Os07t0102100-02|protein_coding|2/3|c.1986A>G|p.Glu662Glu|2072/2916|1986/2373|662/790||,G|downstream_gene_variant|MODIFIER|OsSTA184|Os07g0102200|transcript|Os07t0102200-01|protein_coding||c.*1…
7	129502	C	T	ANN=T|missense_variant|MODERATE|OsSTA184|Os07g0102200|transcript|Os07t0102200-01|protein_coding|3/3|c.967G>A|p.Asp323Asn|1106/1895|967/1614|323/537||,T|upstream_gene_variant|MODIFIER|Os07g0102150|Os07g0102150|transcript|Os07t0102150-00|protein_coding||c.-2393G>A|||||2025|WARNING_TRANSCRIPT_NO_STOP_CODON,T|downstream_gene_variant|MODIFIER|OsHAK22|Os07g0102100|transcript|Os07t0102100-02|protein_cod…
7	129961	T	C	ANN=C|missense_variant|MODERATE|OsSTA184|Os07g0102200|transcript|Os07t0102200-01|protein_coding|3/3|c.508A>G|p.Met170Val|647/1895|508/1614|170/537||,C|upstream_gene_variant|MODIFIER|Os07g0102150|Os07g0102150|transcript|Os07t0102150-00|protein_coding||c.-2852A>G|||||2484|WARNING_TRANSCRIPT_NO_STOP_CODON,C|downstream_gene_variant|MODIFIER|OsHAK22|Os07g0102100|transcript|Os07t0102100-02|protein_codi…
7	155382	T	A	ANN=A|missense_variant|MODERATE|Os07g0102500|Os07g0102500|transcript|Os07t0102500-01|protein_coding|8/8|c.1054A>T|p.Met352Leu|1140/1616|1054/1317|352/438||
7	183203	C	T	ANN=T|missense_variant|MODERATE|Os07g0103000|Os07g0103000|transcript|Os07t0103000-01|protein_coding|1/2|c.41G>A|p.Arg14His|41/619|41/225|14/74||
7	193676	C	T	ANN=T|missense_variant|MODERATE|OsGLR3.6|Os07g0103100|transcript|Os07t0103100-01|protein_coding|2/3|c.464C>T|p.Ala155Val|979/3647|464/2871|155/956||,T|downstream_gene_variant|MODIFIER|Os07g0103200|Os07g0103200|transcript|Os07t0103200-01|protein_coding||c.*3203G>A|||||2839|
7	194803	G	T	ANN=T|missense_variant|MODERATE|OsGLR3.6|Os07g0103100|transcript|Os07t0103100-01|protein_coding|2/3|c.1591G>T|p.Gly531Trp|2106/3647|1591/2871|531/956||,T|downstream_gene_variant|MODIFIER|Os07g0103200|Os07g0103200|transcript|Os07t0103200-01|protein_coding||c.*2076C>A|||||1712|
7	199745	C	A	ANN=A|missense_variant|MODERATE|Os07g0103200|Os07g0103200|transcript|Os07t0103200-01|protein_coding|1/8|c.34G>T|p.Val12Leu|58/1297|34/909|12/302||,A|downstream_gene_variant|MODIFIER|OsGLR3.6|Os07g0103100|transcript|Os07t0103100-01|protein_coding||c.*3577C>A|||||3316|
7	218245	A	G	ANN=G|missense_variant|MODERATE|OsGA2ox5|Os07g0103500|transcript|Os07t0103500-01|protein_coding|2/2|c.32A>G|p.Asn11Ser|431/1729|32/1026|11/341||,G|missense_variant|MODERATE|Os07g0103600|Os07g0103600|transcript|Os07t0103600-01|protein_coding|1/1|c.896T>C|p.Val299Ala|1008/1077|896/930|299/309||
7	218487	G	A	ANN=A|missense_variant|MODERATE|OsGA2ox5|Os07g0103500|transcript|Os07t0103500-01|protein_coding|2/2|c.274G>A|p.Ala92Thr|673/1729|274/1026|92/341||,A|synonymous_variant|LOW|Os07g0103600|Os07g0103600|transcript|Os07t0103600-01|protein_coding|1/1|c.654C>T|p.Gly218Gly|766/1077|654/930|218/309||
7	240913	G	A	ANN=A|missense_variant|MODERATE|Os07g0104233|Os07g0104233|transcript|Os07t0104233-00|protein_coding|2/2|c.349G>A|p.Ala117Thr|349/381|349/381|117/126||WARNING_TRANSCRIPT_NO_START_CODON,A|downstream_gene_variant|MODIFIER|prx97|Os07g0104100|transcript|Os07t0104100-01|protein_coding||c.*3809G>A|||||3584|WARNING_TRANSCRIPT_NO_START_CODON
7	259825	T	C	ANN=C|missense_variant|MODERATE|prx95|Os07g0104500|transcript|Os07t0104500-01|protein_coding|1/3|c.38T>C|p.Val13Ala|114/1461|38/1086|13/361||,C|downstream_gene_variant|MODIFIER|Os07g0104750|Os07g0104750|transcript|Os07t0104750-00|protein_coding||c.*5016A>G|||||4703|WARNING_TRANSCRIPT_NO_START_CODON
7	262036	A	T	ANN=T|missense_variant|MODERATE|prx95|Os07g0104500|transcript|Os07t0104500-01|protein_coding|3/3|c.679A>T|p.Thr227Ser|755/1461|679/1086|227/361||,T|downstream_gene_variant|MODIFIER|Os07g0104750|Os07g0104750|transcript|Os07t0104750-00|protein_coding||c.*2805T>A|||||2492|WARNING_TRANSCRIPT_NO_START_CODON
7	300482	C	T	ANN=T|missense_variant|MODERATE|Os07g0105200|Os07g0105200|transcript|Os07t0105200-01|protein_coding|1/3|c.737C>T|p.Thr246Met|779/1479|737/1251|246/416||,T|downstream_gene_variant|MODIFIER|Os07g0105300|Os07g0105300|transcript|Os07t0105300-01|protein_coding||c.*2399G>A|||||2143|,T|downstream_gene_variant|MODIFIER|Os07g0105300|Os07g0105300|transcript|Os07t0105300-02|protein_coding||c.*2215G>A|||||17…
7	301151	C	T	ANN=T|missense_variant|MODERATE|Os07g0105200|Os07g0105200|transcript|Os07t0105200-01|protein_coding|3/3|c.1163C>T|p.Ser388Phe|1205/1479|1163/1251|388/416||,T|upstream_gene_variant|MODIFIER|Os07g0105600|Os07g0105600|transcript|Os07t0105600-01|protein_coding||c.-4932C>T|||||4903|,T|downstream_gene_variant|MODIFIER|Os07g0105300|Os07g0105300|transcript|Os07t0105300-01|protein_coding||c.*1730G>A|||||1…
7	306873	G	A	ANN=A|missense_variant|MODERATE|Os07g0105600|Os07g0105600|transcript|Os07t0105600-01|protein_coding|2/2|c.655G>A|p.Ala219Thr|684/779|655/669|219/222||,A|upstream_gene_variant|MODIFIER|Os07g0105300|Os07g0105300|transcript|Os07t0105300-01|protein_coding||c.-3507C>T|||||3245|,A|upstream_gene_variant|MODIFIER|Os07g0105750|Os07g0105750|transcript|Os07t0105750-00|pseudogene||n.-509G>A|||||509|,A|upstre…
7	309833	G	A	ANN=A|missense_variant|MODERATE|OsDLK|Os07g0105700|transcript|Os07t0105700-01|protein_coding|6/16|c.1007C>T|p.Thr336Ile|1007/2641|1007/2295|336/764||,A|downstream_gene_variant|MODIFIER|Os07g0105600|Os07g0105600|transcript|Os07t0105600-01|protein_coding||c.*2946G>A|||||2865|,A|non_coding_transcript_exon_variant|MODIFIER|Os07g0105750|Os07g0105750|transcript|Os07t0105750-00|pseudogene|11/15|n.1281G>…
7	5975618	C	T	ANN=T|missense_variant|MODERATE|OsEXO70FX10|Os07g0210000|transcript|Os07t0210000-01|protein_coding|5/5|c.1223C>T|p.Thr408Met|1257/2257|1223/2103|408/700||,T|missense_variant|MODERATE|OsEXO70FX10|Os07g0210000|transcript|Os07t0210000-02|protein_coding|6/6|c.1139C>T|p.Thr380Met|1140/2140|1139/2019|380/672||WARNING_TRANSCRIPT_NO_START_CODON,T|downstream_gene_variant|MODIFIER|OsEXO70X4|Os07g0210100|tr…
7	5975987	C	T	ANN=T|missense_variant|MODERATE|OsEXO70FX10|Os07g0210000|transcript|Os07t0210000-01|protein_coding|5/5|c.1592C>T|p.Pro531Leu|1626/2257|1592/2103|531/700||,T|missense_variant|MODERATE|OsEXO70FX10|Os07g0210000|transcript|Os07t0210000-02|protein_coding|6/6|c.1508C>T|p.Pro503Leu|1509/2140|1508/2019|503/672||WARNING_TRANSCRIPT_NO_START_CODON,T|downstream_gene_variant|MODIFIER|OsEXO70X4|Os07g0210100|tr…
7	6018991	T	G	ANN=G|missense_variant|MODERATE|OsEXO70X3|Os07g0211000|transcript|Os07t0211000-00|protein_coding|1/1|c.1205A>C|p.Tyr402Ser|1662/2970|1205/1209|402/402||WARNING_TRANSCRIPT_NO_START_CODON
7	6019711	A	G	ANN=G|missense_variant|MODERATE|OsEXO70X3|Os07g0211000|transcript|Os07t0211000-00|protein_coding|1/1|c.485T>C|p.Val162Ala|942/2970|485/1209|162/402||WARNING_TRANSCRIPT_NO_START_CODON
7	6019741	A	G	ANN=G|missense_variant|MODERATE|OsEXO70X3|Os07g0211000|transcript|Os07t0211000-00|protein_coding|1/1|c.455T>C|p.Val152Ala|912/2970|455/1209|152/402||WARNING_TRANSCRIPT_NO_START_CODON
7	6019921	C	T	ANN=T|missense_variant|MODERATE|OsEXO70X3|Os07g0211000|transcript|Os07t0211000-00|protein_coding|1/1|c.275G>A|p.Arg92Gln|732/2970|275/1209|92/402||WARNING_TRANSCRIPT_NO_START_CODON
7	6019987	C	T	ANN=T|missense_variant|MODERATE|OsEXO70X3|Os07g0211000|transcript|Os07t0211000-00|protein_coding|1/1|c.209G>A|p.Gly70Glu|666/2970|209/1209|70/402||WARNING_TRANSCRIPT_NO_START_CODON
7	6020005	A	T	ANN=T|missense_variant|MODERATE|OsEXO70X3|Os07g0211000|transcript|Os07t0211000-00|protein_coding|1/1|c.191T>A|p.Ile64Asn|648/2970|191/1209|64/402||WARNING_TRANSCRIPT_NO_START_CODON
7	6020132	A	C	ANN=C|missense_variant|MODERATE|OsEXO70X3|Os07g0211000|transcript|Os07t0211000-00|protein_coding|1/1|c.64T>G|p.Ser22Ala|521/2970|64/1209|22/402||WARNING_TRANSCRIPT_NO_START_CODON
7	6055422	T	G	ANN=G|missense_variant|MODERATE|OsKAPP|Os07g0211400|transcript|Os07t0211400-01|protein_coding|5/13|c.637T>G|p.Ser213Ala|762/1948|637/1629|213/542||
7	6067391	A	G	ANN=G|missense_variant|MODERATE|Rc|Os07g0211500|transcript|Os07t0211500-01|protein_coding|5/7|c.897A>G|p.Ile299Met|897/1987|897/1422|299/473||
7	6068017	C	A	ANN=A|stop_gained|HIGH|Rc|Os07g0211500|transcript|Os07t0211500-01|protein_coding|6/7|c.1353C>A|p.Cys451*|1353/1987|1353/1422|451/473||
7	7200711	A	T	ANN=T|missense_variant|MODERATE|OsFbox354|Os07g0229100|transcript|Os07t0229100-01|protein_coding|1/3|c.1088T>A|p.Val363Asp|1202/2119|1088/1716|363/571||
7	7233904	T	C	ANN=C|missense_variant|MODERATE|Os07g0229900|Os07g0229900|transcript|Os07t0229900-02|protein_coding|1/1|c.356A>G|p.Asn119Ser|1284/2012|356/498|119/165||,C|missense_variant|MODERATE|Os07g0229900|Os07g0229900|transcript|Os07t0229900-01|protein_coding|3/5|c.239A>G|p.Asn80Ser|358/751|239/417|80/138||,C|upstream_gene_variant|MODIFIER|Os07g0229800|Os07g0229800|transcript|Os07t0229800-01|protein_coding|…
7	10924208	C	T	ANN=T|missense_variant|MODERATE|Os07g0284700|Os07g0284700|transcript|Os07t0284700-00|protein_coding|1/1|c.94C>T|p.Arg32Cys|94/847|94/843|32/280||
7	22102720	G	A	ANN=A|stop_gained|HIGH|OsFbox393|Os07g0554900|transcript|Os07t0554900-01|protein_coding|1/2|c.780G>A|p.Trp260*|804/2012|780/1287|260/428||,A|5_prime_UTR_variant|MODIFIER|Os07g0554850|Os07g0554850|transcript|Os07t0554850-00|protein_coding|1/1|c.-19C>T|||||19|,A|upstream_gene_variant|MODIFIER|OsFbox394|Os07g0555000|transcript|Os07t0555000-01|protein_coding||c.-4970G>A|||||4969|WARNING_TRANSCRIPT_NO…
7	22103019	A	T	ANN=T|missense_variant|MODERATE|OsFbox393|Os07g0554900|transcript|Os07t0554900-01|protein_coding|1/2|c.1079A>T|p.Lys360Met|1103/2012|1079/1287|360/428||,T|upstream_gene_variant|MODIFIER|Os07g0554850|Os07g0554850|transcript|Os07t0554850-00|protein_coding||c.-318T>A|||||179|,T|upstream_gene_variant|MODIFIER|OsFbox394|Os07g0555000|transcript|Os07t0555000-01|protein_coding||c.-4671A>T|||||4670|WARNIN…
7	22111048	C	T	ANN=T|missense_variant|MODERATE|Os07g0555100|Os07g0555100|transcript|Os07t0555100-01|protein_coding|1/2|c.161C>T|p.Ala54Val|223/1538|161/1209|54/402||,T|upstream_gene_variant|MODIFIER|Os07g0555050|Os07g0555050|transcript|Os07t0555050-00|protein_coding||c.-2841G>A|||||2339|WARNING_TRANSCRIPT_INCOMPLETE,T|upstream_gene_variant|MODIFIER|eIF4Gtsv1|Os07g0555200|transcript|Os07t0555200-01|protein_codin…
7	22111978	C	T	ANN=T|missense_variant|MODERATE|Os07g0555100|Os07g0555100|transcript|Os07t0555100-01|protein_coding|1/2|c.1091C>T|p.Ser364Leu|1153/1538|1091/1209|364/402||,T|upstream_gene_variant|MODIFIER|Os07g0555050|Os07g0555050|transcript|Os07t0555050-00|protein_coding||c.-3771G>A|||||3269|WARNING_TRANSCRIPT_INCOMPLETE,T|upstream_gene_variant|MODIFIER|eIF4Gtsv1|Os07g0555200|transcript|Os07t0555200-01|protein_…
7	22115604	C	T	ANN=T|missense_variant|MODERATE|eIF4Gtsv1|Os07g0555200|transcript|Os07t0555200-01|protein_coding|3/9|c.197C>T|p.Ala66Val|372/4064|197/3889|66/1295||WARNING_TRANSCRIPT_INCOMPLETE,T|upstream_gene_variant|MODIFIER|eIF4Gtsv1|Os07g0555200|transcript|Os07t0555200-02|protein_coding||c.-3499C>T|||||3497|WARNING_TRANSCRIPT_NO_START_CODON,T|upstream_gene_variant|MODIFIER|eIF4Gtsv1|Os07g0555200|transcript|O…
7	22115903	C	A	ANN=A|missense_variant|MODERATE|eIF4Gtsv1|Os07g0555200|transcript|Os07t0555200-01|protein_coding|4/9|c.386C>A|p.Ala129Asp|561/4064|386/3889|129/1295||WARNING_TRANSCRIPT_INCOMPLETE,A|upstream_gene_variant|MODIFIER|eIF4Gtsv1|Os07g0555200|transcript|Os07t0555200-02|protein_coding||c.-3200C>A|||||3198|WARNING_TRANSCRIPT_NO_START_CODON,A|upstream_gene_variant|MODIFIER|eIF4Gtsv1|Os07g0555200|transcript…
7	22117749	C	T	ANN=T|missense_variant|MODERATE|eIF4Gtsv1|Os07g0555200|transcript|Os07t0555200-01|protein_coding|7/9|c.1741C>T|p.Pro581Ser|1916/4064|1741/3889|581/1295||WARNING_TRANSCRIPT_INCOMPLETE,T|upstream_gene_variant|MODIFIER|eIF4Gtsv1|Os07g0555200|transcript|Os07t0555200-02|protein_coding||c.-1354C>T|||||1352|WARNING_TRANSCRIPT_NO_START_CODON,T|upstream_gene_variant|MODIFIER|eIF4Gtsv1|Os07g0555200|transcr…
7	22118606	C	T	ANN=T|missense_variant|MODERATE|eIF4Gtsv1|Os07g0555200|transcript|Os07t0555200-01|protein_coding|9/9|c.2435C>T|p.Ser812Leu|2610/4064|2435/3889|812/1295||WARNING_TRANSCRIPT_INCOMPLETE,T|upstream_gene_variant|MODIFIER|eIF4Gtsv1|Os07g0555200|transcript|Os07t0555200-02|protein_coding||c.-497C>T|||||495|WARNING_TRANSCRIPT_NO_START_CODON,T|upstream_gene_variant|MODIFIER|eIF4Gtsv1|Os07g0555200|transcrip…
7	22119338	G	T	ANN=T|missense_variant|MODERATE|eIF4Gtsv1|Os07g0555200|transcript|Os07t0555200-01|protein_coding|9/9|c.3167G>T|p.Gly1056Val|3342/4064|3167/3889|1056/1295||WARNING_TRANSCRIPT_INCOMPLETE,T|missense_variant|MODERATE|eIF4Gtsv1|Os07g0555200|transcript|Os07t0555200-02|protein_coding|1/4|c.236G>T|p.Gly79Val|238/2942|236/2448|79/815||WARNING_TRANSCRIPT_NO_START_CODON,T|upstream_gene_variant|MODIFIER|eIF4…
7	22119568	G	A	ANN=A|missense_variant|MODERATE|eIF4Gtsv1|Os07g0555200|transcript|Os07t0555200-01|protein_coding|9/9|c.3397G>A|p.Val1133Ile|3572/4064|3397/3889|1133/1295||WARNING_TRANSCRIPT_INCOMPLETE,A|missense_variant|MODERATE|eIF4Gtsv1|Os07g0555200|transcript|Os07t0555200-02|protein_coding|1/4|c.466G>A|p.Val156Ile|468/2942|466/2448|156/815||WARNING_TRANSCRIPT_NO_START_CODON,A|upstream_gene_variant|MODIFIER|eI…
7	24403513	G	C	ANN=C|missense_variant|MODERATE|Os07g0598300|Os07g0598300|transcript|Os07t0598300-02|protein_coding|1/24|c.123G>C|p.Lys41Asn|147/3680|123/3489|41/1162||,C|missense_variant|MODERATE|Os07g0598300|Os07g0598300|transcript|Os07t0598300-01|protein_coding|1/4|c.123G>C|p.Lys41Asn|164/1228|123/1086|41/361||,C|missense_variant|MODERATE|Os07g0598300|Os07g0598300|transcript|Os07t0598300-03|protein_coding|1/2…
7	24405426	G	T	ANN=T|missense_variant|MODERATE|Os07g0598300|Os07g0598300|transcript|Os07t0598300-02|protein_coding|3/24|c.745G>T|p.Ala249Ser|769/3680|745/3489|249/1162||,T|missense_variant|MODERATE|Os07g0598300|Os07g0598300|transcript|Os07t0598300-01|protein_coding|3/4|c.745G>T|p.Ala249Ser|786/1228|745/1086|249/361||,T|missense_variant|MODERATE|Os07g0598300|Os07g0598300|transcript|Os07t0598300-03|protein_coding…
7	24407872	G	T	ANN=T|missense_variant|MODERATE|Os07g0598300|Os07g0598300|transcript|Os07t0598300-02|protein_coding|7/24|c.1183G>T|p.Gly395Trp|1207/3680|1183/3489|395/1162||,T|missense_variant|MODERATE|Os07g0598300|Os07g0598300|transcript|Os07t0598300-03|protein_coding|7/25|c.1159G>T|p.Gly387Trp|1160/3900|1159/3477|387/1158||WARNING_TRANSCRIPT_NO_START_CODON,T|downstream_gene_variant|MODIFIER|Os07g0598300|Os07g0…
7	24408910	T	A	ANN=A|missense_variant|MODERATE|Os07g0598300|Os07g0598300|transcript|Os07t0598300-02|protein_coding|9/24|c.1318T>A|p.Trp440Arg|1342/3680|1318/3489|440/1162||,A|missense_variant|MODERATE|Os07g0598300|Os07g0598300|transcript|Os07t0598300-03|protein_coding|9/25|c.1294T>A|p.Trp432Arg|1295/3900|1294/3477|432/1158||WARNING_TRANSCRIPT_NO_START_CODON,A|downstream_gene_variant|MODIFIER|Os07g0598300|Os07g0…
7	24408967	A	C	ANN=C|missense_variant|MODERATE|Os07g0598300|Os07g0598300|transcript|Os07t0598300-02|protein_coding|9/24|c.1375A>C|p.Asn459His|1399/3680|1375/3489|459/1162||,C|missense_variant|MODERATE|Os07g0598300|Os07g0598300|transcript|Os07t0598300-03|protein_coding|9/25|c.1351A>C|p.Asn451His|1352/3900|1351/3477|451/1158||WARNING_TRANSCRIPT_NO_START_CODON,C|downstream_gene_variant|MODIFIER|Os07g0598300|Os07g0…
7	24413217	C	T	ANN=T|missense_variant|MODERATE|Os07g0598300|Os07g0598300|transcript|Os07t0598300-02|protein_coding|17/24|c.2254C>T|p.His752Tyr|2278/3680|2254/3489|752/1162||,T|missense_variant|MODERATE|Os07g0598300|Os07g0598300|transcript|Os07t0598300-03|protein_coding|17/25|c.2230C>T|p.His744Tyr|2231/3900|2230/3477|744/1158||WARNING_TRANSCRIPT_NO_START_CODON,T|upstream_gene_variant|MODIFIER|Os07g0598450|Os07g0…
7	24413754	A	G	ANN=G|missense_variant|MODERATE|Os07g0598300|Os07g0598300|transcript|Os07t0598300-02|protein_coding|19/24|c.2587A>G|p.Thr863Ala|2611/3680|2587/3489|863/1162||,G|missense_variant|MODERATE|Os07g0598300|Os07g0598300|transcript|Os07t0598300-03|protein_coding|19/25|c.2563A>G|p.Thr855Ala|2564/3900|2563/3477|855/1158||WARNING_TRANSCRIPT_NO_START_CODON,G|upstream_gene_variant|MODIFIER|Os07g0598450|Os07g0…
7	24417845	G	A	ANN=A|missense_variant|MODERATE|Os07g0598400|Os07g0598400|transcript|Os07t0598400-01|protein_coding|4/4|c.1277C>T|p.Pro426Leu|1320/1782|1277/1590|426/529||,A|upstream_gene_variant|MODIFIER|Os07g0598450|Os07g0598450|transcript|Os07t0598450-00|protein_coding||c.-281G>A|||||279|WARNING_TRANSCRIPT_NO_START_CODON,A|downstream_gene_variant|MODIFIER|Os07g0598300|Os07g0598300|transcript|Os07t0598300-02|p…
7	24432079	C	A	ANN=A|missense_variant|MODERATE|Os07g0598700|Os07g0598700|transcript|Os07t0598700-00|protein_coding|1/6|c.136G>T|p.Gly46Cys|136/1473|136/1350|46/449||
7	24439957	G	A	ANN=A|missense_variant|MODERATE|Os07g0598800|Os07g0598800|transcript|Os07t0598800-00|protein_coding|2/2|c.1100G>A|p.Arg367His|1361/1879|1100/1266|367/421||
7	24449103	A	G	ANN=G|missense_variant|MODERATE|Os07g0598900|Os07g0598900|transcript|Os07t0598900-01|protein_coding|6/10|c.788A>G|p.His263Arg|844/1536|788/1095|263/364||,G|3_prime_UTR_variant|MODIFIER|Os07g0598900|Os07g0598900|transcript|Os07t0598900-02|protein_coding|5/7|c.*496A>G|||||496|,G|upstream_gene_variant|MODIFIER|Os07g0599000|Os07g0599000|transcript|Os07t0599000-01|protein_coding||c.-2599A>G|||||2531|
7	24452300	C	T	ANN=T|missense_variant|MODERATE|Os07g0599000|Os07g0599000|transcript|Os07t0599000-01|protein_coding|1/7|c.599C>T|p.Ala200Val|667/2280|599/1872|200/623||,T|upstream_gene_variant|MODIFIER|Os07g0599150|Os07g0599150|transcript|Os07t0599150-00|protein_coding||c.-6332C>T|||||4710|WARNING_TRANSCRIPT_INCOMPLETE,T|downstream_gene_variant|MODIFIER|Os07g0598900|Os07g0598900|transcript|Os07t0598900-01|protei…
7	24457629	C	T	ANN=T|missense_variant|MODERATE|Os07g0599100|Os07g0599100|transcript|Os07t0599100-00|protein_coding|2/2|c.1447G>A|p.Val483Ile|1454/2953|1447/2946|483/981||,T|5_prime_UTR_variant|MODIFIER|Os07g0599150|Os07g0599150|transcript|Os07t0599150-00|protein_coding|1/3|c.-1003C>T|||||1925|WARNING_TRANSCRIPT_INCOMPLETE,T|downstream_gene_variant|MODIFIER|Os07g0599000|Os07g0599000|transcript|Os07t0599000-01|pr…
7	24457825	G	T	ANN=T|missense_variant|MODERATE|Os07g0599100|Os07g0599100|transcript|Os07t0599100-00|protein_coding|2/2|c.1251C>A|p.His417Gln|1258/2953|1251/2946|417/981||,T|5_prime_UTR_premature_start_codon_gain_variant|LOW|Os07g0599150|Os07g0599150|transcript|Os07t0599150-00|protein_coding|1/3|c.-807G>T||||||WARNING_TRANSCRIPT_INCOMPLETE,T|5_prime_UTR_variant|MODIFIER|Os07g0599150|Os07g0599150|transcript|Os07t…
7	24457914	C	T	ANN=T|missense_variant|MODERATE|Os07g0599100|Os07g0599100|transcript|Os07t0599100-00|protein_coding|2/2|c.1162G>A|p.Asp388Asn|1169/2953|1162/2946|388/981||,T|5_prime_UTR_variant|MODIFIER|Os07g0599150|Os07g0599150|transcript|Os07t0599150-00|protein_coding|1/3|c.-718C>T|||||1640|WARNING_TRANSCRIPT_INCOMPLETE,T|downstream_gene_variant|MODIFIER|Os07g0599000|Os07g0599000|transcript|Os07t0599000-01|pro…
7	24461067	T	C	ANN=C|missense_variant|MODERATE|Os07g0599201|Os07g0599201|transcript|Os07t0599201-00|protein_coding|1/1|c.1370A>G|p.Lys457Arg|1370/1575|1370/1545|457/514||,C|upstream_gene_variant|MODIFIER|Os07g0599100|Os07g0599100|transcript|Os07t0599100-00|protein_coding||c.-1157A>G|||||1150|,C|downstream_gene_variant|MODIFIER|Os07g0599150|Os07g0599150|transcript|Os07t0599150-00|protein_coding||c.*1164T>C|||||1…
7	24461544	G	A	ANN=A|missense_variant|MODERATE|Os07g0599201|Os07g0599201|transcript|Os07t0599201-00|protein_coding|1/1|c.893C>T|p.Ala298Val|893/1575|893/1545|298/514||,A|upstream_gene_variant|MODIFIER|Os07g0599100|Os07g0599100|transcript|Os07t0599100-00|protein_coding||c.-1634C>T|||||1627|,A|downstream_gene_variant|MODIFIER|Os07g0599150|Os07g0599150|transcript|Os07t0599150-00|protein_coding||c.*1641G>A|||||1641…
7	24461874	T	G	ANN=G|missense_variant|MODERATE|Os07g0599201|Os07g0599201|transcript|Os07t0599201-00|protein_coding|1/1|c.563A>C|p.Asn188Thr|563/1575|563/1545|188/514||,G|upstream_gene_variant|MODIFIER|Os07g0599100|Os07g0599100|transcript|Os07t0599100-00|protein_coding||c.-1964A>C|||||1957|,G|downstream_gene_variant|MODIFIER|Os07g0599150|Os07g0599150|transcript|Os07t0599150-00|protein_coding||c.*1971T>G|||||1971…
7	25219940	G	C	ANN=C|missense_variant|MODERATE|Os07g0612500|Os07g0612500|transcript|Os07t0612500-00|protein_coding|2/2|c.847C>G|p.Pro283Ala|847/1278|847/1278|283/425||,C|upstream_gene_variant|MODIFIER|Os07g0612400|Os07g0612400|transcript|Os07t0612400-01|protein_coding||c.-3352C>G|||||3320|
7	25220087	C	T	ANN=T|missense_variant|MODERATE|Os07g0612500|Os07g0612500|transcript|Os07t0612500-00|protein_coding|2/2|c.700G>A|p.Val234Ile|700/1278|700/1278|234/425||,T|upstream_gene_variant|MODIFIER|Os07g0612400|Os07g0612400|transcript|Os07t0612400-01|protein_coding||c.-3499G>A|||||3467|
7	25220150	G	C	ANN=C|missense_variant|MODERATE|Os07g0612500|Os07g0612500|transcript|Os07t0612500-00|protein_coding|2/2|c.637C>G|p.Gln213Glu|637/1278|637/1278|213/425||,C|upstream_gene_variant|MODIFIER|Os07g0612400|Os07g0612400|transcript|Os07t0612400-01|protein_coding||c.-3562C>G|||||3530|
7	25220261	T	C	ANN=C|missense_variant|MODERATE|Os07g0612500|Os07g0612500|transcript|Os07t0612500-00|protein_coding|2/2|c.526A>G|p.Asn176Asp|526/1278|526/1278|176/425||,C|upstream_gene_variant|MODIFIER|Os07g0612400|Os07g0612400|transcript|Os07t0612400-01|protein_coding||c.-3673A>G|||||3641|
7	25237091	G	A	ANN=A|missense_variant|MODERATE|Os07g0613200|Os07g0613200|transcript|Os07t0613200-00|protein_coding|1/1|c.305C>T|p.Thr102Met|363/741|305/441|102/146||,A|upstream_gene_variant|MODIFIER|Os07g0613300|Os07g0613300|transcript|Os07t0613300-01|protein_coding||c.-2822G>A|||||2675|,A|upstream_gene_variant|MODIFIER|Os07g0613300|Os07g0613300|transcript|Os07t0613300-02|protein_coding||c.-2822G>A|||||2767|
7	25241078	G	T	ANN=T|missense_variant|MODERATE|Os07g0613300|Os07g0613300|transcript|Os07t0613300-01|protein_coding|1/15|c.1166G>T|p.Gly389Val|1313/3581|1166/2943|389/980||,T|missense_variant|MODERATE|Os07g0613300|Os07g0613300|transcript|Os07t0613300-02|protein_coding|1/15|c.1166G>T|p.Gly389Val|1221/3489|1166/2943|389/980||,T|upstream_gene_variant|MODIFIER|Os07g0613200|Os07g0613200|transcript|Os07t0613200-00|pro…
8	4702027	C	T	ANN=T|missense_variant|MODERATE|BRHIS1|Os08g0180300|transcript|Os08t0180300-01|protein_coding|2/11|c.212C>T|p.Ala71Val|662/3843|212/3093|71/1030||,T|missense_variant|MODERATE|BRHIS1|Os08g0180300|transcript|Os08t0180300-02|protein_coding|1/5|c.278C>T|p.Ala93Val|1002/2356|278/1632|93/543||WARNING_TRANSCRIPT_NO_START_CODON,T|missense_variant|MODERATE|BRHIS1|Os08g0180300|transcript|Os08t0180300-03|pr…
8	4716366	C	T	ANN=T|missense_variant|MODERATE|Os08g0180500|Os08g0180500|transcript|Os08t0180500-00|protein_coding|2/3|c.1648C>T|p.Pro550Ser|1648/2520|1648/2412|550/803||WARNING_TRANSCRIPT_NO_START_CODON,T|downstream_gene_variant|MODIFIER|Os08g0180950|Os08g0180950|transcript|Os08t0180950-00|protein_coding||c.*2370G>A|||||2370|
8	20669014	A	C	ANN=C|missense_variant|MODERATE|Os08g0428900|Os08g0428900|transcript|Os08t0428900-01|protein_coding|8/11|c.2811T>G|p.Asn937Lys|3160/5569|2811/4893|937/1630||
8	20761447	A	T	ANN=T|missense_variant|MODERATE|CYP735A3|Os08g0429800|transcript|Os08t0429800-00|protein_coding|3/3|c.1939T>A|p.Leu647Ile|1939/2004|1939/2004|647/667||,T|downstream_gene_variant|MODIFIER|Os08g0429901|Os08g0429901|transcript|Os08t0429901-00|pseudogene||n.*4254T>A|||||4254|
8	20763003	T	G	ANN=G|missense_variant|MODERATE|CYP735A3|Os08g0429800|transcript|Os08t0429800-00|protein_coding|2/3|c.932A>C|p.Glu311Ala|932/2004|932/2004|311/667||,G|downstream_gene_variant|MODIFIER|Os08g0429901|Os08g0429901|transcript|Os08t0429901-00|pseudogene||n.*2698A>C|||||2698|
8	20763355	G	A	ANN=A|missense_variant|MODERATE|CYP735A3|Os08g0429800|transcript|Os08t0429800-00|protein_coding|1/3|c.664C>T|p.Arg222Cys|664/2004|664/2004|222/667||,A|downstream_gene_variant|MODIFIER|Os08g0429901|Os08g0429901|transcript|Os08t0429901-00|pseudogene||n.*2346C>T|||||2346|
8	20793641	A	T	ANN=T|missense_variant|MODERATE|Os08g0430100|Os08g0430100|transcript|Os08t0430100-01|protein_coding|2/4|c.446A>T|p.Gln149Leu|770/1447|446/807|149/268||,T|upstream_gene_variant|MODIFIER|RAD23|Os08g0430200|transcript|Os08t0430200-01|protein_coding||c.-3443A>T|||||3380|
8	20812927	A	C	ANN=C|missense_variant|MODERATE|GF14C|Os08g0430500|transcript|Os08t0430500-01|protein_coding|6/6|c.757T>G|p.Cys253Gly|848/1189|757/771|253/256||,C|missense_variant|MODERATE|GF14C|Os08g0430500|transcript|Os08t0430500-03|protein_coding|5/5|c.661T>G|p.Cys221Gly|662/1086|661/675|221/224||WARNING_TRANSCRIPT_NO_START_CODON,C|missense_variant|MODERATE|GF14C|Os08g0430500|transcript|Os08t0430500-02|protei…
8	20851204	T	C	ANN=C|missense_variant|MODERATE|Os08g0431100|Os08g0431100|transcript|Os08t0431100-01|protein_coding|4/6|c.959T>C|p.Leu320Ser|1059/2584|959/2055|320/684||,C|missense_variant|MODERATE|Os08g0431100|Os08g0431100|transcript|Os08t0431100-02|protein_coding|4/6|c.695T>C|p.Leu232Ser|697/2240|695/1791|232/596||WARNING_TRANSCRIPT_NO_START_CODON,C|upstream_gene_variant|MODIFIER|OsFH9|Os08g0431200|transcript|…
8	20852154	C	T	ANN=T|missense_variant|MODERATE|Os08g0431100|Os08g0431100|transcript|Os08t0431100-01|protein_coding|6/6|c.1715C>T|p.Pro572Leu|1815/2584|1715/2055|572/684||,T|missense_variant|MODERATE|Os08g0431100|Os08g0431100|transcript|Os08t0431100-02|protein_coding|6/6|c.1451C>T|p.Pro484Leu|1453/2240|1451/1791|484/596||WARNING_TRANSCRIPT_NO_START_CODON,T|missense_variant|MODERATE|Os08g0431100|Os08g0431100|tran…
8	20852429	G	A	ANN=A|missense_variant|MODERATE|Os08g0431100|Os08g0431100|transcript|Os08t0431100-01|protein_coding|6/6|c.1990G>A|p.Glu664Lys|2090/2584|1990/2055|664/684||,A|missense_variant|MODERATE|Os08g0431100|Os08g0431100|transcript|Os08t0431100-02|protein_coding|6/6|c.1726G>A|p.Glu576Lys|1728/2240|1726/1791|576/596||WARNING_TRANSCRIPT_NO_START_CODON,A|missense_variant|MODERATE|Os08g0431100|Os08g0431100|tran…
8	20855851	G	A	ANN=A|missense_variant|MODERATE|OsFH9|Os08g0431200|transcript|Os08t0431200-00|protein_coding|2/4|c.74G>A|p.Arg25His|89/2480|74/1563|25/520||WARNING_TRANSCRIPT_NO_START_CODON,A|downstream_gene_variant|MODIFIER|Os08g0431100|Os08g0431100|transcript|Os08t0431100-01|protein_coding||c.*3357G>A|||||2928|,A|downstream_gene_variant|MODIFIER|Os08g0431300|Os08g0431300|transcript|Os08t0431300-01|protein_codi…
8	20857380	A	G	ANN=G|missense_variant|MODERATE|OsFH9|Os08g0431200|transcript|Os08t0431200-00|protein_coding|4/4|c.1430A>G|p.Asp477Gly|1445/2480|1430/1563|477/520||WARNING_TRANSCRIPT_NO_START_CODON,G|downstream_gene_variant|MODIFIER|Os08g0431100|Os08g0431100|transcript|Os08t0431100-01|protein_coding||c.*4886A>G|||||4457|,G|downstream_gene_variant|MODIFIER|Os08g0431300|Os08g0431300|transcript|Os08t0431300-01|prot…
12	2573060	A	T	ANN=T|missense_variant|MODERATE|Os12g0152100|Os12g0152100|transcript|Os12t0152100-01|protein_coding|3/4|c.617A>T|p.Gln206Leu|674/1186|617/1032|206/343||,T|downstream_gene_variant|MODIFIER|Os12g0151900|Os12g0151900|transcript|Os12t0151900-01|protein_coding||c.*3930A>T|||||3412|,T|downstream_gene_variant|MODIFIER|OsFbox642|Os12g0152200|transcript|Os12t0152200-00|protein_coding||c.*1265T>A|||||1265|
12	2589296	C	A	ANN=A|stop_gained|HIGH|Os12g0152500|Os12g0152500|transcript|Os12t0152500-00|protein_coding|3/4|c.471C>A|p.Cys157*|803/1247|471/480|157/159||WARNING_TRANSCRIPT_NO_START_CODON,A|downstream_gene_variant|MODIFIER|Os12g0152600|Os12g0152600|transcript|Os12t0152600-01|protein_coding||c.*3343G>T|||||3256|
12	2593471	G	A	ANN=A|missense_variant|MODERATE|Os12g0152600|Os12g0152600|transcript|Os12t0152600-01|protein_coding|1/1|c.1319C>T|p.Pro440Leu|1428/2347|1319/2151|440/716||,A|downstream_gene_variant|MODIFIER|Os12g0152500|Os12g0152500|transcript|Os12t0152500-00|protein_coding||c.*3933G>A|||||3498|WARNING_TRANSCRIPT_NO_START_CODON,A|downstream_gene_variant|MODIFIER|Os12g0152700|Os12g0152700|transcript|Os12t0152700-…
12	2594278	G	T	ANN=T|missense_variant|MODERATE|Os12g0152600|Os12g0152600|transcript|Os12t0152600-01|protein_coding|1/1|c.512C>A|p.Pro171His|621/2347|512/2151|171/716||,T|downstream_gene_variant|MODIFIER|Os12g0152500|Os12g0152500|transcript|Os12t0152500-00|protein_coding||c.*4740G>T|||||4305|WARNING_TRANSCRIPT_NO_START_CODON,T|downstream_gene_variant|MODIFIER|Os12g0152700|Os12g0152700|transcript|Os12t0152700-01|…
12	2638051	G	A	ANN=A|missense_variant|MODERATE|Os12g0153433|Os12g0153433|transcript|Os12t0153433-00|protein_coding|1/1|c.325G>A|p.Asp109Asn|444/665|325/417|109/138||,A|downstream_gene_variant|MODIFIER|OsFbox643|Os12g0153400|transcript|Os12t0153400-00|protein_coding||c.*1164G>A|||||1164|
12	2650739	T	C	ANN=C|missense_variant|MODERATE|Os12g0153700|Os12g0153700|transcript|Os12t0153700-00|protein_coding|1/1|c.1031A>G|p.Gln344Arg|1031/1119|1031/1119|344/372||,C|downstream_gene_variant|MODIFIER|Os12g0153600|Os12g0153600|transcript|Os12t0153600-00|protein_coding||c.*377T>C|||||377|
12	2651274	A	G	ANN=G|missense_variant|MODERATE|Os12g0153700|Os12g0153700|transcript|Os12t0153700-00|protein_coding|1/1|c.496T>C|p.Tyr166His|496/1119|496/1119|166/372||,G|downstream_gene_variant|MODIFIER|Os12g0153600|Os12g0153600|transcript|Os12t0153600-00|protein_coding||c.*912A>G|||||912|
12	2651402	C	T	ANN=T|missense_variant|MODERATE|Os12g0153700|Os12g0153700|transcript|Os12t0153700-00|protein_coding|1/1|c.368G>A|p.Gly123Glu|368/1119|368/1119|123/372||,T|downstream_gene_variant|MODIFIER|Os12g0153600|Os12g0153600|transcript|Os12t0153600-00|protein_coding||c.*1040C>T|||||1040|
12	2660240	C	T	ANN=T|missense_variant|MODERATE|Os12g0153900|Os12g0153900|transcript|Os12t0153900-00|protein_coding|1/1|c.746C>T|p.Ala249Val|746/996|746/765|249/254||,T|downstream_gene_variant|MODIFIER|Os12g0154000|Os12g0154000|transcript|Os12t0154000-01|protein_coding||c.*2173G>A|||||1717|,T|downstream_gene_variant|MODIFIER|Os12g0154000|Os12g0154000|transcript|Os12t0154000-02|protein_coding||c.*3333G>A|||||3156|
12	2663623	A	T	ANN=T|missense_variant|MODERATE|Os12g0154000|Os12g0154000|transcript|Os12t0154000-02|protein_coding|6/6|c.952T>A|p.Ser318Thr|1331/1558|952/1002|318/333||,T|downstream_gene_variant|MODIFIER|Os12g0153900|Os12g0153900|transcript|Os12t0153900-00|protein_coding||c.*3364A>T|||||3133|,T|intron_variant|MODIFIER|Os12g0154000|Os12g0154000|transcript|Os12t0154000-01|protein_coding|6/8|c.891-33T>A||||||
12	2686857	C	T	ANN=T|missense_variant|MODERATE|Os12g0154600|Os12g0154600|transcript|Os12t0154600-01|protein_coding|5/6|c.593C>T|p.Ala198Val|794/1508|593/1002|198/333||,T|missense_variant|MODERATE|Os12g0154600|Os12g0154600|transcript|Os12t0154600-02|protein_coding|5/6|c.593C>T|p.Ala198Val|732/1628|593/1002|198/333||,T|downstream_gene_variant|MODIFIER|GLP12-1|Os12g0154700|transcript|Os12t0154700-01|protein_coding…
12	2689107	C	T	ANN=T|missense_variant|MODERATE|GLP12-1|Os12g0154700|transcript|Os12t0154700-01|protein_coding|2/2|c.532G>A|p.Ala178Thr|600/948|532/690|178/229||,T|downstream_gene_variant|MODIFIER|Os12g0154600|Os12g0154600|transcript|Os12t0154600-01|protein_coding||c.*1416C>T|||||1111|,T|downstream_gene_variant|MODIFIER|GLP12-2|Os12g0154800|transcript|Os12t0154800-01|protein_coding||c.*3527G>A|||||3527|,T|downst…
12	2689262	G	A	ANN=A|missense_variant|MODERATE|GLP12-1|Os12g0154700|transcript|Os12t0154700-01|protein_coding|2/2|c.377C>T|p.Thr126Ile|445/948|377/690|126/229||,A|downstream_gene_variant|MODIFIER|Os12g0154600|Os12g0154600|transcript|Os12t0154600-01|protein_coding||c.*1571G>A|||||1266|,A|downstream_gene_variant|MODIFIER|GLP12-2|Os12g0154800|transcript|Os12t0154800-01|protein_coding||c.*3372C>T|||||3372|,A|downst…
12	2689733	G	A	ANN=A|missense_variant|MODERATE|GLP12-1|Os12g0154700|transcript|Os12t0154700-01|protein_coding|1/2|c.26C>T|p.Pro9Leu|94/948|26/690|9/229||,A|downstream_gene_variant|MODIFIER|Os12g0154600|Os12g0154600|transcript|Os12t0154600-01|protein_coding||c.*2042G>A|||||1737|,A|downstream_gene_variant|MODIFIER|GLP12-2|Os12g0154800|transcript|Os12t0154800-01|protein_coding||c.*2901C>T|||||2901|,A|downstream_ge…
12	2692778	C	G	ANN=G|missense_variant|MODERATE|GLP12-2|Os12g0154800|transcript|Os12t0154800-01|protein_coding|2/2|c.546G>C|p.Gln182His|546/690|546/690|182/229||,G|upstream_gene_variant|MODIFIER|GLP12-1|Os12g0154700|transcript|Os12t0154700-01|protein_coding||c.-3020G>C|||||2952|,G|downstream_gene_variant|MODIFIER|Os12g0154600|Os12g0154600|transcript|Os12t0154600-01|protein_coding||c.*5087C>G|||||4782|,G|downstre…
12	2697152	C	T	ANN=T|missense_variant|MODERATE|GLP12-3|Os12g0154900|transcript|Os12t0154900-00|protein_coding|1/2|c.63G>A|p.Met21Ile|63/690|63/690|21/229||,T|upstream_gene_variant|MODIFIER|GLP12-2|Os12g0154800|transcript|Os12t0154800-01|protein_coding||c.-3709G>A|||||3709|,T|downstream_gene_variant|MODIFIER|GLP12-4|Os12g0155000|transcript|Os12t0155000-01|protein_coding||c.*2233G>A|||||2023|
12	2699506	G	T	ANN=T|missense_variant|MODERATE|GLP12-4|Os12g0155000|transcript|Os12t0155000-01|protein_coding|1/1|c.467C>A|p.Ala156Asp|767/1098|467/588|156/195||,T|upstream_gene_variant|MODIFIER|GLP12-3|Os12g0154900|transcript|Os12t0154900-00|protein_coding||c.-2292C>A|||||2292|
12	2699758	C	T	ANN=T|missense_variant|MODERATE|GLP12-4|Os12g0155000|transcript|Os12t0155000-01|protein_coding|1/1|c.215G>A|p.Gly72Glu|515/1098|215/588|72/195||,T|upstream_gene_variant|MODIFIER|GLP12-3|Os12g0154900|transcript|Os12t0154900-00|protein_coding||c.-2544G>A|||||2544|
12	2725333	T	C	ANN=C|missense_variant|MODERATE|Os12g0155300|Os12g0155300|transcript|Os12t0155300-01|protein_coding|3/6|c.692T>C|p.Phe231Ser|693/1436|692/1101|231/366||WARNING_TRANSCRIPT_NO_START_CODON
12	2732680	T	A	ANN=A|stop_gained|HIGH|Os12g0155400|Os12g0155400|transcript|Os12t0155400-00|protein_coding|1/1|c.16A>T|p.Lys6*|16/447|16/447|6/148||WARNING_TRANSCRIPT_NO_START_CODON,A|upstream_gene_variant|MODIFIER|tRNA-Glu|ENSRNA049444701|transcript|ENSRNA049444701-T1|protein_coding||c.-2918T>A|||||2918|WARNING_TRANSCRIPT_MULTIPLE_STOP_CODONS,A|upstream_gene_variant|MODIFIER|Os12g0155600|Os12g0155600|transcript…
12	2763337	T	A	ANN=A|missense_variant|MODERATE|ONAC134|Os12g0156100|transcript|Os12t0156100-01|protein_coding|1/1|c.860T>A|p.Phe287Tyr|1016/1278|860/924|287/307||
12	16989905	A	C	ANN=C|missense_variant&splice_region_variant|MODERATE|OsTDL1A|Os12g0472500|transcript|Os12t0472500-01|protein_coding|3/4|c.248A>C|p.Gln83Pro|450/1050|248/681|83/226||
12	17009865	A	T	ANN=T|stop_gained|HIGH|Os12g0472900|Os12g0472900|transcript|Os12t0472900-00|protein_coding|1/1|c.169A>T|p.Arg57*|169/369|169/369|57/122||,T|missense_variant|MODERATE|OsPOEI19|Os12g0472800|transcript|Os12t0472800-01|protein_coding|2/2|c.967T>A|p.Tyr323Asn|1013/1495|967/1137|323/378||
12	17010558	C	A	ANN=A|missense_variant|MODERATE|OsPOEI19|Os12g0472800|transcript|Os12t0472800-01|protein_coding|2/2|c.274G>T|p.Ala92Ser|320/1495|274/1137|92/378||,A|downstream_gene_variant|MODIFIER|Os12g0472900|Os12g0472900|transcript|Os12t0472900-00|protein_coding||c.*493C>A|||||493|
12	17070838	C	T	ANN=T|missense_variant|MODERATE|Os12g0473900|Os12g0473900|transcript|Os12t0473900-00|protein_coding|1/1|c.38C>T|p.Ala13Val|75/786|38/519|13/172||
12	17071000	T	C	ANN=C|missense_variant|MODERATE|Os12g0473900|Os12g0473900|transcript|Os12t0473900-00|protein_coding|1/1|c.200T>C|p.Val67Ala|237/786|200/519|67/172||
12	17071021	T	C	ANN=C|missense_variant|MODERATE|Os12g0473900|Os12g0473900|transcript|Os12t0473900-00|protein_coding|1/1|c.221T>C|p.Leu74Pro|258/786|221/519|74/172||
12	17071072	T	C	ANN=C|missense_variant|MODERATE|Os12g0473900|Os12g0473900|transcript|Os12t0473900-00|protein_coding|1/1|c.272T>C|p.Leu91Pro|309/786|272/519|91/172||
12	17071174	A	G	ANN=G|missense_variant|MODERATE|Os12g0473900|Os12g0473900|transcript|Os12t0473900-00|protein_coding|1/1|c.374A>G|p.Asn125Ser|411/786|374/519|125/172||
12	17071222	A	T	ANN=T|missense_variant|MODERATE|Os12g0473900|Os12g0473900|transcript|Os12t0473900-00|protein_coding|1/1|c.422A>T|p.Lys141Met|459/786|422/519|141/172||
12	21767192	T	C	ANN=C|missense_variant|MODERATE|Os12g0542300|Os12g0542300|transcript|Os12t0542300-00|protein_coding|1/1|c.433T>C|p.Cys145Arg|433/621|433/450|145/149||WARNING_TRANSCRIPT_NO_START_CODON
